# Supplementary material for: Reaction of FcCCC(O)R (Fc = ferrocenyl) with Ru3(CO)12 leading to unexpected nitro-group reduced ruthenoles and 1,2-CO-inserted triruthenium clusters
Source: Royal Society of Chemistry journal article supplement (doi:10.1039/c8ra04548h), 2018-01-01
Supplement: c8ra04548h1.pdf [file c8ra04548h1.pdf]

# Reaction of $\text{FcC}\equiv\text{CC}(\text{O})\text{R}$ (Fc=ferrocenyl) with $\text{Ru}_3(\text{CO})_{12}$ leading to unexpected nitro-group reduced ruthenoles and 1,2-CO-inserted triruthenium clusters

Lei Xu, Liping Jiang, Shasha Li, Guofang Zhang, Weiqiang Zhang and Ziwei Gao

Key Laboratory of Applied Surface and Colloid Chemistry, School of Chemistry and

Chemical Engineering, Shaanxi Normal University, Xi'an 710119, China

|                                                                                                                                                                   |     |
|-------------------------------------------------------------------------------------------------------------------------------------------------------------------|-----|
| <b>Table S1.</b> Crystal and refinement data of <b>1b</b> , <b>1d</b> , <b>2a</b> , <b>2b</b> , <b>2c</b> , <b>2d</b> , <b>4a</b> , <b>4d</b> and <b>5d</b> ..... | S1  |
| <b>Table S2.</b> The geometries parameter of <b>2c</b> .....                                                                                                      | S4  |
| <b>Table S3.</b> The geometries parameter of <b>5c</b> .....                                                                                                      | S8  |
| <b>Fig. S1.</b> The crystal structure of compound <b>1d</b> .....                                                                                                 | S12 |
| <b>Fig. S2.</b> The crystal structure of compound <b>2a</b> .....                                                                                                 | S13 |
| <b>Fig. S3.</b> The crystal structure of compound <b>2b</b> ·1/2C <sub>6</sub> H <sub>14</sub> .....                                                              | S14 |
| <b>Fig. S4.</b> The crystal structure of compound <b>2c</b> .....                                                                                                 | S15 |
| <b>Fig. S5.</b> The crystal structure of compound <b>4d</b> .....                                                                                                 | S16 |
| <b>Fig. S6.</b> The DFT-optimized structure of compound <b>5c</b> .....                                                                                           | S17 |
| <sup>1</sup> H NMR spectra of all new compounds.....                                                                                                              | S18 |
| <sup>13</sup> C{ <sup>1</sup> H} NMR spectra of all new compounds.....                                                                                            | S29 |
| FT-IR spectra of all new compounds.....                                                                                                                           | S40 |

**Table S1.** Crystal and refinement data of **1b**, **1d**, **2a**, **2b**, **2c**, **2d**, **4a**, **4d** and **5d**.

| Compounds                                           | <b>1b</b>                                                                      | <b>1d</b>                                                                      | <b>2a</b>                                                           |
|-----------------------------------------------------|--------------------------------------------------------------------------------|--------------------------------------------------------------------------------|---------------------------------------------------------------------|
| formula                                             | C <sub>44</sub> H <sub>28</sub> Fe <sub>2</sub> O <sub>8</sub> Ru <sub>2</sub> | C <sub>44</sub> H <sub>28</sub> Fe <sub>2</sub> O <sub>8</sub> Ru <sub>2</sub> | C <sub>27</sub> H <sub>12</sub> FeO <sub>11</sub> Ru <sub>3</sub> S |
| Fw(g mol <sup>-1</sup> )                            | 998.50                                                                         | 998.50                                                                         | 903.49                                                              |
| Wavelength(Å)                                       | 0.71073                                                                        | 0.71073                                                                        | 0.71073                                                             |
| T (K)                                               | 296(2)                                                                         | 296(2)                                                                         | 153(2)                                                              |
| crystal system                                      | Triclinic                                                                      | Monoclinic                                                                     | Monoclinic                                                          |
| space group                                         | P-1                                                                            | P2(1)/c                                                                        | P2(1)/c                                                             |
| a (Å)                                               | 12.420(2)                                                                      | 9.8872(5)                                                                      | 17.659(3)                                                           |
| b (Å)                                               | 12.656(2)                                                                      | 24.2002(12)                                                                    | 10.0342(19)                                                         |
| c (Å)                                               | 14.050(2)                                                                      | 15.6004(8)                                                                     | 33.191(7)                                                           |
| α(°)                                                | 94.236(5)                                                                      | 90.00                                                                          | 90.00                                                               |
| β(°)                                                | 106.349(5)                                                                     | 96.503(2)                                                                      | 101.971(5)                                                          |
| γ(°)                                                | 107.077(5)                                                                     | 90.00                                                                          | 90.00                                                               |
| V (Å <sup>3</sup> )                                 | 1996.0(5)                                                                      | 3708.7(3)                                                                      | 5753.4(19)                                                          |
| Z                                                   | 2                                                                              | 4                                                                              | 8                                                                   |
| D <sub>c</sub> (Mg m <sup>-3</sup> )                | 1.661                                                                          | 1.788                                                                          | 2.086                                                               |
| Absorption coefficient (mm <sup>-1</sup> )          | 1.507                                                                          | 1.622                                                                          | 2.172                                                               |
| F(000)                                              | 992                                                                            | 1984                                                                           | 3488                                                                |
| Crystal sizes (mm)                                  | 0.17×0.13×0.11                                                                 | 0.13×0.12×0.10                                                                 | 0.14×0.13×0.10                                                      |
| collected/unique                                    | 69759/7831                                                                     | 89603/7292                                                                     | 76940/5660                                                          |
| R <sub>int</sub>                                    | 0.0396                                                                         | 0.0530                                                                         | 0.0376                                                              |
| Data/restraints/parameters                          | 7831/0/ 505                                                                    | 7292/0/505                                                                     | 5660/0/388                                                          |
| GOF on F <sup>2</sup>                               | 1.108                                                                          | 1.074                                                                          | 1.193                                                               |
| R1, wR2 [ <i>I</i> ≥ 2σ( <i>I</i> )]                | 0.0294, 0.0695                                                                 | 0.0245, 0.0501                                                                 | 0.0255, 0.0497                                                      |
| R1, wR2 ( <i>all data</i> )                         | 0.0323, 0.0695                                                                 | 0.0315, 0.0529                                                                 | 0.0301, 0.0511                                                      |
| <i>largestdiff. Peak/hole</i> (e. Å <sup>-3</sup> ) | 0.412, -0.599                                                                  | 0.383,-0.501                                                                   | 0.504,-0.503                                                        |

**Table S1.** Crystal and refinement data of **1b**, **1d**, **2a**, **2b**, **2c**, **2d**, **4a**, **4d** and **5d**.

| Complex                                             | <b>2b</b>                                                                                     | <b>2c</b>                                                                                                        | <b>2d</b>                                                                                     |
|-----------------------------------------------------|-----------------------------------------------------------------------------------------------|------------------------------------------------------------------------------------------------------------------|-----------------------------------------------------------------------------------------------|
| formula                                             | C <sub>43</sub> H <sub>31</sub> Fe <sub>2</sub> O <sub>8</sub> Ru <sub>2</sub> S <sub>2</sub> | C <sub>5.03</sub> H <sub>2.74</sub> Fe <sub>0.23</sub> O <sub>1.37</sub><br>Ru <sub>0.34</sub> S <sub>0.23</sub> | C <sub>40</sub> H <sub>24</sub> Fe <sub>2</sub> O <sub>8</sub> Ru <sub>2</sub> S <sub>2</sub> |
| Fw(g mol <sup>-1</sup> )                            | 1053.64                                                                                       | 139.85                                                                                                           | 1010.55                                                                                       |
| Wavelength(Å)                                       | 0.71073                                                                                       | 0.71073                                                                                                          | 0.71073                                                                                       |
| T (K)                                               | 296(2)                                                                                        | 153(2)                                                                                                           | 154(2)                                                                                        |
| crystal system                                      | Triclinic                                                                                     | Monoclinic                                                                                                       | Monoclinic                                                                                    |
| space group                                         | P-1                                                                                           | P2(1)/c                                                                                                          | P2(1)/c                                                                                       |
| a (Å)                                               | 11.9891(10)                                                                                   | 14.508(4)                                                                                                        | 12.0452(5)                                                                                    |
| b (Å)                                               | 12.0802(10)                                                                                   | 8.676(3)                                                                                                         | 18.9355(8)                                                                                    |
| c (Å)                                               | 15.8425(14)                                                                                   | 34.637(10)                                                                                                       | 16.7320(8)                                                                                    |
| α(°)                                                | 92.359(3)                                                                                     | 90.00                                                                                                            | 90.00                                                                                         |
| β(°)                                                | 109.803(2)                                                                                    | 99.749(10)                                                                                                       | 107.767(2)                                                                                    |
| γ(°)                                                | 108.441(3)                                                                                    | 90.00                                                                                                            | 90.00                                                                                         |
| V (Å <sup>3</sup> )                                 | 2019.5(3)                                                                                     | 4297(2)                                                                                                          | 3634.2(3)                                                                                     |
| Z                                                   | 2                                                                                             | 35                                                                                                               | 4                                                                                             |
| D <sub>c</sub> (Mg m <sup>-3</sup> )                | 1.733                                                                                         | 1.892                                                                                                            | 1.847                                                                                         |
| Absorption coefficient (mm <sup>-1</sup> )          | 1.594                                                                                         | 1.850                                                                                                            | 1.768                                                                                         |
| F(000)                                              | 1050                                                                                          | 2400                                                                                                             | 2000                                                                                          |
| Crystal sizes (mm)                                  | 0.15×0.13×0.10                                                                                | 0.15×0.14×0.12                                                                                                   | 0.17×0.13×0.11                                                                                |
| collected/unique                                    | 56992/7909                                                                                    | 67291/7879                                                                                                       | 120716/7138                                                                                   |
| R <sub>int</sub>                                    | 0.0555                                                                                        | 0.0551                                                                                                           | 0.0497                                                                                        |
| Data/restraints/parameters                          | 7909/7/515                                                                                    | 7879/172/552                                                                                                     | 7138/24/487                                                                                   |
| GOF on F <sup>2</sup>                               | 1.097                                                                                         | 1.094                                                                                                            | 1.097                                                                                         |
| R1, wR2 [ <i>I</i> ≥ 2σ( <i>I</i> )]                | 0.0435, 0.0911                                                                                | 0.1088, 0.2718                                                                                                   | 0.0259, 0.0614                                                                                |
| R1, wR2 ( <i>all data</i> )                         | 0.0601, 0.1041                                                                                | 0.1147, 0.2750                                                                                                   | 0.0298, 0.0632                                                                                |
| <i>largestdiff. Peak/hole</i> (e. Å <sup>-3</sup> ) | 1.148, -0.839                                                                                 | 6.411, -3.011                                                                                                    | 1.390, -0.816                                                                                 |

**Table S1.** Crystal and refinement data of **1b**, **1d**, **2a**, **2b**, **2c**, **2d**, **4a**, **4d** and **5d**.

| Complex                                            | <b>4a</b>                                                          | <b>4d</b>                                                                                     | <b>5d</b>                                                                                                      |
|----------------------------------------------------|--------------------------------------------------------------------|-----------------------------------------------------------------------------------------------|----------------------------------------------------------------------------------------------------------------|
| formula                                            | C <sub>29</sub> H <sub>15</sub> FeNO <sub>11</sub> Ru <sub>3</sub> | C <sub>44</sub> H <sub>30</sub> Fe <sub>2</sub> N <sub>2</sub> O <sub>8</sub> Ru <sub>2</sub> | C <sub>45</sub> H <sub>30</sub> Cl <sub>2</sub> Fe <sub>2</sub> N <sub>2</sub> O <sub>10</sub> Ru <sub>2</sub> |
| Fw(g mol <sup>-1</sup> )                           | 912.48                                                             | 1028.54                                                                                       | 1143.45                                                                                                        |
| Wavelength(Å)                                      | 0.71073                                                            | 0.71073                                                                                       | 0.71073                                                                                                        |
| T (K)                                              | 153(2)                                                             | 153(2)                                                                                        | 153(2)                                                                                                         |
| crystal system                                     | Orthorhombic                                                       | Monoclinic                                                                                    | Orthorhombic                                                                                                   |
| space group                                        | Pbca                                                               | C2/c                                                                                          | Pbca                                                                                                           |
| a (Å)                                              | 13.995(4)                                                          | 29.747(9)                                                                                     | 22.8840(19)                                                                                                    |
| b (Å)                                              | 11.729(4)                                                          | 19.893(6)                                                                                     | 15.4397(13)                                                                                                    |
| c (Å)                                              | 34.893(12)                                                         | 15.727(6)                                                                                     | 23.772(2)                                                                                                      |
| α(°)                                               | 90.00                                                              | 90.00                                                                                         | 90.00                                                                                                          |
| β(°)                                               | 90.00                                                              | 114.924(12)                                                                                   | 90.00                                                                                                          |
| γ (°)                                              | 90.00                                                              | 90.00                                                                                         | 90.00                                                                                                          |
| V (Å <sup>3</sup> )                                | 5727(3)                                                            | 8440(5)                                                                                       | 8399.2(12)                                                                                                     |
| Z                                                  | 8                                                                  | 8                                                                                             | 8                                                                                                              |
| D <sub>c</sub> (Mg m <sup>-3</sup> )               | 2.116                                                              | 1.619                                                                                         | 1.808                                                                                                          |
| Absorption coefficient (mm <sup>-1</sup> )         | 2.113                                                              | 1.430                                                                                         | 1.573                                                                                                          |
| F(000)                                             | 3536                                                               | 4096                                                                                          | 4544                                                                                                           |
| Crystal sizes (mm)                                 | 0.18×0.13×0.10                                                     | 0.15×0.13×0.10                                                                                | 0.15×0.13×0.09                                                                                                 |
| collected/unique                                   | 63513/5636                                                         | 48133/8281                                                                                    | 256536/8244                                                                                                    |
| R <sub>int</sub>                                   | 0.0390                                                             | 0.0677                                                                                        | 0.1323                                                                                                         |
| Data/restraints/parameters                         | 5636/ 0/406                                                        | 8281/44/523                                                                                   | 8244/0/568                                                                                                     |
| GOF on F <sup>2</sup>                              | 0.888                                                              | 1.072                                                                                         | 1.064                                                                                                          |
| R1, wR2 [ <i>I</i> ≥ 2σ( <i>I</i> )]               | 0.0270, 0.0592                                                     | 0.0533, 0.1256                                                                                | 0.0248, 0.0553                                                                                                 |
| R1, wR2 ( <i>all data</i> )                        | 0.0390, 0.0651                                                     | 0.0720, 0.1396                                                                                | 0.0319, 0.0594                                                                                                 |
| <i>largstdiff. Peak/hole</i> (e. Å <sup>-3</sup> ) | 0.798, -0.515                                                      | 1.489, -1.500                                                                                 | 0.548, -0.761                                                                                                  |

**Table S2.** The geometries parameter of **2c**.

B3LYP/LanL2DZ/6-31G

| Center<br>Number | Atomic<br>Number | Atomic<br>Type | Coordinates (Angstroms) |           |           |
|------------------|------------------|----------------|-------------------------|-----------|-----------|
|                  |                  |                | X                       | Y         | Z         |
| 1                | 44               | 0              | -0.599579               | -1.549890 | 1.534200  |
| 2                | 44               | 0              | -2.150053               | -2.399389 | -0.658424 |
| 3                | 44               | 0              | 0.624377                | -1.589450 | -1.141122 |
| 4                | 26               | 0              | -2.062340               | 3.786692  | 0.571448  |
| 5                | 26               | 0              | 3.977356                | 3.102761  | -0.362217 |
| 6                | 16               | 0              | -6.315861               | 0.620176  | 0.481913  |
| 7                | 6                | 0              | -1.340872               | 1.842445  | 1.163336  |
| 8                | 6                | 0              | -2.454871               | 2.259533  | 2.007111  |
| 9                | 1                | 0              | -3.384602               | 1.739734  | 2.163828  |
| 10               | 6                | 0              | -2.100482               | 3.476730  | 2.670776  |
| 11               | 1                | 0              | -2.731920               | 4.022571  | 3.358680  |
| 12               | 6                | 0              | -0.780906               | 3.854091  | 2.244522  |
| 13               | 1                | 0              | -0.239169               | 4.741070  | 2.550040  |
| 14               | 6                | 0              | -0.316006               | 2.870086  | 1.313396  |
| 15               | 1                | 0              | 0.635264                | 2.887317  | 0.813058  |
| 16               | 6                | 0              | -2.580111               | 3.919097  | -1.484371 |
| 17               | 1                | 0              | -2.481602               | 3.116809  | -2.201830 |
| 18               | 6                | 0              | -3.737157               | 4.195794  | -0.670536 |
| 19               | 1                | 0              | -4.660868               | 3.639074  | -0.665777 |
| 20               | 6                | 0              | -3.438240               | 5.343949  | 0.144127  |
| 21               | 1                | 0              | -4.094613               | 5.788604  | 0.880730  |
| 22               | 6                | 0              | -2.098197               | 5.774064  | -0.164310 |
| 23               | 1                | 0              | -1.573487               | 0.301766  | 6.602532  |
| 24               | 6                | 0              | -1.568397               | 4.886497  | -1.166158 |
| 25               | 1                | 0              | -0.579334               | 4.945541  | -1.614189 |

---

|    |   |   |           |           |           |
|----|---|---|-----------|-----------|-----------|
| 26 | 6 | 0 | -1.197607 | 0.535742  | 0.441854  |
| 27 | 6 | 0 | -2.240329 | -0.452363 | 0.336826  |
| 28 | 6 | 0 | -3.638186 | -0.231617 | 0.822325  |
| 29 | 6 | 0 | -4.597827 | 0.401835  | -0.091429 |
| 30 | 6 | 0 | -4.450835 | 0.851914  | -1.390321 |
| 31 | 1 | 0 | -3.508490 | 0.794216  | -1.927370 |
| 32 | 6 | 0 | -5.653125 | 1.373560  | -1.968174 |
| 33 | 1 | 0 | -5.713110 | 1.757910  | -2.980071 |
| 34 | 6 | 0 | -6.729374 | 1.331802  | -1.113285 |
| 35 | 1 | 0 | -7.746777 | 1.657453  | -1.295633 |
| 36 | 6 | 0 | 3.576021  | 1.190503  | 0.469825  |
| 37 | 6 | 0 | 3.541313  | 2.202172  | 1.508237  |
| 38 | 1 | 0 | 2.687801  | 2.434245  | 2.130790  |
| 39 | 6 | 0 | 4.833346  | 2.823185  | 1.565498  |
| 40 | 1 | 0 | 5.121017  | 3.624810  | 2.231688  |
| 41 | 6 | 0 | 5.670513  | 2.211552  | 0.564124  |
| 42 | 1 | 0 | 6.695914  | 2.481513  | 0.343537  |
| 43 | 6 | 0 | 4.899351  | 1.217892  | -0.117436 |
| 44 | 1 | 0 | 5.240355  | 0.601247  | -0.943084 |
| 45 | 6 | 0 | 2.442075  | 3.669514  | -1.713807 |
| 46 | 1 | 0 | 1.532348  | 3.107608  | -1.864097 |
| 47 | 6 | 0 | 2.644087  | 4.709377  | -0.734294 |
| 48 | 1 | 0 | 1.902980  | 5.072291  | -0.032612 |
| 49 | 6 | 0 | 4.005645  | 5.166574  | -0.843730 |
| 50 | 1 | 0 | 4.472019  | 5.931524  | -0.234710 |
| 51 | 6 | 0 | 4.646303  | 4.409775  | -1.889109 |
| 52 | 1 | 0 | 5.677801  | 4.504446  | -2.200412 |
| 53 | 6 | 0 | 3.681880  | 3.484714  | -2.426028 |
| 54 | 1 | 0 | 3.857351  | 2.766471  | -3.217092 |

---

---

|    |    |   |           |           |           |
|----|----|---|-----------|-----------|-----------|
| 55 | 6  | 0 | 2.480459  | 0.299426  | 0.097092  |
| 56 | 6  | 0 | 2.510397  | -0.954197 | -0.440674 |
| 57 | 6  | 0 | 3.727704  | -1.740118 | -0.759038 |
| 58 | 6  | 0 | 4.646987  | -2.106721 | 0.315326  |
| 59 | 16 | 0 | 6.180165  | -3.006862 | -0.115135 |
| 60 | 6  | 0 | 4.562074  | -1.910485 | 1.684553  |
| 61 | 1  | 0 | 3.727683  | -1.395668 | 2.154073  |
| 62 | 6  | 0 | 5.673483  | -2.436623 | 2.422381  |
| 63 | 1  | 0 | 5.765469  | -2.368625 | 3.502721  |
| 64 | 6  | 0 | 6.617038  | -3.042718 | 1.626165  |
| 65 | 1  | 0 | 7.542920  | -3.521695 | 1.922114  |
| 66 | 6  | 0 | 0.113524  | 0.042912  | -0.016376 |
| 67 | 6  | 0 | -1.771001 | -1.989521 | 3.043862  |
| 68 | 6  | 0 | 0.642895  | -0.752775 | 2.768506  |
| 69 | 6  | 0 | 0.304742  | -3.232364 | 1.409449  |
| 70 | 6  | 0 | -3.167291 | -3.261821 | 0.743879  |
| 71 | 6  | 0 | -3.677363 | -2.274640 | -1.866532 |
| 72 | 6  | 0 | -1.659247 | -4.173182 | -1.330183 |
| 73 | 6  | 0 | -1.114467 | -1.239795 | -2.227214 |
| 74 | 6  | 0 | 1.283547  | -3.400030 | -1.652363 |
| 75 | 6  | 0 | 1.424790  | -0.832738 | -2.714273 |
| 76 | 8  | 0 | -4.021022 | -0.655881 | 1.948429  |
| 77 | 8  | 0 | 3.939335  | -2.150365 | -1.938701 |
| 78 | 8  | 0 | -2.348247 | -2.272955 | 4.020424  |
| 79 | 8  | 0 | 1.438595  | -0.275448 | 3.490530  |
| 80 | 8  | 0 | 0.801574  | -4.300582 | 1.468043  |
| 81 | 8  | 0 | -3.839736 | -3.853698 | 1.500774  |
| 82 | 8  | 0 | -4.609522 | -2.256862 | -2.575628 |
| 83 | 8  | 0 | -1.398040 | -5.232437 | -1.756517 |

---

---

|    |   |   |           |           |           |
|----|---|---|-----------|-----------|-----------|
| 84 | 8 | 0 | -1.486975 | -0.604500 | -3.170396 |
| 85 | 8 | 0 | 1.704290  | -4.458842 | -1.921810 |
| 86 | 8 | 0 | 1.866135  | -0.307631 | -3.664281 |
| 87 | 8 | 0 | 1.209773  | 0.863715  | 0.310315  |

---



**Table S3.** The geometries parameter of **5c**.

B3LYP/LanL2DZ/6-31G

| Center | Atomic | Atomic | Coordinates (Angstroms) |           |           |
|--------|--------|--------|-------------------------|-----------|-----------|
| Number | Number | Type   | X                       | Y         | Z         |
| 1      | 44     | 0      | -0.762950               | -1.178198 | 1.394063  |
| 2      | 44     | 0      | -0.728721               | -1.177692 | -1.446095 |
| 3      | 26     | 0      | 3.047435                | -3.703959 | -0.190909 |
| 4      | 26     | 0      | -4.822902               | 0.799434  | -0.159900 |
| 5      | 8      | 0      | 2.199015                | 0.474328  | 2.745697  |
| 6      | 8      | 0      | 6.849633                | 5.121902  | 0.187283  |
| 7      | 8      | 0      | 5.988108                | 4.847364  | -1.900345 |
| 8      | 8      | 0      | -0.625875               | 2.307066  | 2.691666  |
| 9      | 8      | 0      | 0.858070                | -2.784646 | 3.554655  |
| 10     | 8      | 0      | -2.945276               | -0.514574 | 3.555877  |
| 11     | 8      | 0      | -2.227243               | -3.757157 | 0.396686  |
| 12     | 8      | 0      | 0.444026                | 0.815318  | -3.545945 |
| 13     | 8      | 0      | 0.148549                | -3.868718 | -2.922580 |
| 14     | 8      | 0      | -3.481105               | -1.795268 | -2.941145 |
| 15     | 7      | 0      | 6.015748                | 4.589040  | -0.637696 |
| 16     | 7      | 0      | 0.166444                | 7.492425  | -1.196511 |
| 17     | 1      | 0      | 0.166096                | 8.360291  | -0.650071 |
| 18     | 1      | 0      | 0.283428                | 7.568635  | -2.212593 |
| 19     | 6      | 0      | 2.352638                | -1.620480 | -0.294003 |
| 20     | 6      | 0      | 2.974634                | -2.037103 | -1.568146 |
| 21     | 1      | 0      | 2.488237                | -2.019377 | -2.553236 |
| 22     | 6      | 0      | 4.359134                | -2.417786 | -1.313455 |
| 23     | 1      | 0      | 5.077124                | -2.773679 | -2.067275 |
| 24     | 6      | 0      | 4.611446                | -2.275677 | 0.118788  |
| 25     | 1      | 0      | 5.549193                | -2.520173 | 0.639815  |

---

|    |   |   |           |           |           |
|----|---|---|-----------|-----------|-----------|
| 26 | 6 | 0 | 3.384989  | -1.802757 | 0.751073  |
| 27 | 1 | 0 | 3.250981  | -1.633526 | 1.827573  |
| 28 | 6 | 0 | 1.483305  | -5.154194 | 0.196259  |
| 29 | 1 | 0 | 0.406883  | -4.939448 | 0.266031  |
| 30 | 6 | 0 | 2.208878  | -5.522303 | -1.019624 |
| 31 | 1 | 0 | 1.778288  | -5.609025 | -2.026875 |
| 32 | 6 | 0 | 3.610540  | -5.730497 | -0.661428 |
| 33 | 1 | 0 | 3.610540  | -5.730497 | -0.661428 |
| 34 | 6 | 0 | 3.751229  | -5.492002 | 0.775649  |
| 35 | 1 | 0 | 4.687387  | -5.544778 | 1.351868  |
| 36 | 6 | 0 | 2.435180  | -5.136709 | 1.306860  |
| 37 | 1 | 0 | 2.206521  | -4.880591 | 2.351914  |
| 38 | 6 | 0 | 0.948129  | 0.302581  | 0.644749  |
| 39 | 6 | 0 | 1.031025  | -0.899205 | -0.177787 |
| 40 | 6 | 0 | 2.100459  | 0.826330  | 1.529613  |
| 41 | 6 | 0 | 3.107612  | 1.794866  | 0.926284  |
| 42 | 6 | 0 | 4.057048  | 2.417187  | 1.806403  |
| 43 | 1 | 0 | 4.020277  | 2.170577  | 2.882179  |
| 44 | 6 | 0 | 5.015150  | 3.332877  | 1.300711  |
| 45 | 1 | 0 | 5.749133  | 3.828501  | 1.957856  |
| 46 | 6 | 0 | 5.016562  | 3.614506  | -0.096965 |
| 47 | 6 | 0 | 4.096837  | 3.005266  | -0.996117 |
| 48 | 1 | 0 | 4.139594  | 3.250759  | -2.070094 |
| 49 | 6 | 0 | 3.138045  | 2.093556  | -0.475705 |
| 50 | 1 | 0 | 2.420405  | 1.612725  | -1.163032 |
| 51 | 6 | 0 | -2.683468 | 1.270183  | -0.338622 |
| 52 | 6 | 0 | -3.342243 | 2.098122  | 0.694862  |
| 53 | 1 | 0 | -3.088190 | 2.116180  | 1.763495  |
| 54 | 6 | 0 | -4.393931 | 2.884559  | 0.062117  |

---

---

|    |   |   |           |           |           |
|----|---|---|-----------|-----------|-----------|
| 55 | 1 | 0 | -5.068998 | 3.585170  | 0.575867  |
| 56 | 6 | 0 | -5.068998 | 3.585170  | 0.575867  |
| 57 | 1 | 0 | -5.121732 | 2.946118  | -2.108465 |
| 58 | 6 | 0 | -3.393536 | 1.542179  | -1.604501 |
| 59 | 1 | 0 | -3.153939 | 1.101649  | -2.581796 |
| 60 | 6 | 0 | -5.237181 | -1.225930 | 0.486492  |
| 61 | 1 | 0 | -4.485144 | -1.997885 | 0.704558  |
| 62 | 6 | 0 | -5.786552 | -0.267664 | 1.445257  |
| 63 | 1 | 0 | -5.500501 | -0.175012 | 2.503226  |
| 64 | 6 | 0 | -6.760027 | 0.565534  | 0.738047  |
| 65 | 1 | 0 | -7.334425 | 1.397743  | 1.172641  |
| 66 | 6 | 0 | -6.811086 | 0.120043  | -0.654945 |
| 67 | 1 | 0 | -7.431931 | 0.556495  | -1.452264 |
| 68 | 6 | 0 | -5.870696 | -0.987510 | -0.810535 |
| 69 | 1 | 0 | -5.666736 | -1.535230 | -1.741139 |
| 70 | 6 | 0 | -0.322326 | 1.058207  | 0.608943  |
| 71 | 6 | 0 | -1.390924 | 0.502586  | -0.210067 |
| 72 | 6 | 0 | -0.433200 | 2.369846  | 1.428326  |
| 73 | 6 | 0 | -0.272123 | 3.673094  | 0.710985  |
| 74 | 6 | 0 | -0.116171 | 3.774707  | -0.716412 |
| 75 | 1 | 0 | -0.121495 | 2.861976  | -1.339295 |
| 76 | 6 | 0 | 0.027052  | 5.030218  | -1.351517 |
| 77 | 1 | 0 | 0.138067  | 5.085809  | -2.451667 |
| 78 | 6 | 0 | 0.022950  | 6.246795  | -0.575177 |
| 79 | 6 | 0 | -0.133399 | 6.151173  | 0.859093  |
| 80 | 1 | 0 | -0.139021 | 7.076248  | 1.467431  |
| 81 | 6 | 0 | -0.279246 | 4.892544  | 1.480216  |
| 82 | 1 | 0 | -0.402408 | 4.817058  | 2.576120  |
| 83 | 6 | 0 | 0.243098  | -2.166533 | 2.738937  |

---

---

|    |   |   |           |           |           |
|----|---|---|-----------|-----------|-----------|
| 84 | 6 | 0 | -2.119005 | -0.766911 | 2.732351  |
| 85 | 6 | 0 | -1.636946 | -2.709718 | 0.518048  |
| 86 | 6 | 0 | -0.019770 | 0.028696  | -2.770221 |
| 87 | 6 | 0 | -2.500045 | -1.519053 | -2.324466 |
| 88 | 6 | 0 | -0.116786 | -2.883901 | -2.307534 |

---

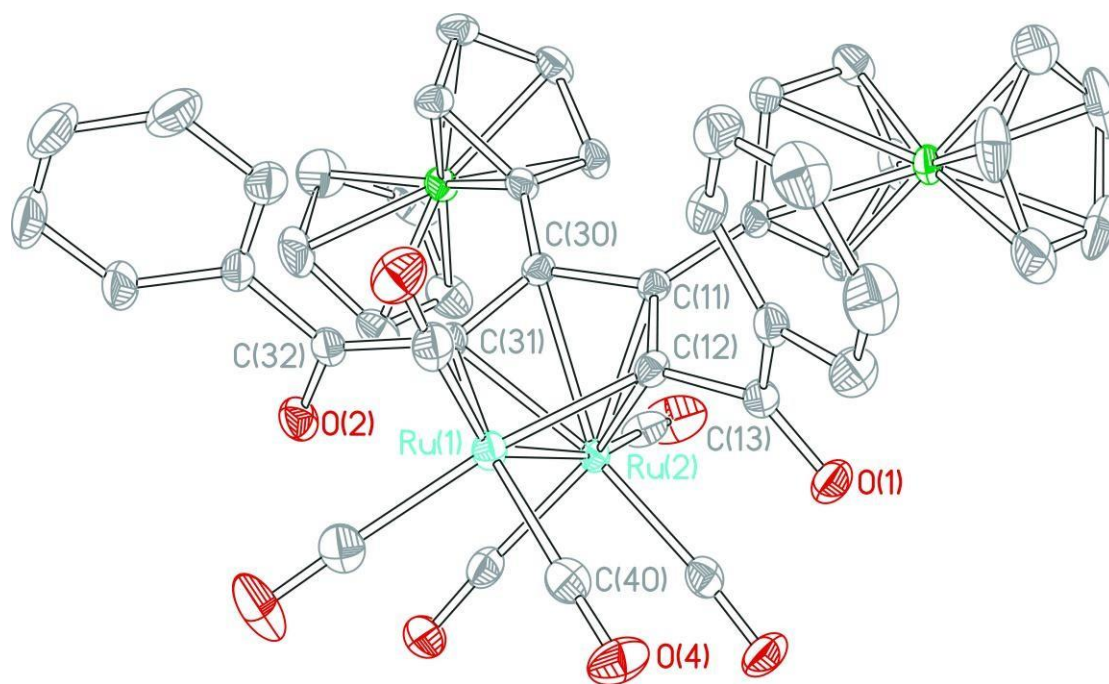

ORTEP view of cluster **1d** showing 50% ellipsoids. Selected bond lengths (Å) and bond angles (°):  
 Ru1-Ru2 = 2.7141(3), Ru1-C31 = 2.0957(21), Ru1-C12 = 2.0668(21), Ru2-C11 = 2.2647(22),  
 Ru2-C12 = 2.2655(21), Ru2-C30 = 2.2848(22), Ru2-C31 = 2.2717(22), C30-C31 = 1.4151(30),  
 C11-C30 = 1.4868(31), C11-C12 = 1.4088(30), C12-C13 = 1.4916(31), C31-C32 = 1.4979(31),  
 C32-O2 = 1.2207(29), C13-O1 = 1.2195(28).

**Fig. S1.** The crystal structure of compound **1d**.

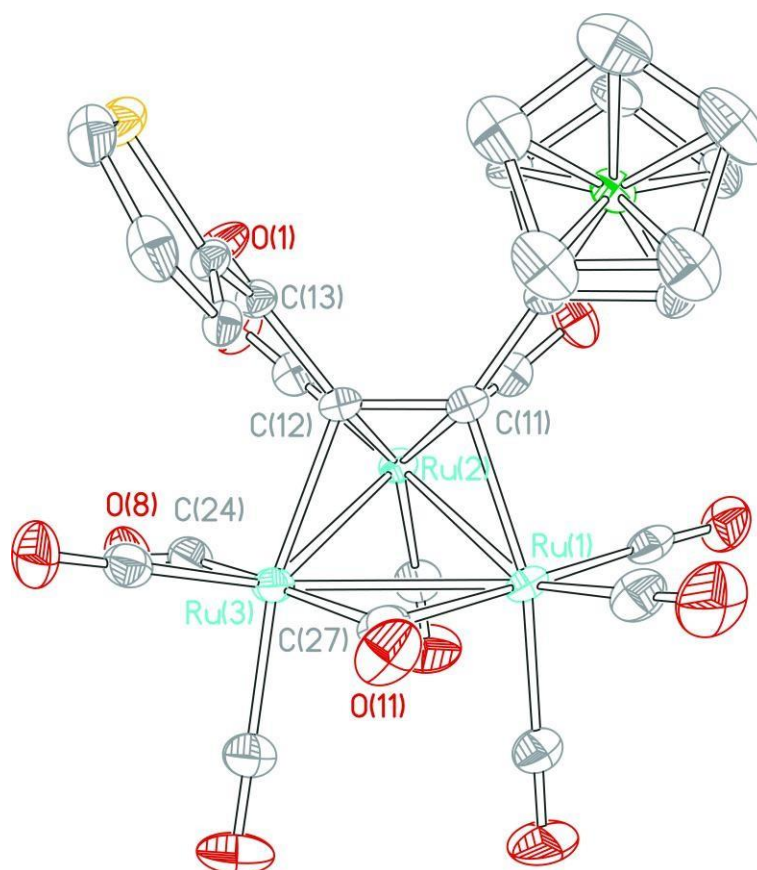

ORTEP view of cluster **2a** showing 50% ellipsoids. Selected bond lengths (Å) and bond angles (°):  
 Ru1-Ru2 = 2.7500(5), Ru2-Ru3 = 2.7282(5), Ru1-Ru3 = 2.8111(5), Ru1-C11 = 2.0969(25),  
 Ru1-C27 = 2.2763(33), Ru2-C11 = 2.3335(28), Ru2-C12 = 2.2058(26), Ru3-C12 = 2.1357(28),  
 Ru3-C27 = 2.0583(32), Ru3-C24 = 1.9336(33), C11-C12 = 1.4034(42), C27-O11 = 1.1531(42),  
 C24-O8 = 1.1469(39), Ru1-C27-Ru3 = 80.691(105), Ru2-C24-Ru3 = 70.633(99).

**Fig. S2.** The crystal structure of compound **2a**.

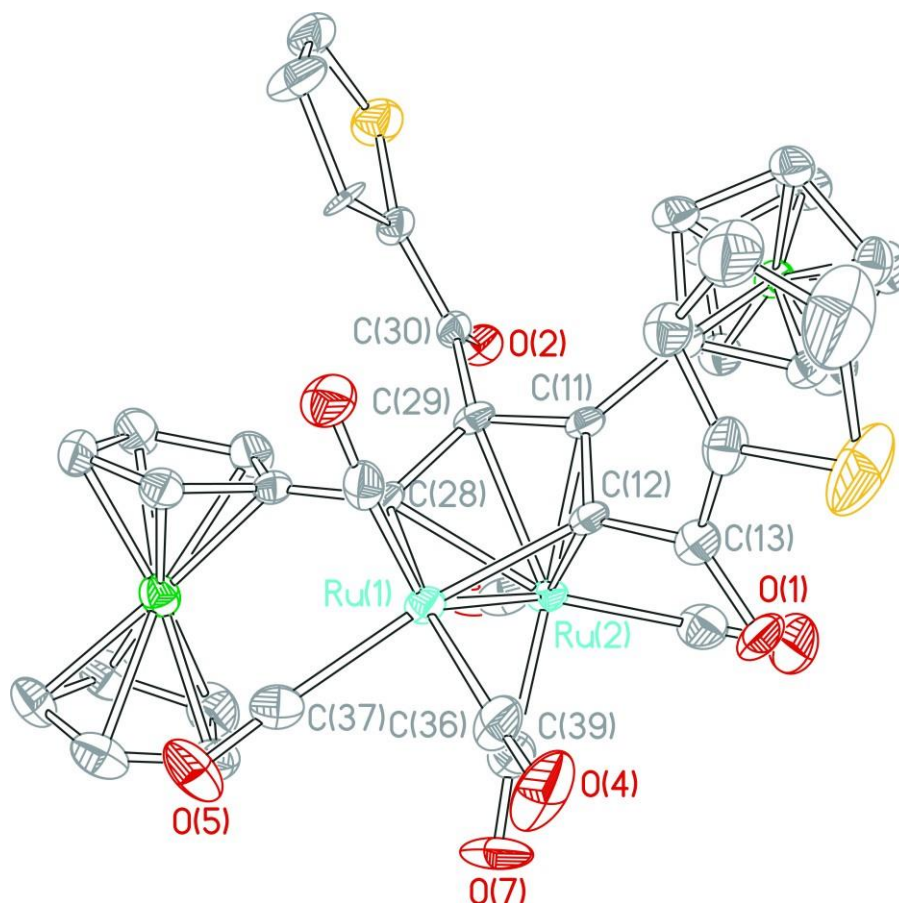

ORTEP view of cluster **2b**· $1/2\text{C}_6\text{H}_{14}$  showing 50% ellipsoids (Solvent molecules have been omitted for clarity). Selected bond lengths (Å) and bond angles (°): Ru1-Ru2 = 2.7517(5), Ru1-C28 = 2.0948(53), Ru1-C12 = 2.0805(55), Ru2-C11 = 2.2810(46), Ru2-C12 = 2.2071(40), Ru2-C28 = 2.2790(4), Ru2-C29 = 2.2594(44), C28-C29 = 1.4209(80), C11-C29 = 1.4507(70), C11-C12 = 1.4225(78), C12-C13 = 1.4845(75), C29-C30 = 1.5273(77), C30-O2 = 1.2094(50), C13-O1 = 1.2298(56), Ru1-C39-Ru2 = 68.077(184).

**Fig. S3.** The crystal structure of compound **2b**· $1/2\text{C}_6\text{H}_{14}$ .

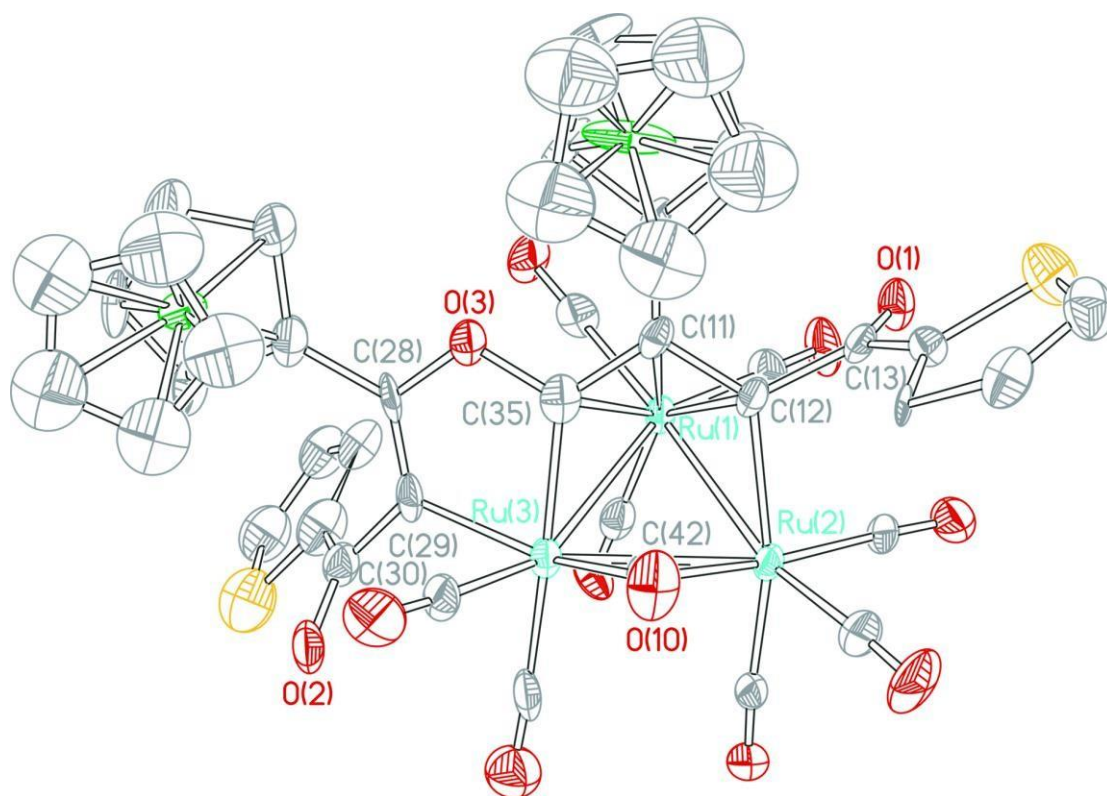

ORTEP view of cluster **2c** showing 50% ellipsoids. Selected bond lengths (Å) and bond angles (°):  
 Ru1-Ru2 = 2.7681(17); Ru2-Ru3 = 2.8236(16); Ru1-Ru3 = 2.8212(16); Ru1-C11 = 2.3280(15);  
 Ru1-C35 = 2.2528(17); Ru1-C12 = 2.2437(15); Ru2-C42 = 2.2220(17); Ru3-C29 = 2.0750(14);  
 Ru3-C35 = 2.0356(16); C11-C12 = 1.4295(19); C11-C35 = 1.4450(21); C35-O3 = 1.3687(18);  
 C28-O3 = 1.3726(187); C28-C29 = 1.3615(22); C29-C30 = 1.4899(22); C30-O2 = 1.2261(19);  
 C12-C13 = 1.4987(19); C13-O1 = 1.2347(17); Ru2-C42-Ru3 = 83.226(62); Ru3-C35-O3 =  
 115.182(10); Ru3-C35-C11 = 128.792(11).

**Fig. S4.** The crystal structure of compound **2c**.



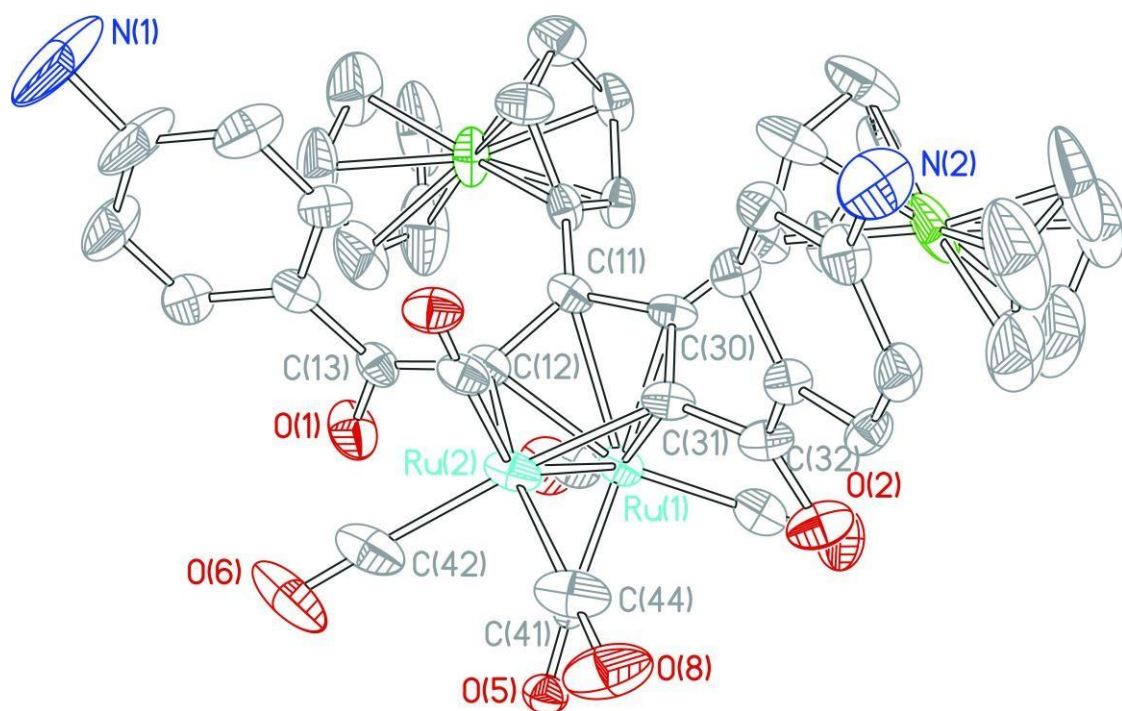

ORTEP view of cluster **4d** showing 50% ellipsoids. Selected bond lengths (Å) and bond angles (°):  
 Ru1-Ru2 = 2.7165(9), Ru1-C11 = 2.2893(73), Ru1-C12 = 2.2202(68), Ru1-C30 = 2.2714(61),  
 Ru1-C31 = 2.2192(53), Ru1-C41 = 1.8915(63), Ru2-C12 = 2.0853(52), Ru2-C31 = 2.0767(55),  
 Ru2-C41 = 2.6670(66), C11-C12 = 1.4268(61), C11-C30 = 1.4568(77), C30-C31 = 1.4303(90),  
 C12-C13 = 1.4880(73), C31-C32 = 1.4927(79), C32-O2 = 1.2360(93), C13-O1 = 1.2374(70),  
 Ru1-C41-Ru2 = 70.839(183), Ru1-C41-O5 = 169.979(509).

**Fig. S5.** The crystal structure of compound **4d**.

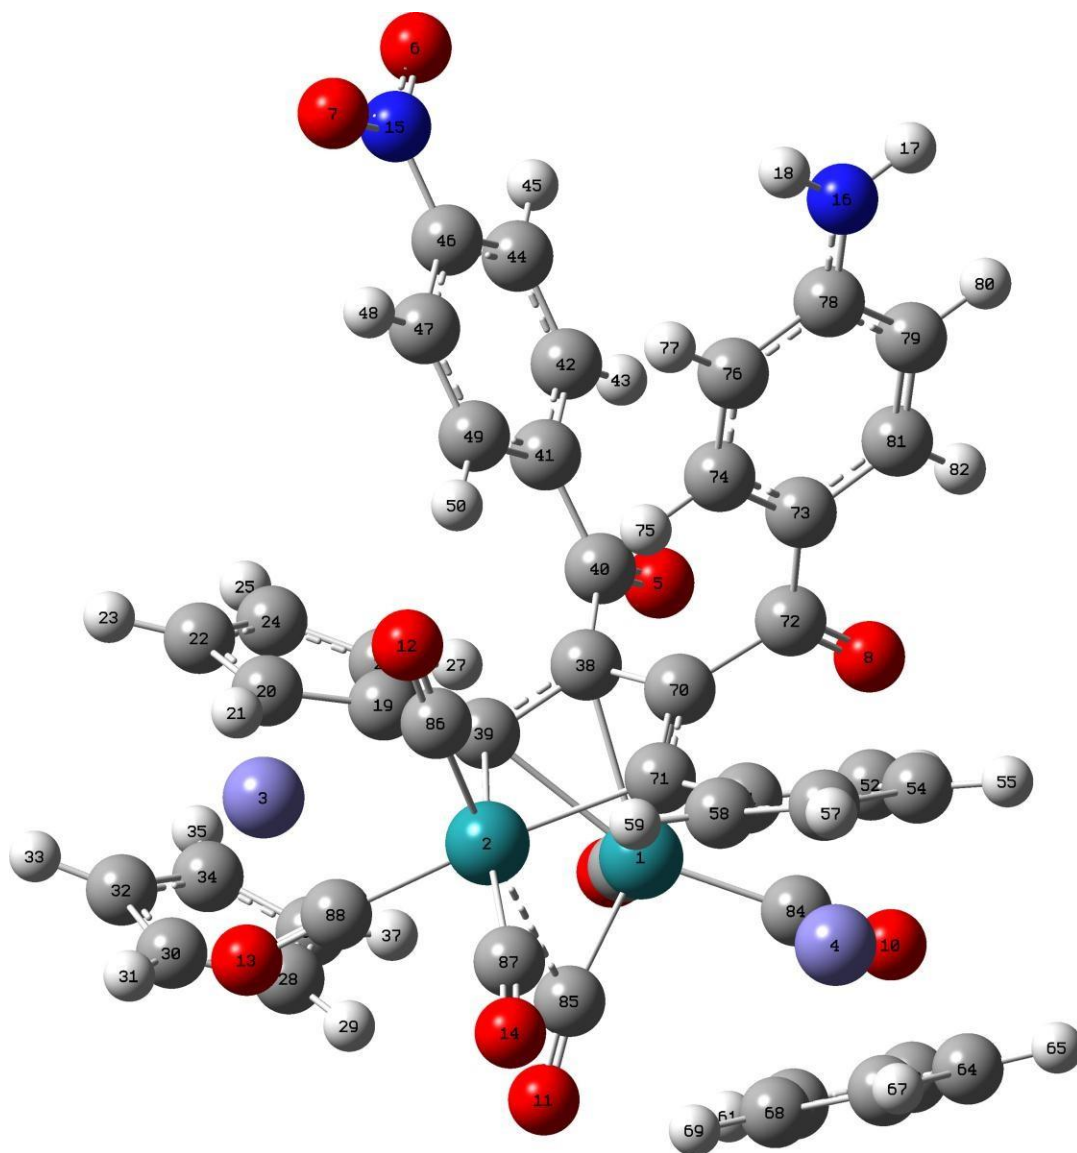

DFT-optimized structure of **5c** at the level of B3LYP/LanL2DZ/6-31G. Selected bond lengths (Å) and bond angles (°): Ru1-Ru2 = 2.7885, Ru1-C39 = 2.3595, Ru1-C38 = 2.3436, Ru1-C70 = 2.3392, Ru1-C71 = 2.3729, Ru1-C85 = 1.9265, Ru2-C39 = 2.1380, Ru2-C71 = 2.1448, Ru2-C85 = 2.6546, C38-C39 = 1.4303, C38-C70 = 1.4502, C70-C71 = 1.4308, Ru1-C85-Ru2 = 73.04.

**Fig. S6.** The DFT-optimized structure of compound **5c**.

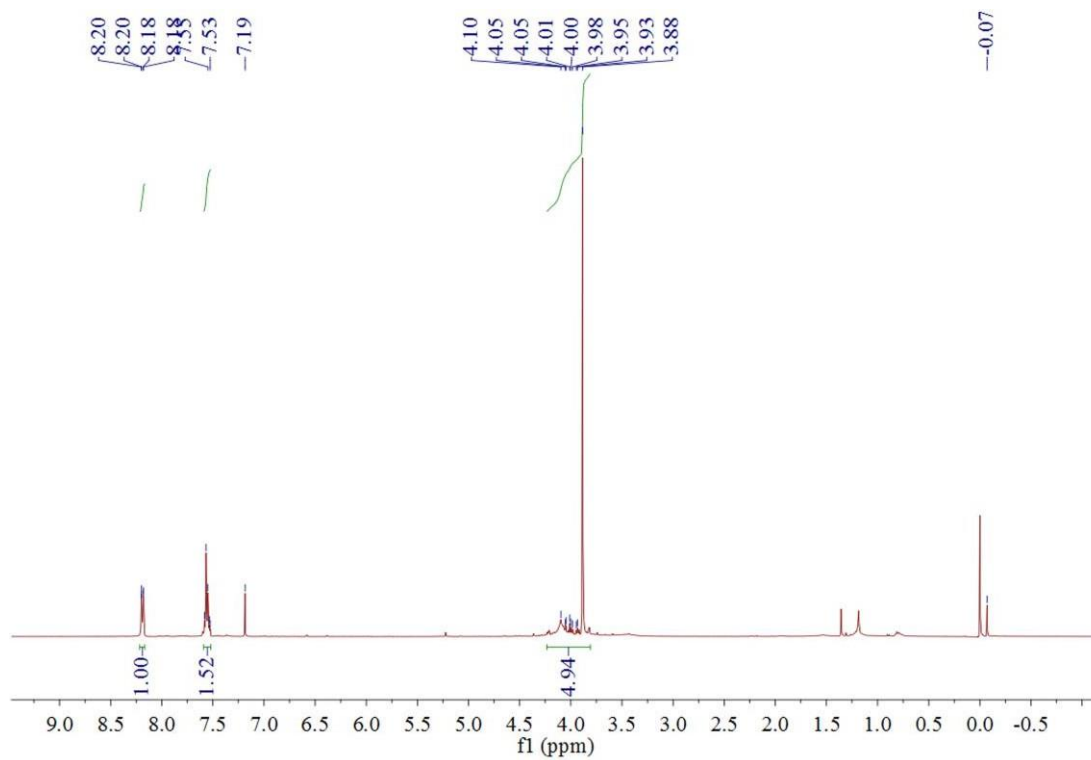

<sup>1</sup>H NMR spectrum of compound **1a**.

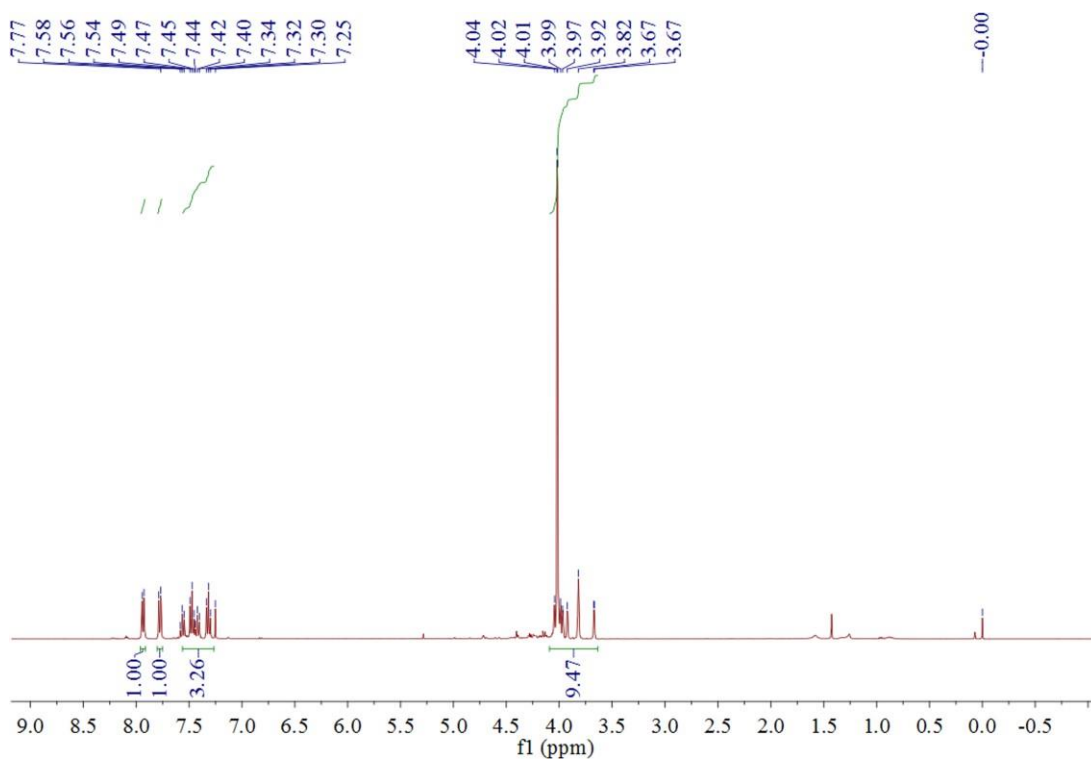

<sup>1</sup>H NMR spectrum of compound **1b**.

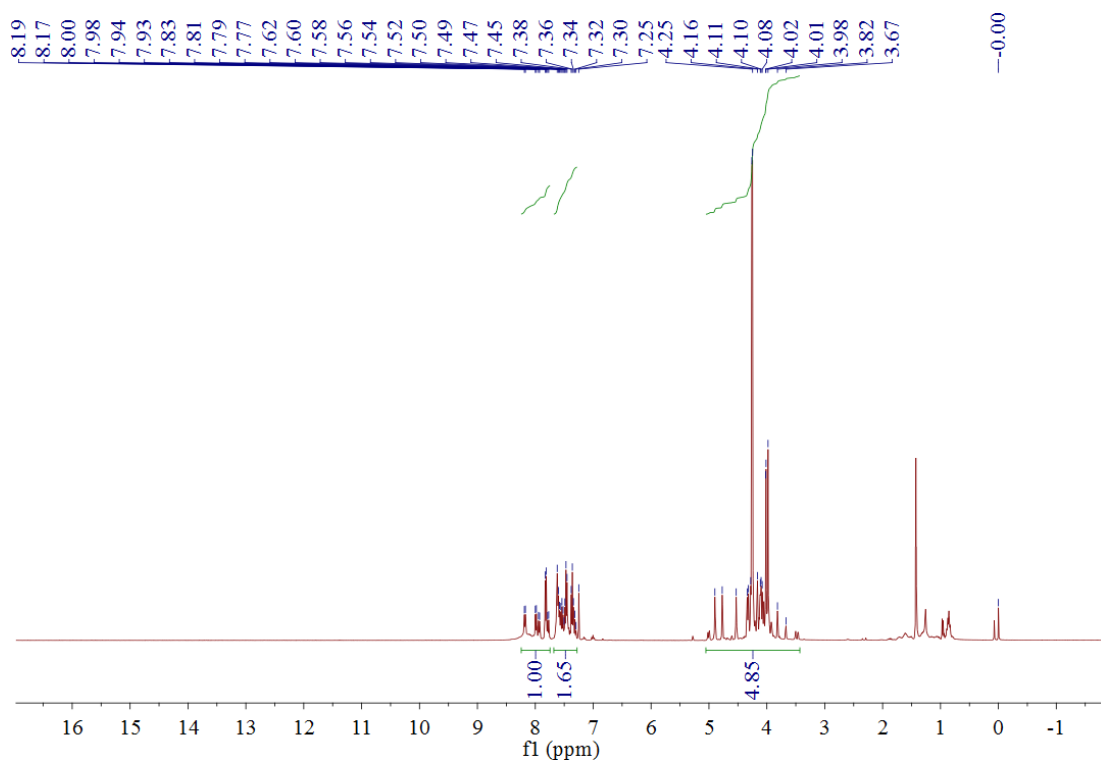

$^1\text{H}$  NMR spectrum of compound **1c**.

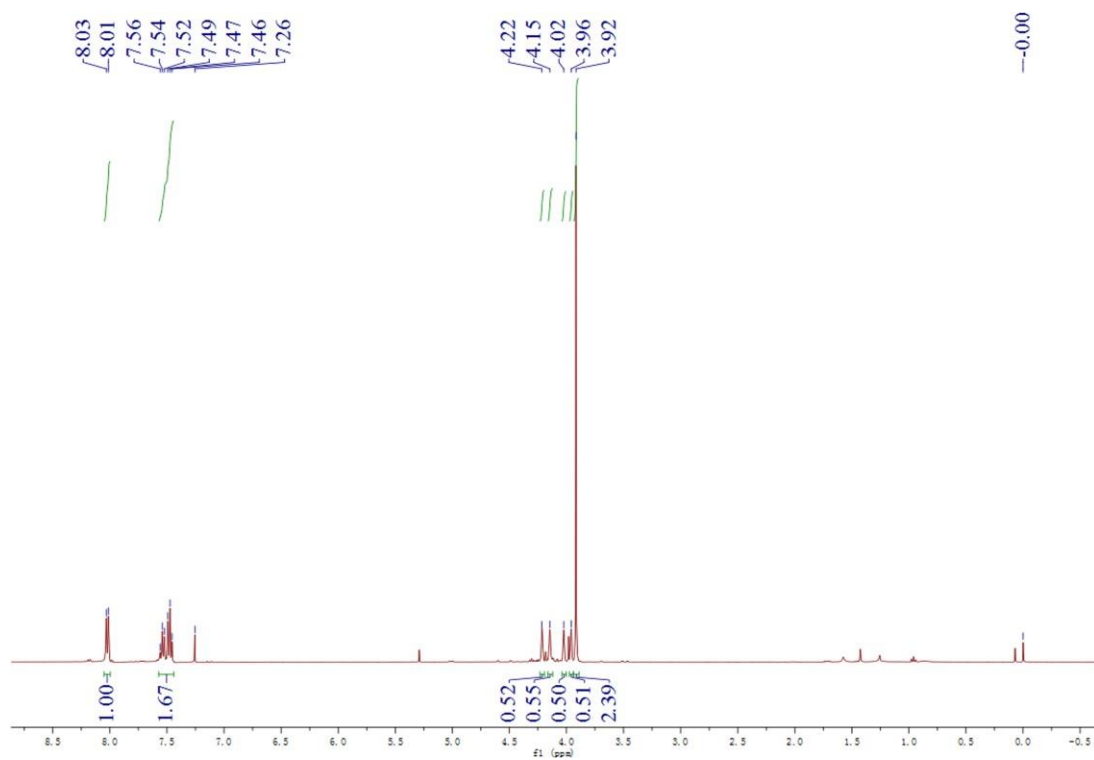

$^1\text{H}$  NMR spectrum of compound **1d**.

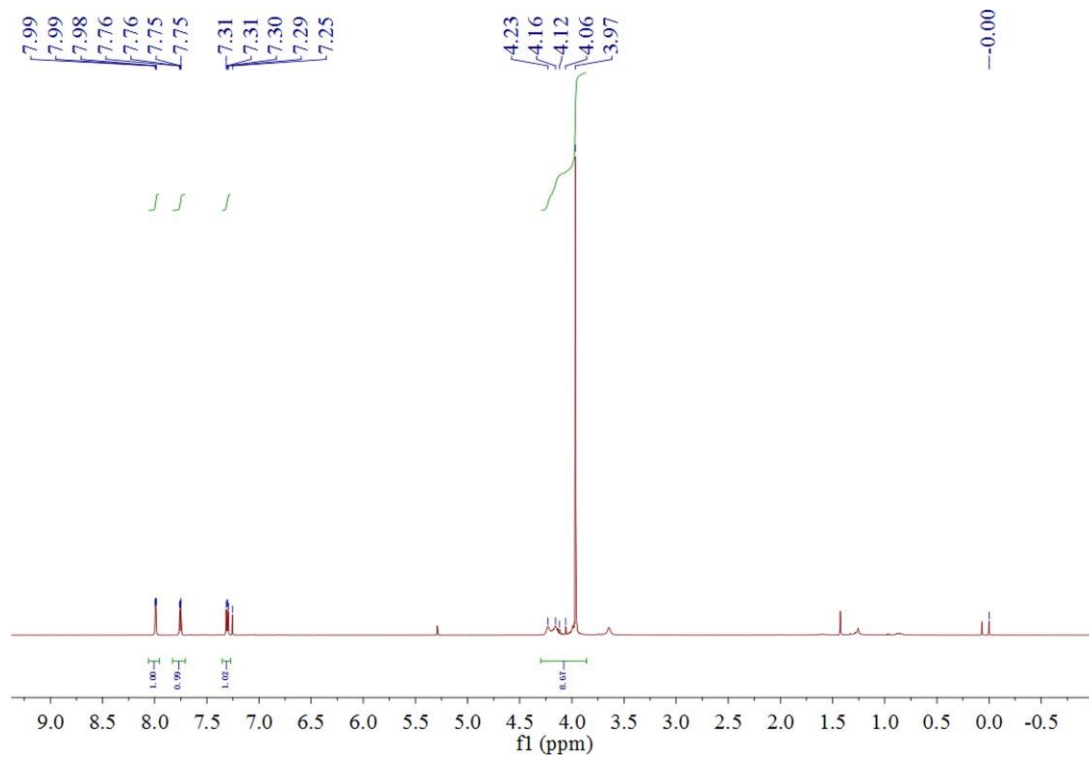

$^1\text{H}$  NMR spectrum of compound **2a**.

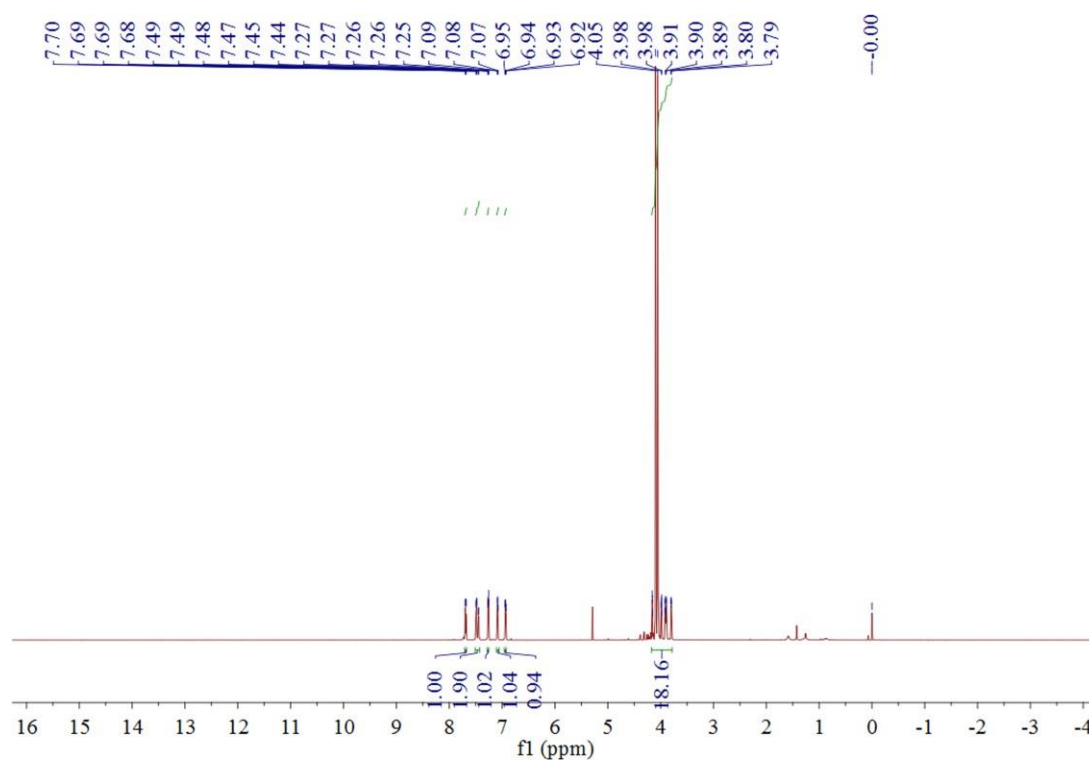

$^1\text{H}$  NMR spectrum of compound **2b**.

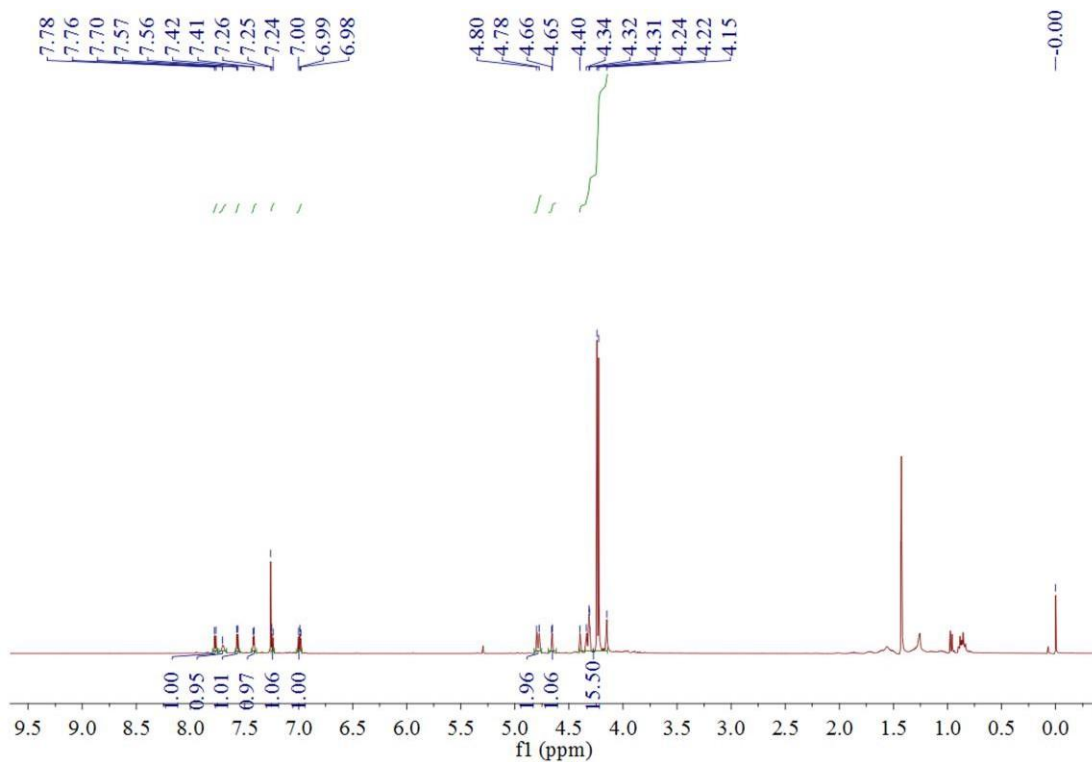

$^1\text{H}$  NMR spectrum of compound **2c**.

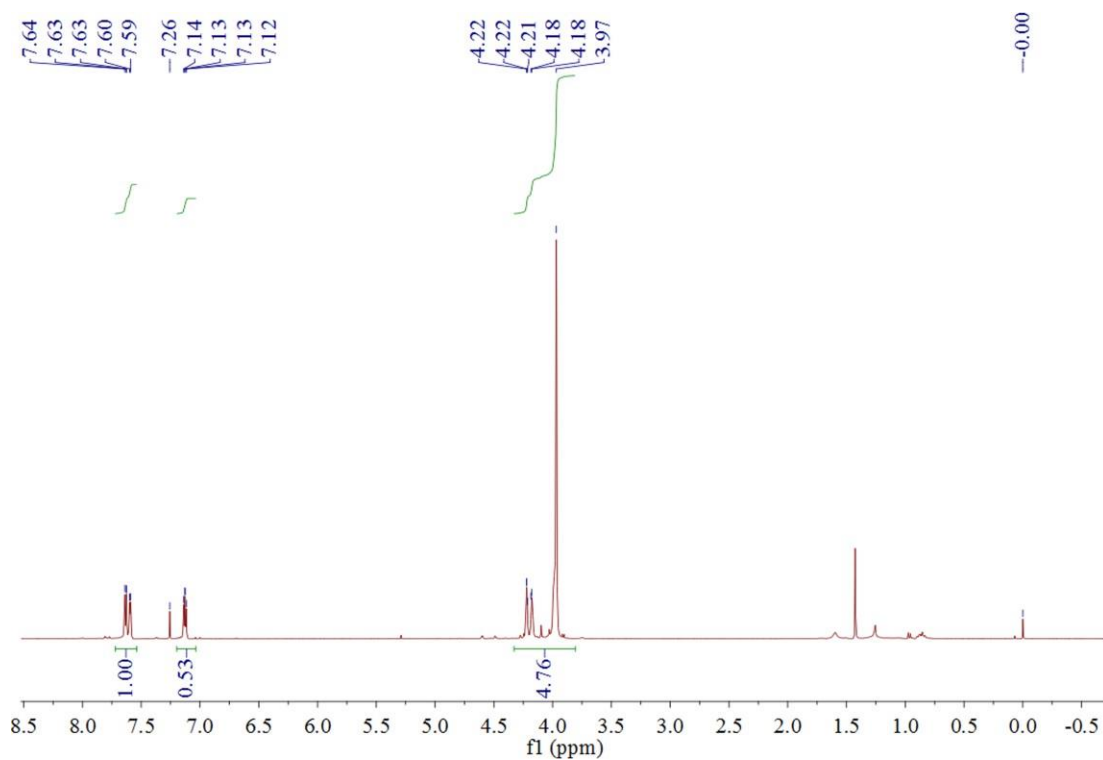

$^1\text{H}$  NMR spectrum of compound **2d**.

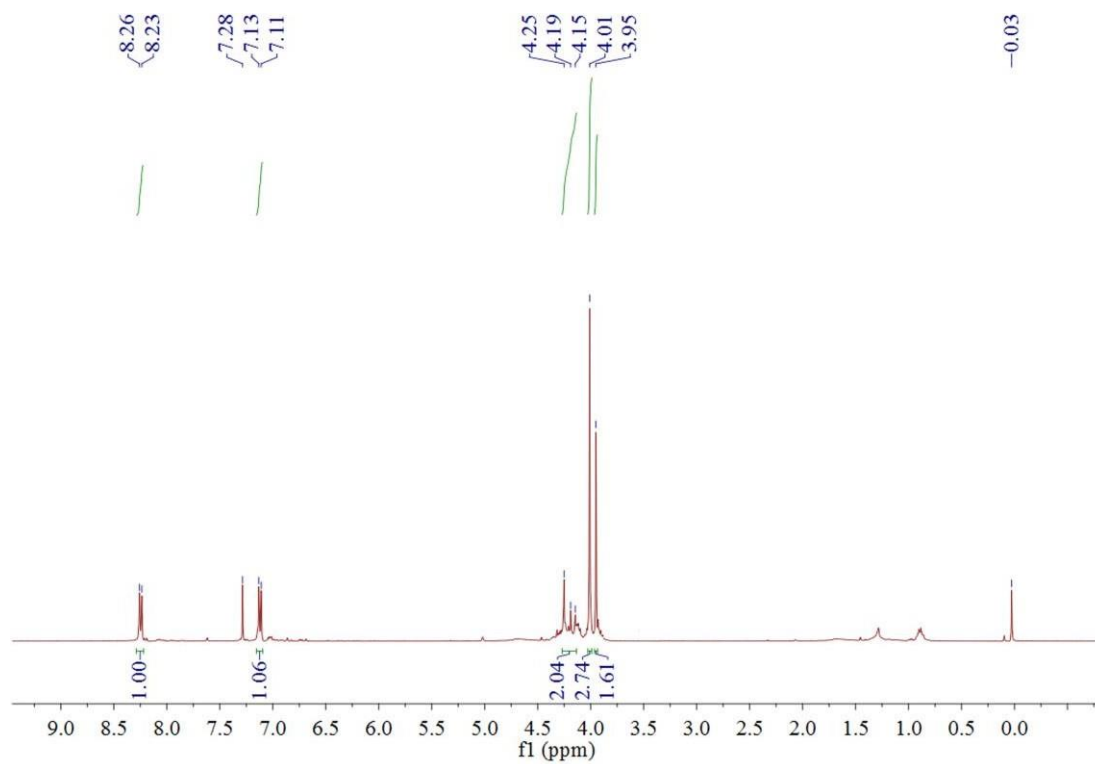

<sup>1</sup>H NMR spectrum of compound **3a**.

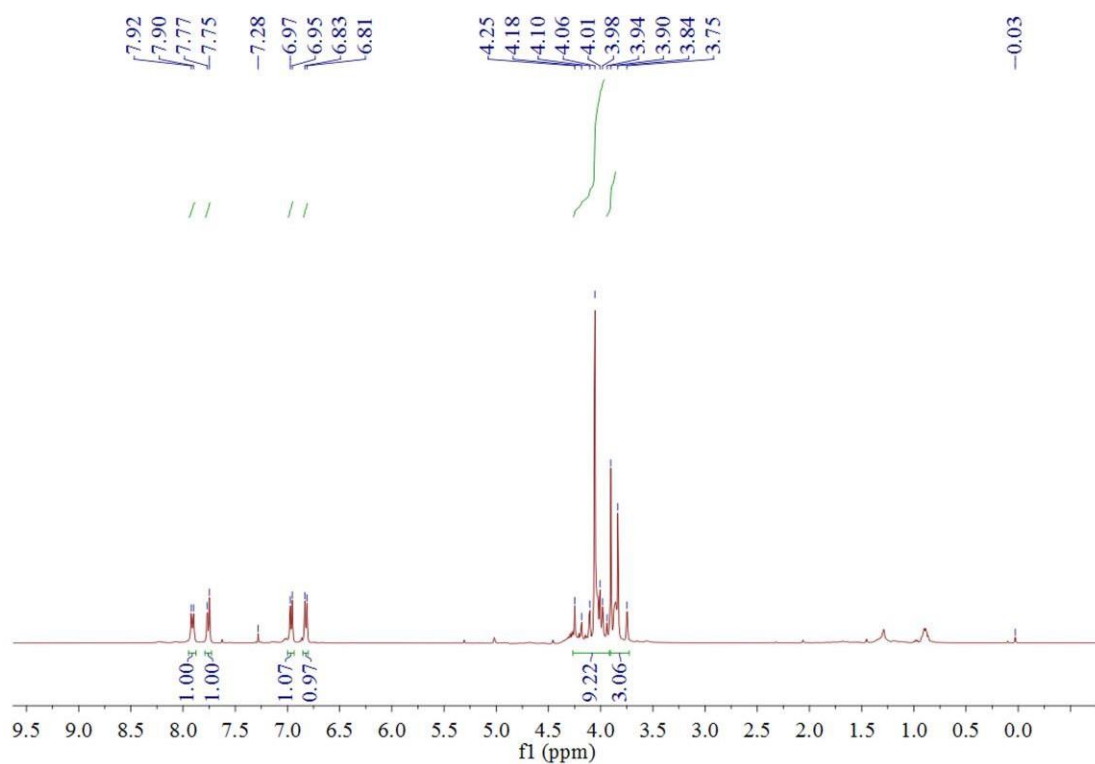

<sup>1</sup>H NMR spectrum of compound **3b**.

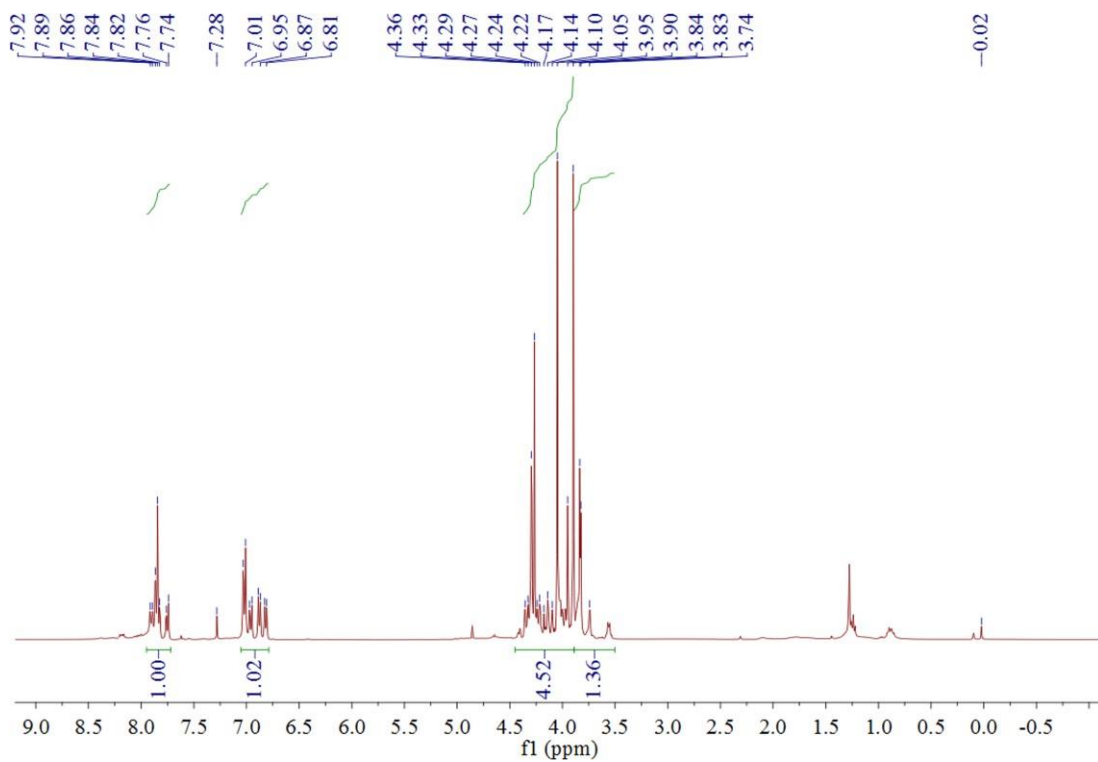

<sup>1</sup>H NMR spectrum of compound **3c**.

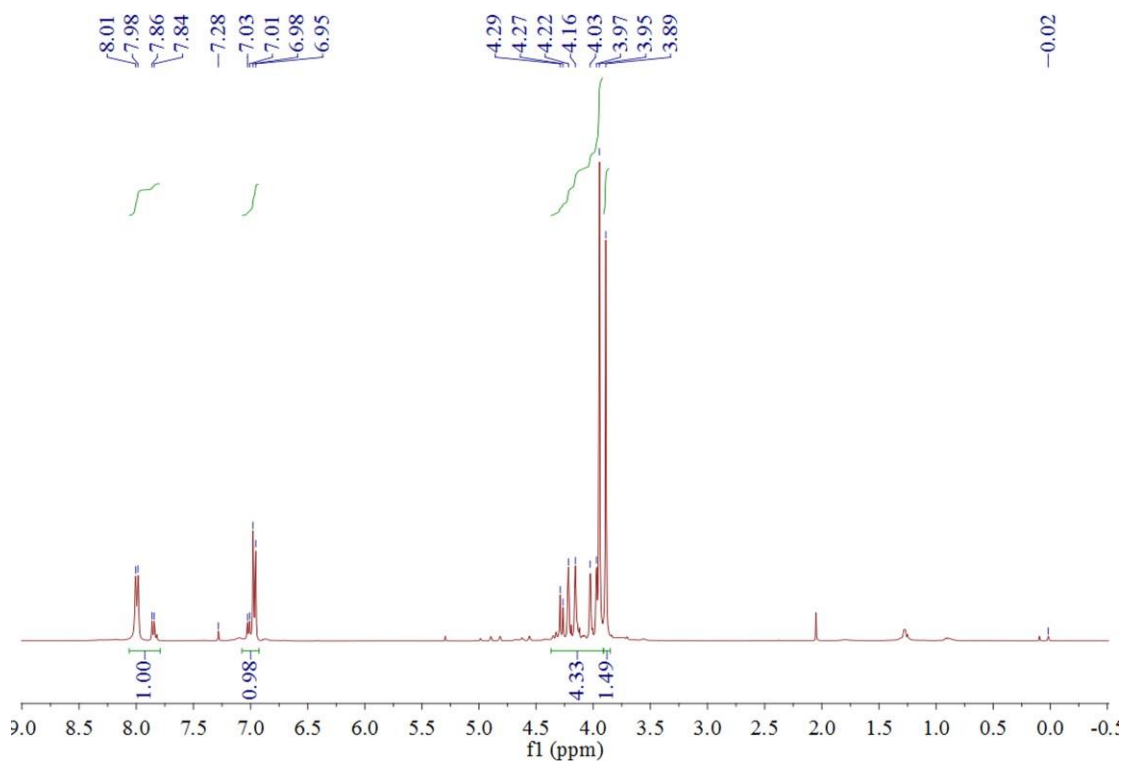

<sup>1</sup>H NMR spectrum of compound **3d**.



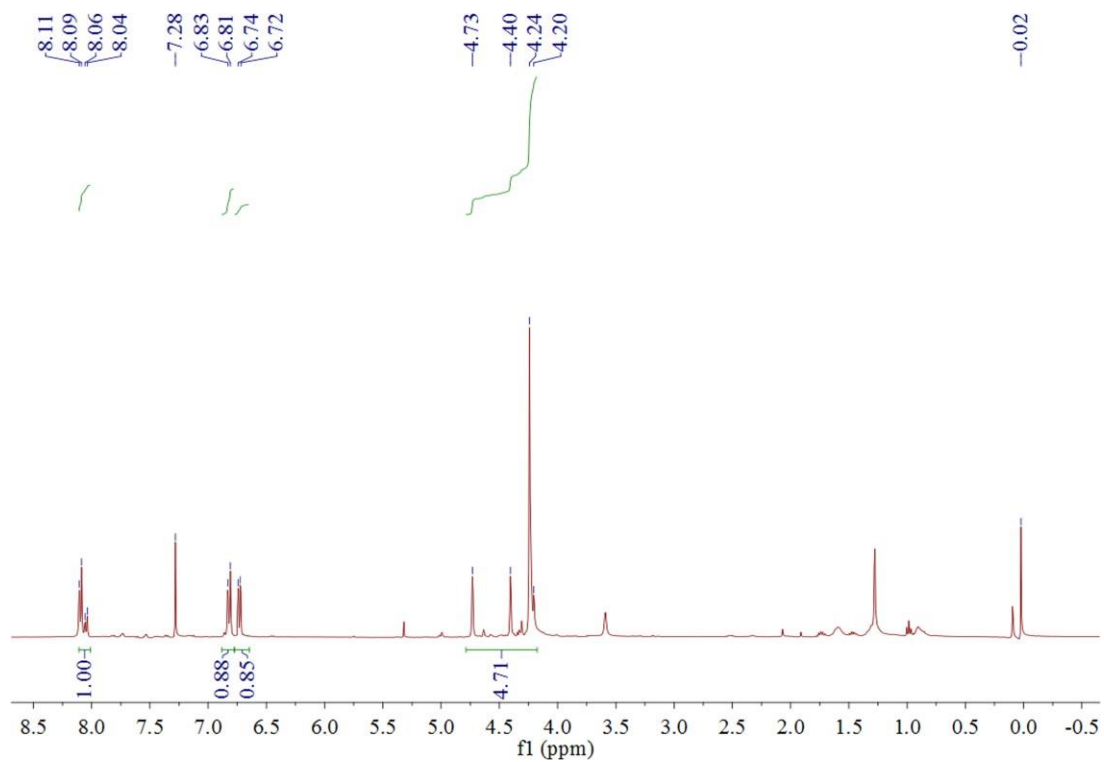

<sup>1</sup>H NMR spectrum of compound **4a**.

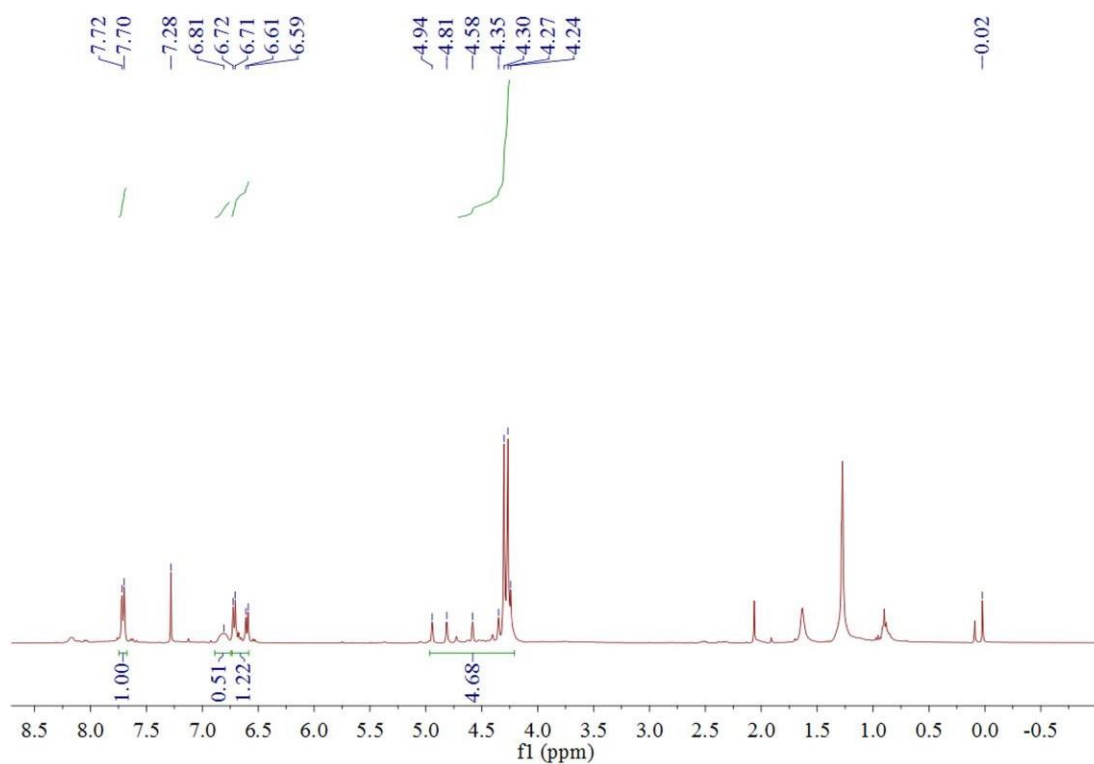

<sup>1</sup>H NMR spectrum of compound **4b**.

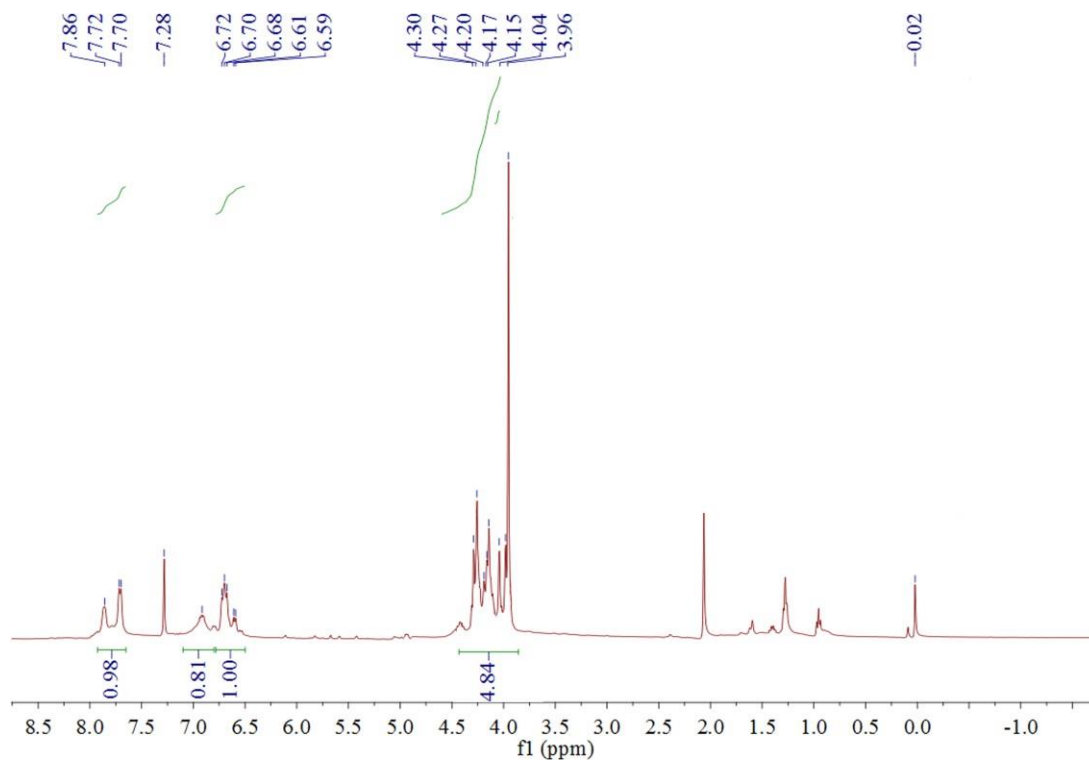

<sup>1</sup>H NMR spectrum of compound **4c**.

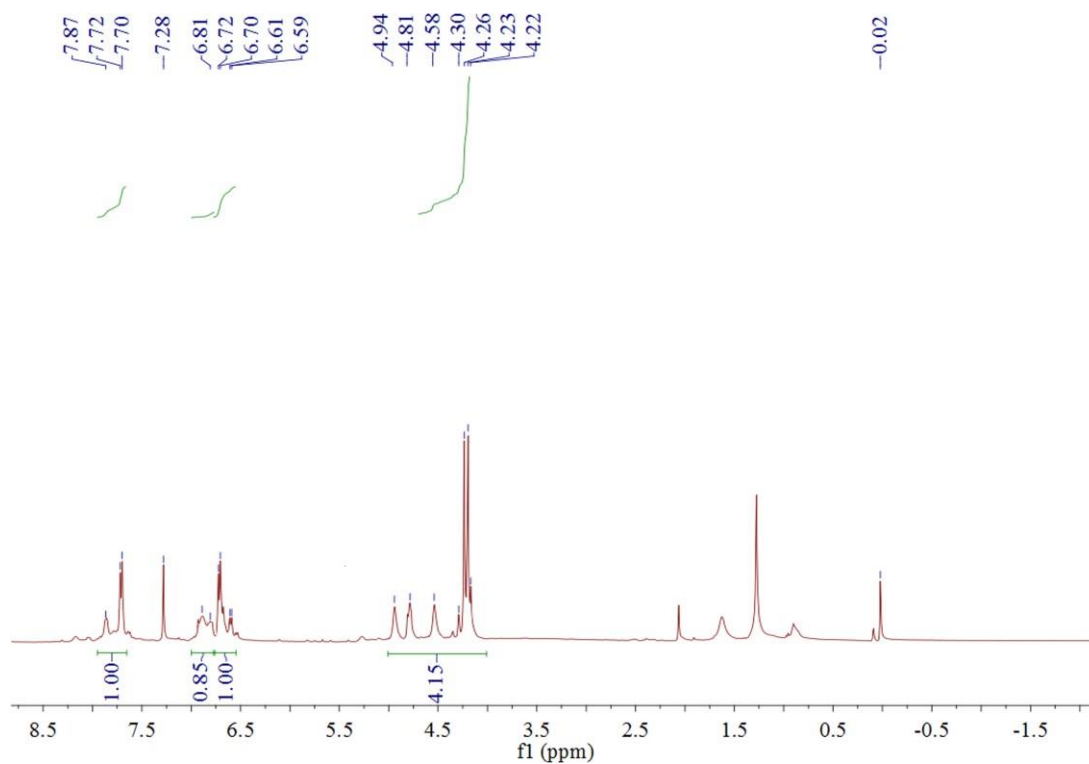

<sup>1</sup>H NMR spectrum of compound **4d**.

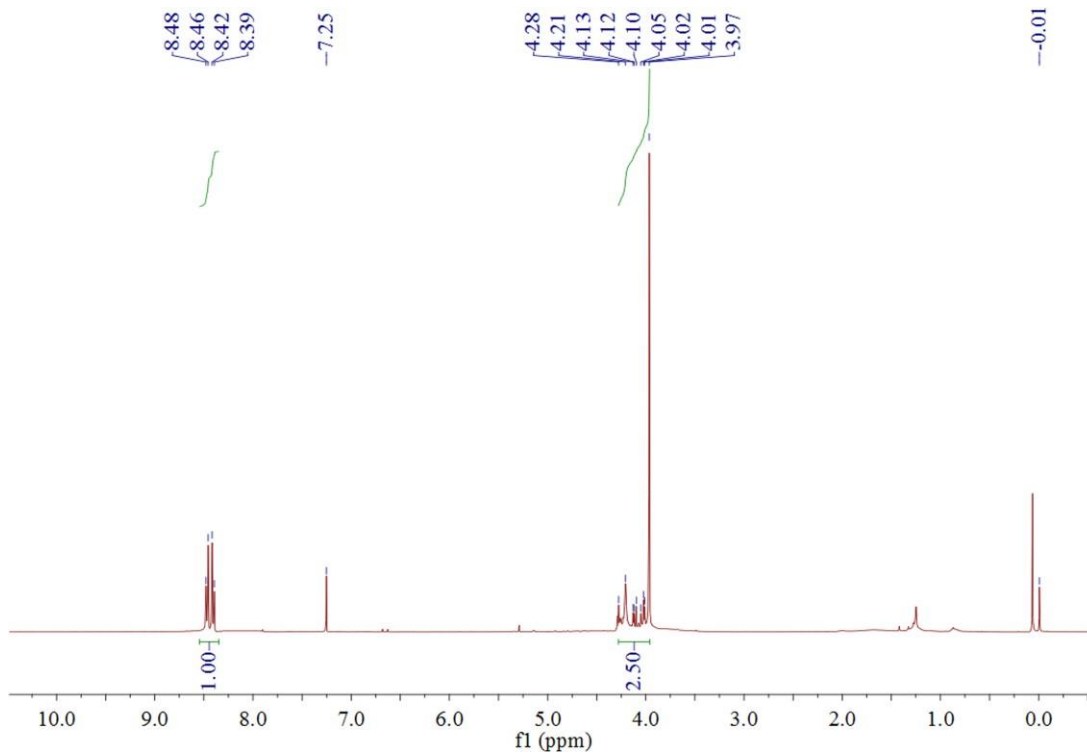

<sup>1</sup>H NMR spectrum of compound **5a**.

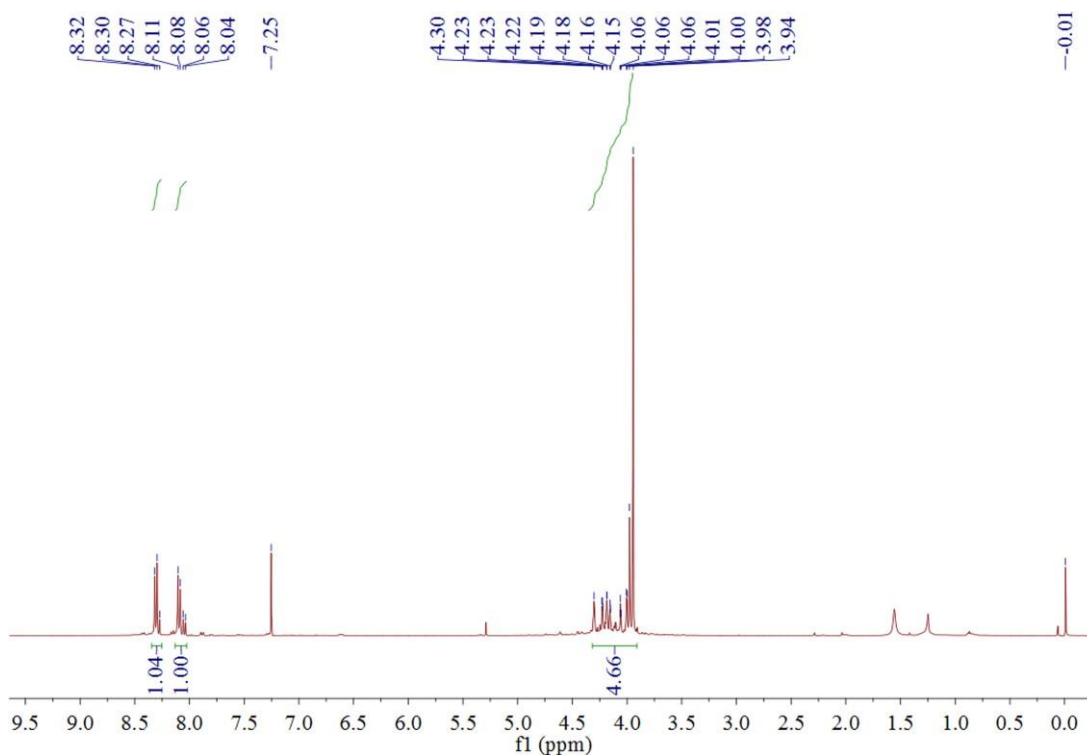

<sup>1</sup>H NMR spectrum of compound **5b**.

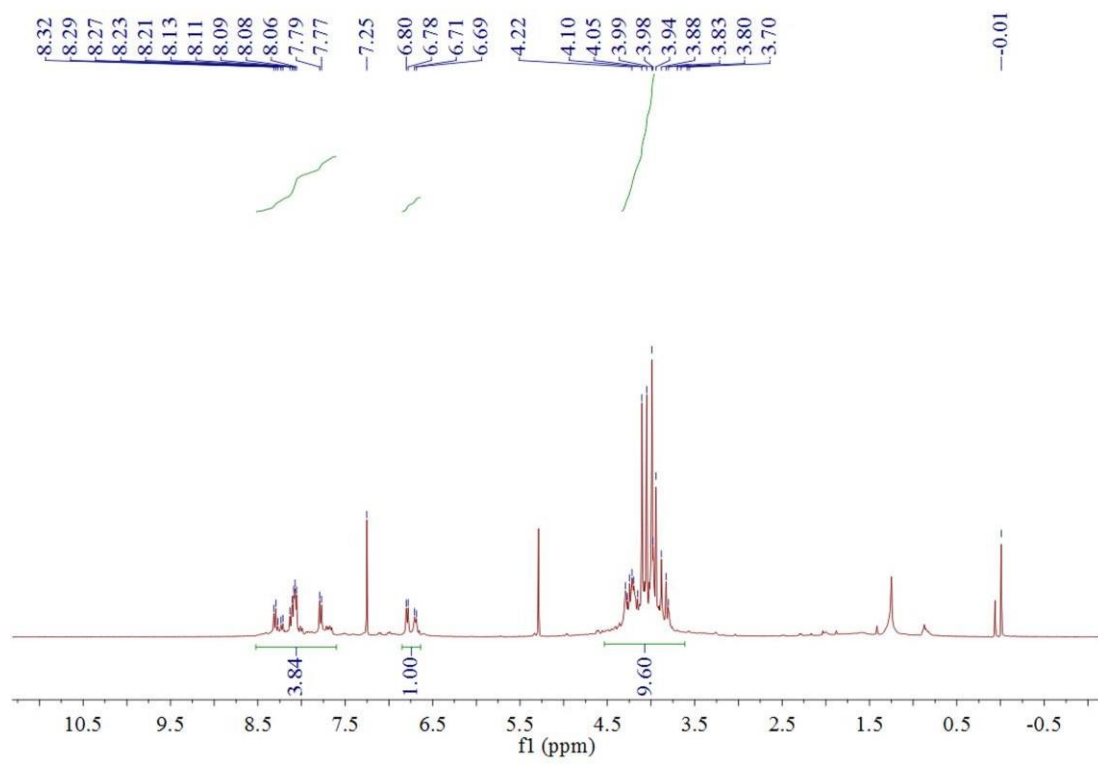

$^1\text{H}$  NMR spectrum of compound **5c**.

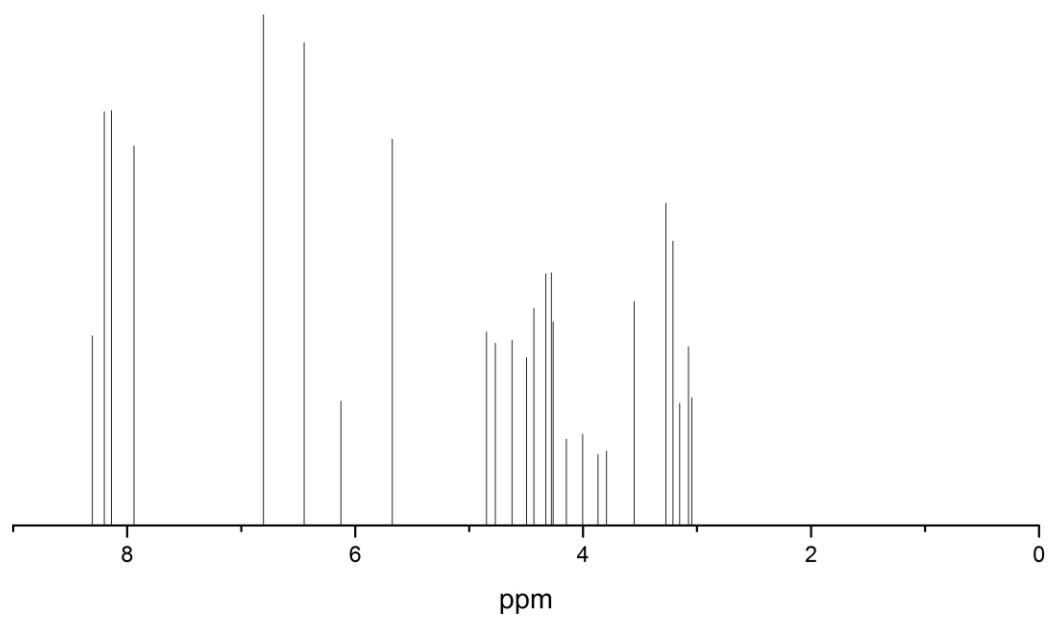

Calculated  $^1\text{H}$  NMR spectrum of compound **5c**.

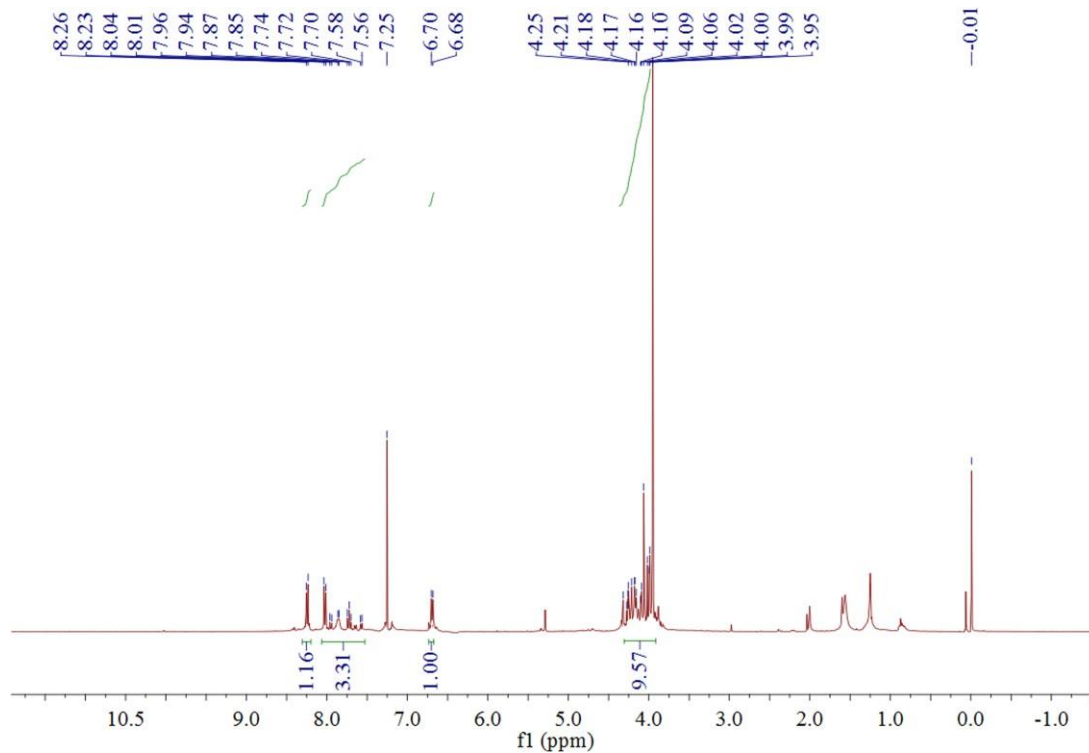

$^1\text{H}$  NMR spectrum of compound **5d**.

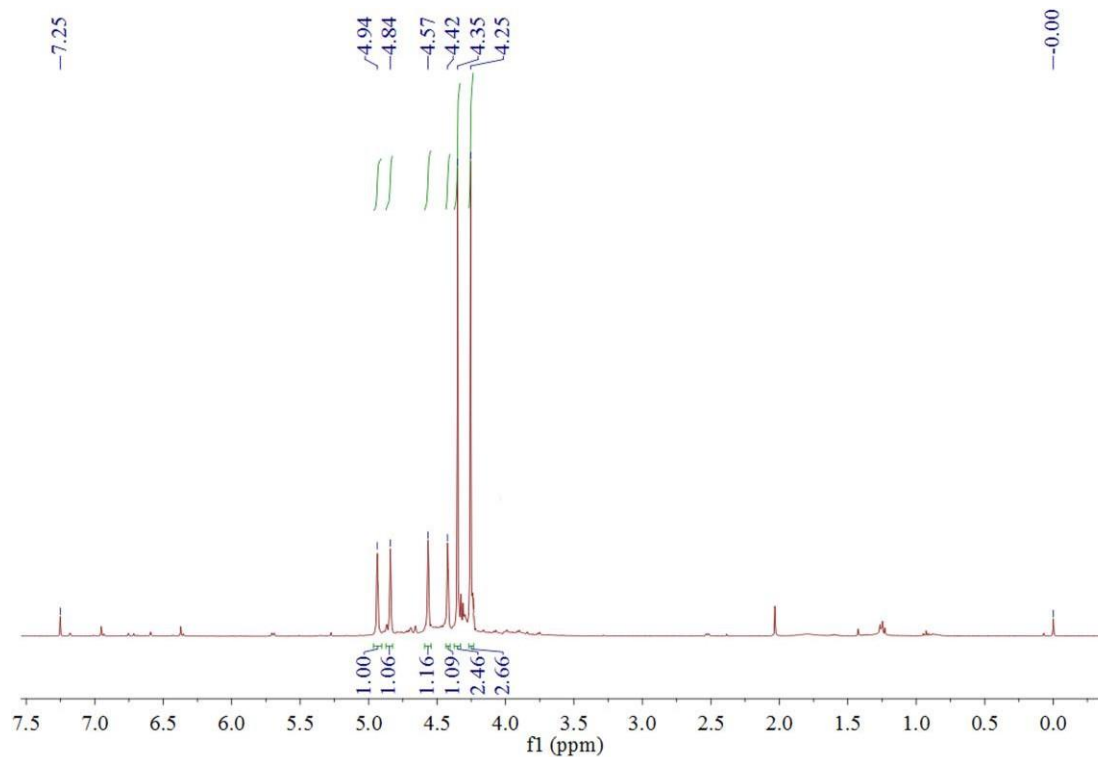

$^1\text{H}$  NMR spectrum of compound **6a**.

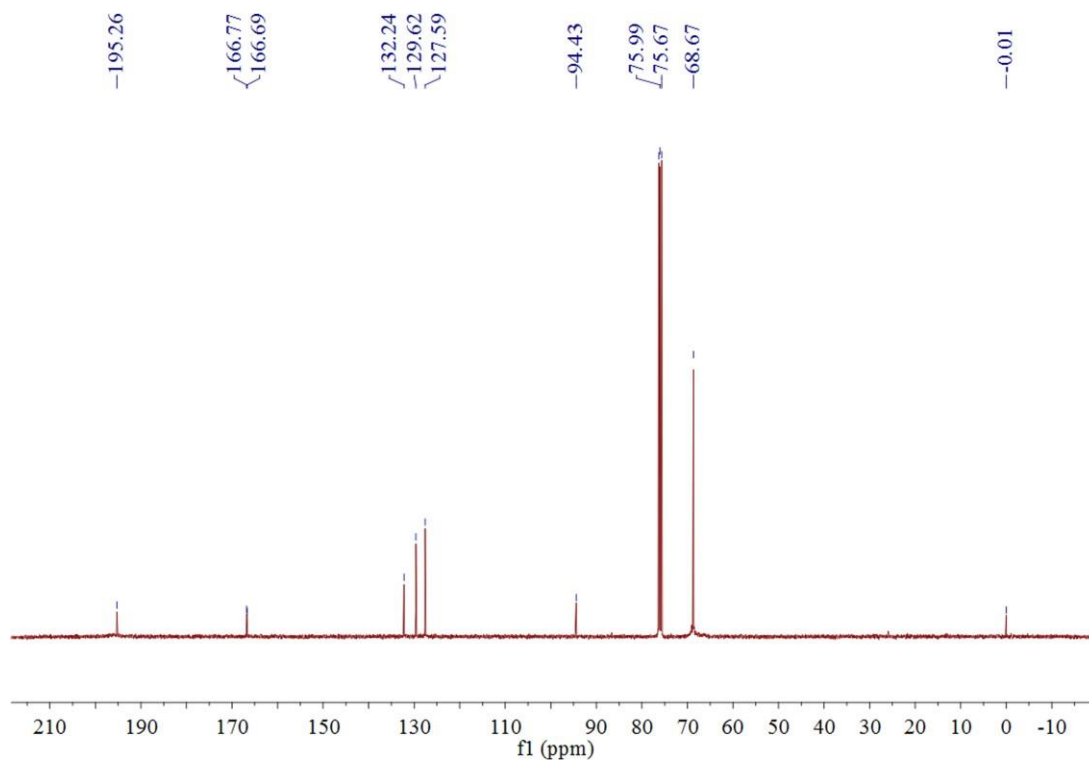

$^{13}\text{C}\{^1\text{H}\}$  NMR spectrum of compound **1a**.

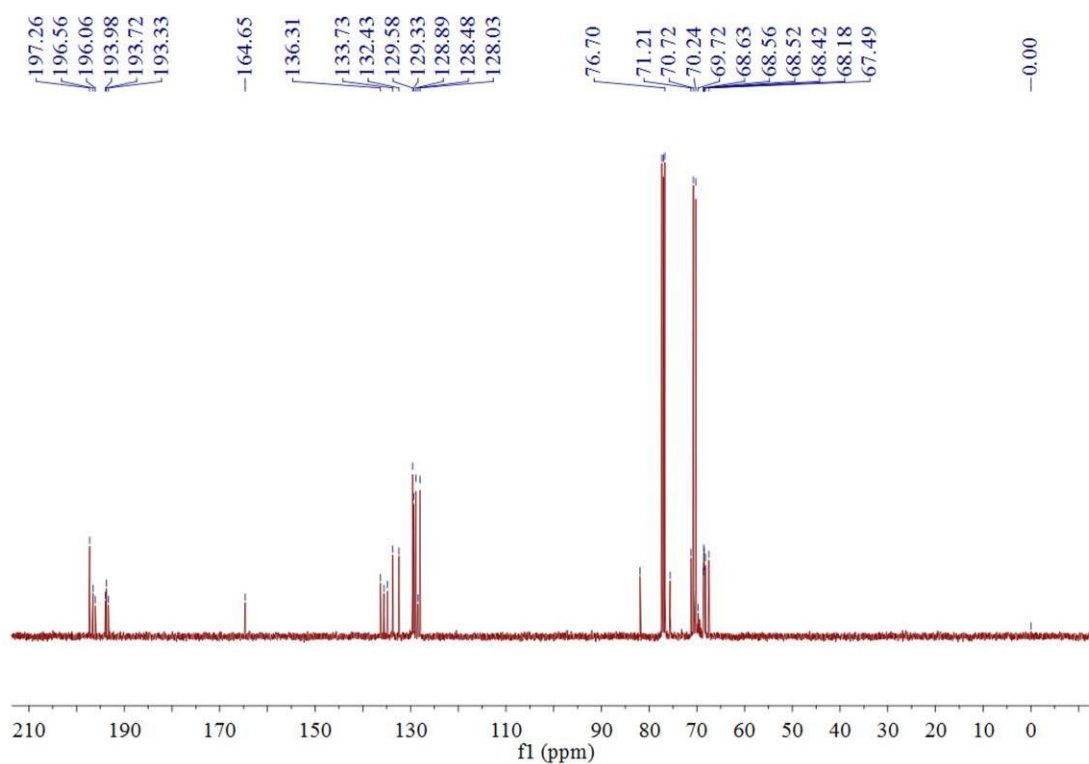

$^{13}\text{C}\{^1\text{H}\}$  NMR spectrum of compound **1b**.

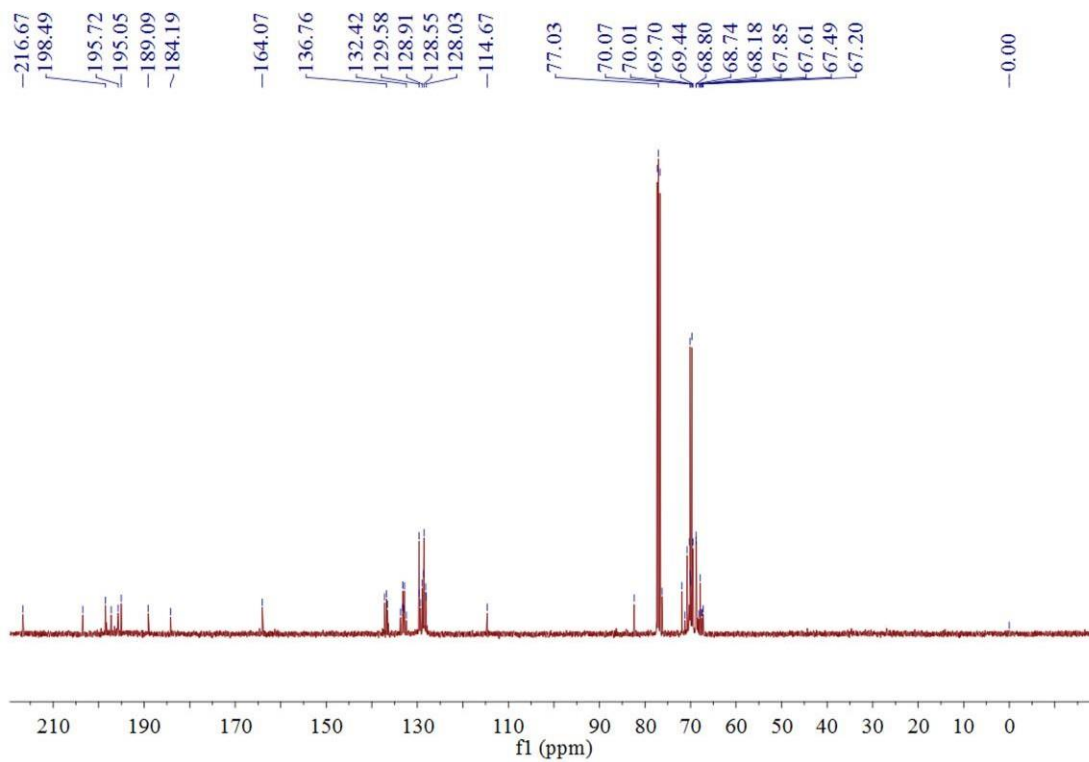

$^{13}\text{C}\{^1\text{H}\}$  NMR spectrum of compound **1c**.

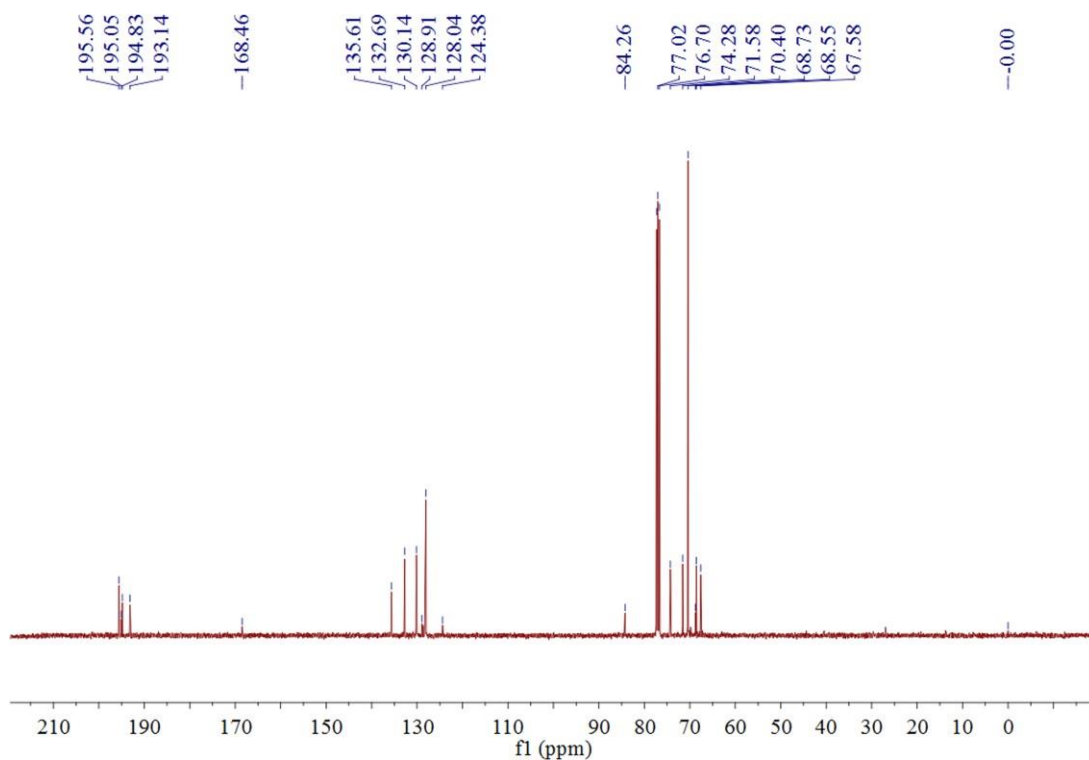

$^{13}\text{C}\{^1\text{H}\}$  NMR spectrum of compound **1d**.

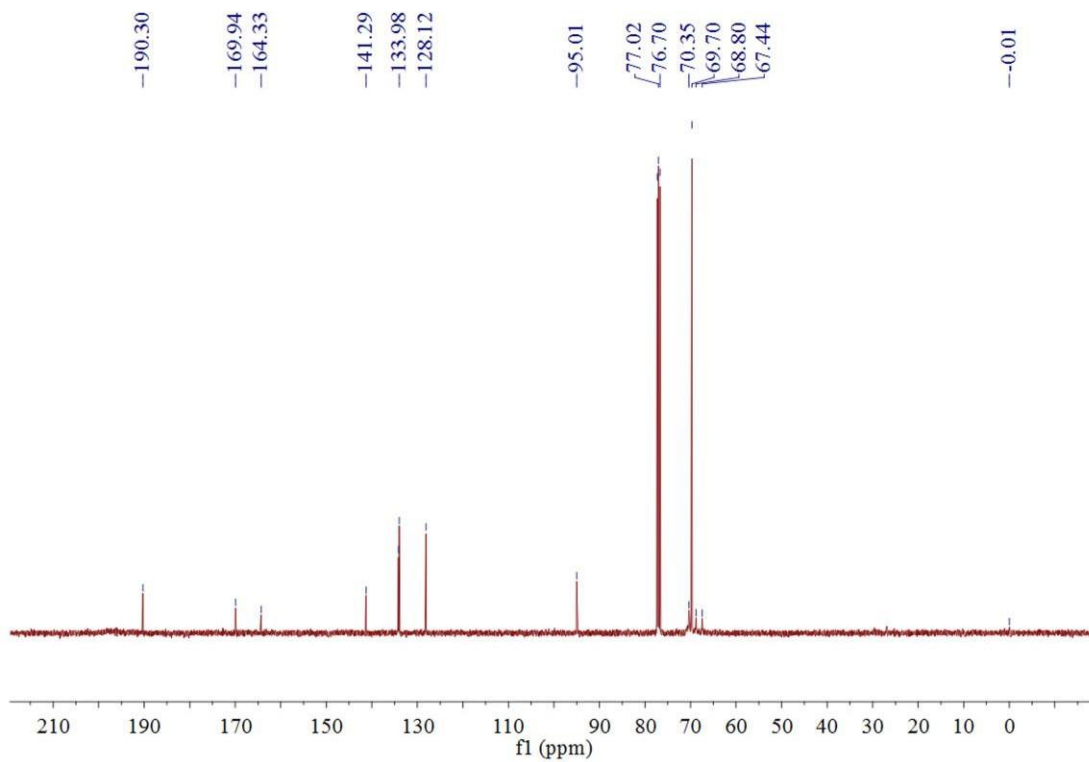

$^{13}\text{C}\{^1\text{H}\}$  NMR spectrum of compound **2a**.

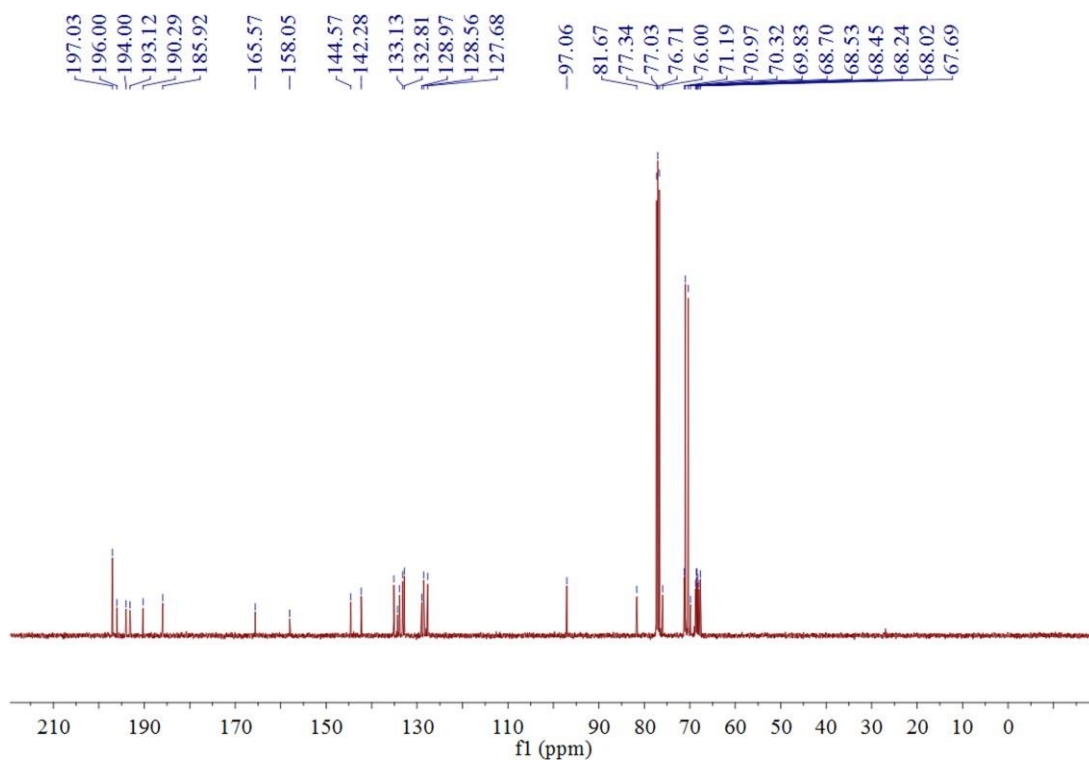

$^{13}\text{C}\{^1\text{H}\}$  NMR spectrum of compound **2b**.



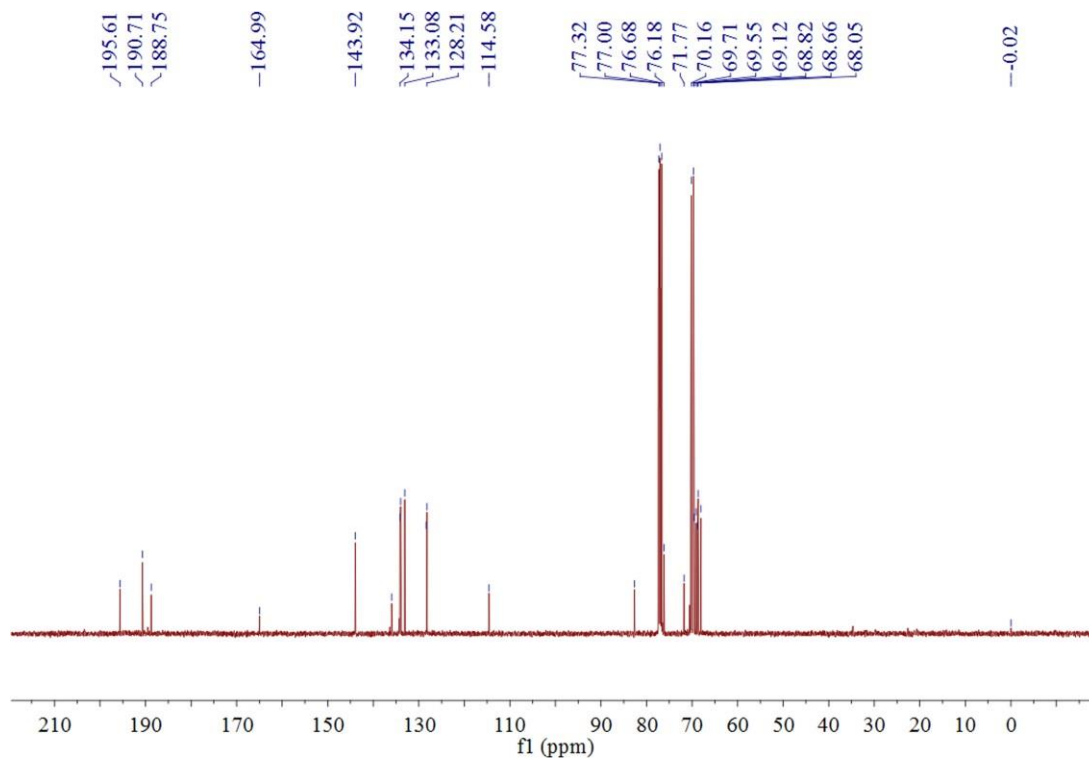

$^{13}\text{C}\{^1\text{H}\}$  NMR spectrum of compound **2c**.

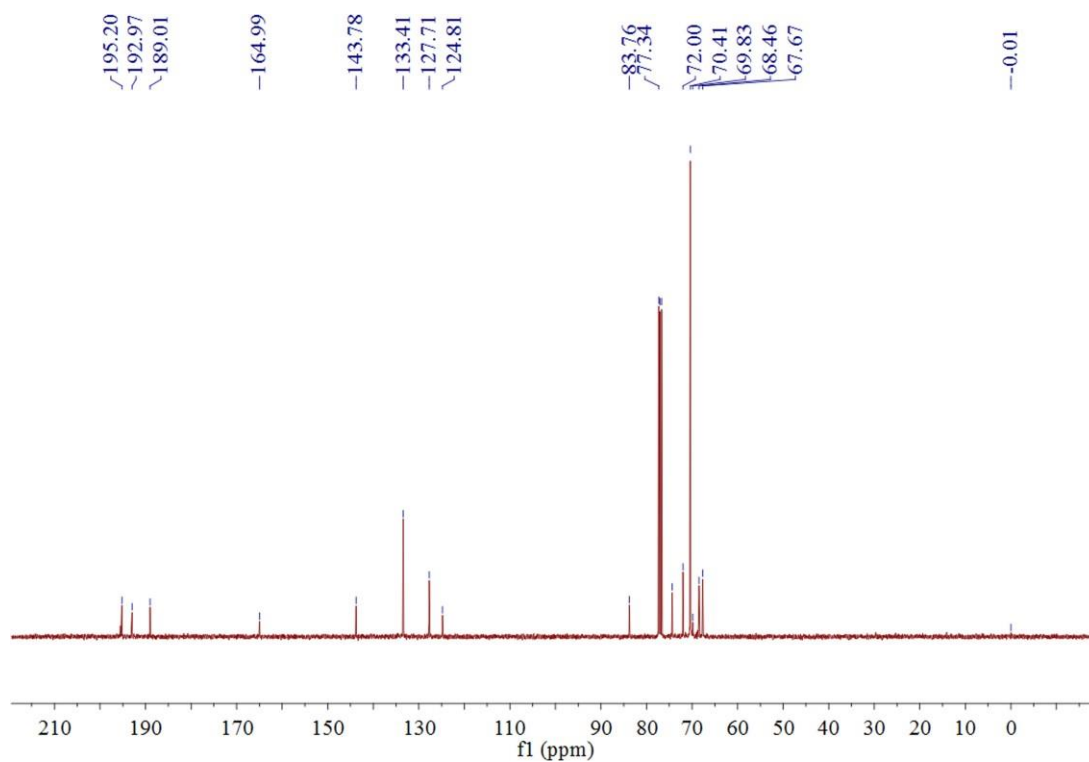

$^{13}\text{C}\{^1\text{H}\}$  NMR spectrum of compound **2d**.

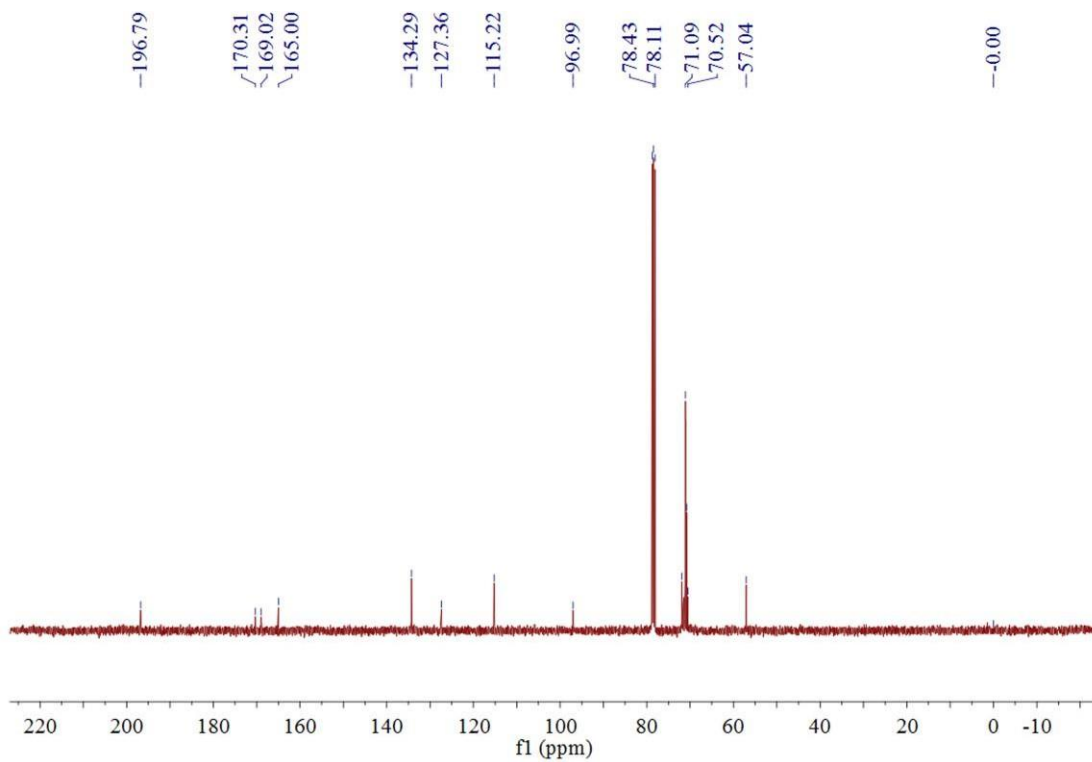

$^{13}\text{C}\{^1\text{H}\}$  NMR spectrum of compound **3a**.

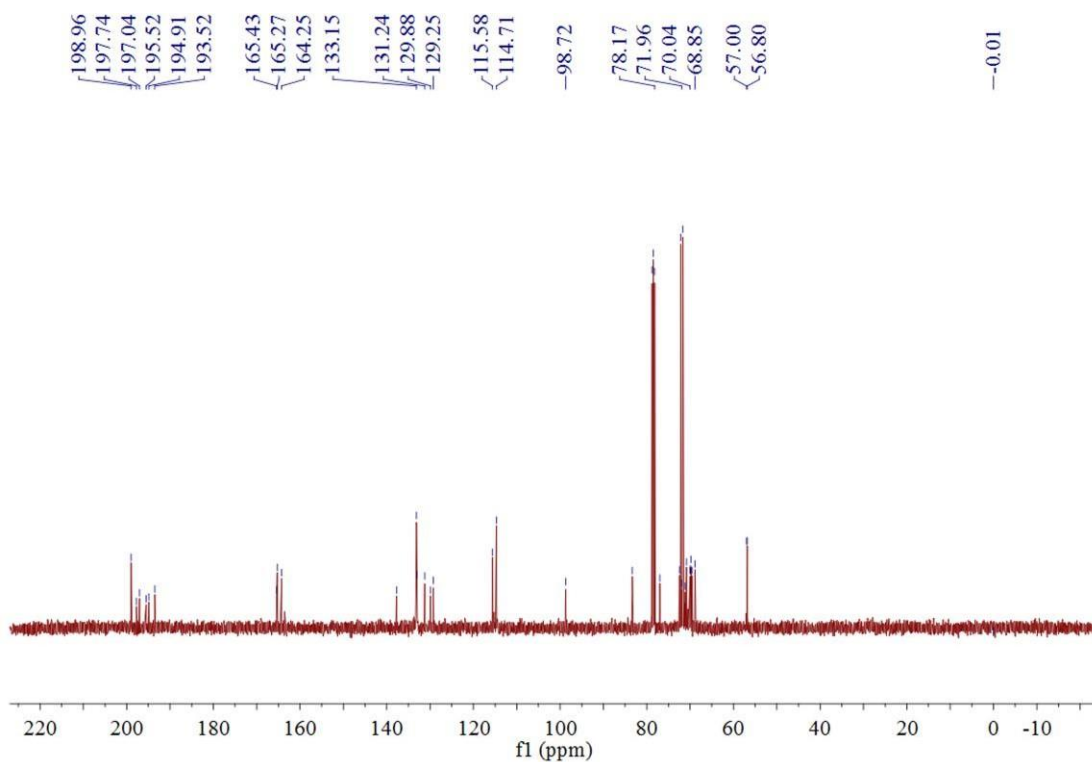

$^{13}\text{C}\{^1\text{H}\}$  NMR spectrum of compound **3b**.

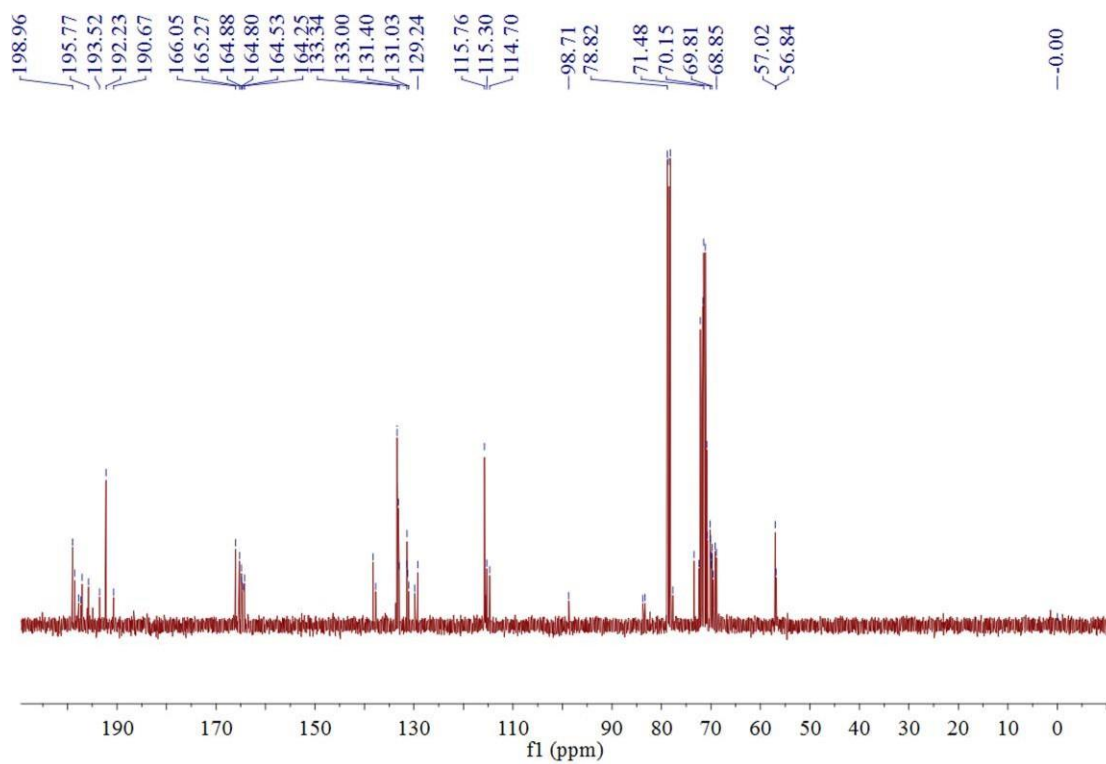

$^{13}\text{C}\{^1\text{H}\}$  NMR spectrum of compound **3c**.

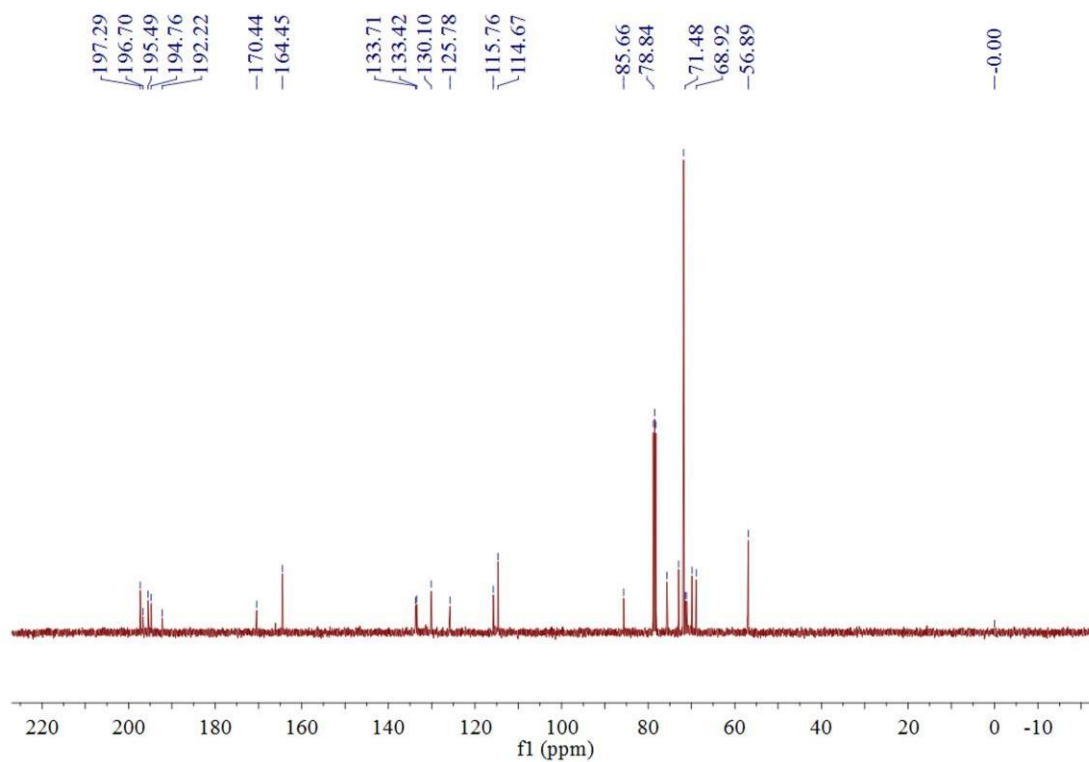

$^{13}\text{C}\{^1\text{H}\}$  NMR spectrum of compound **3d**.

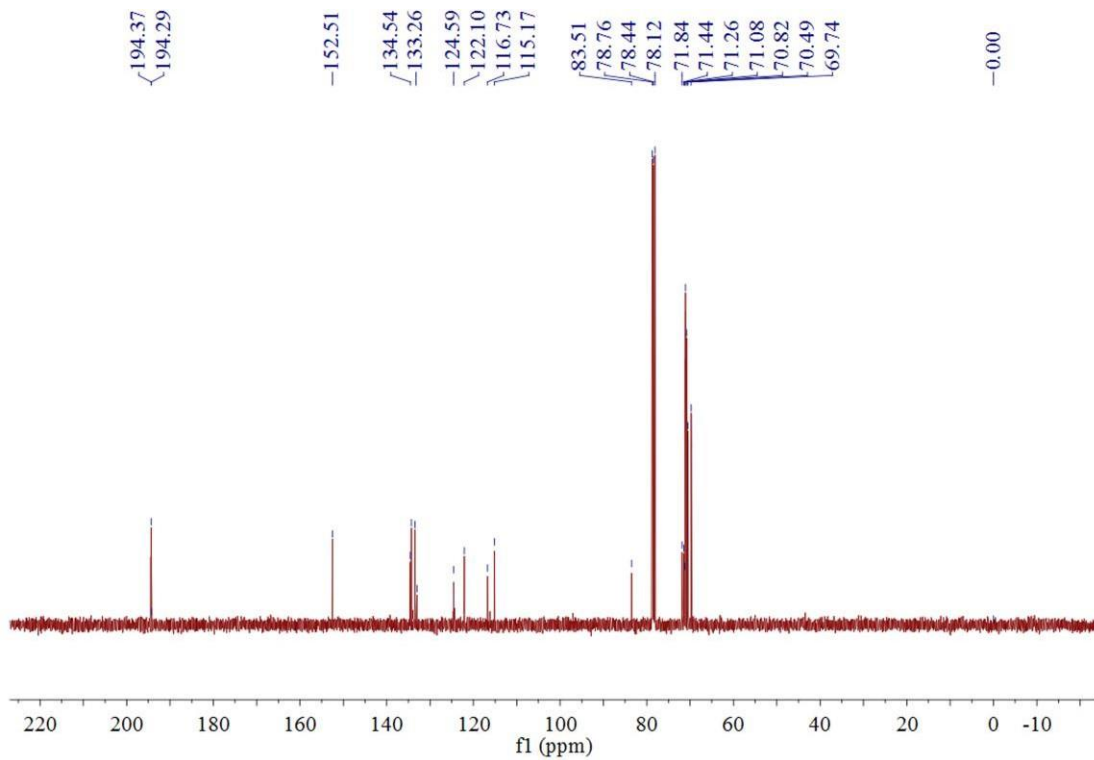

$^{13}\text{C}\{^1\text{H}\}$  NMR spectrum of compound **4a**.

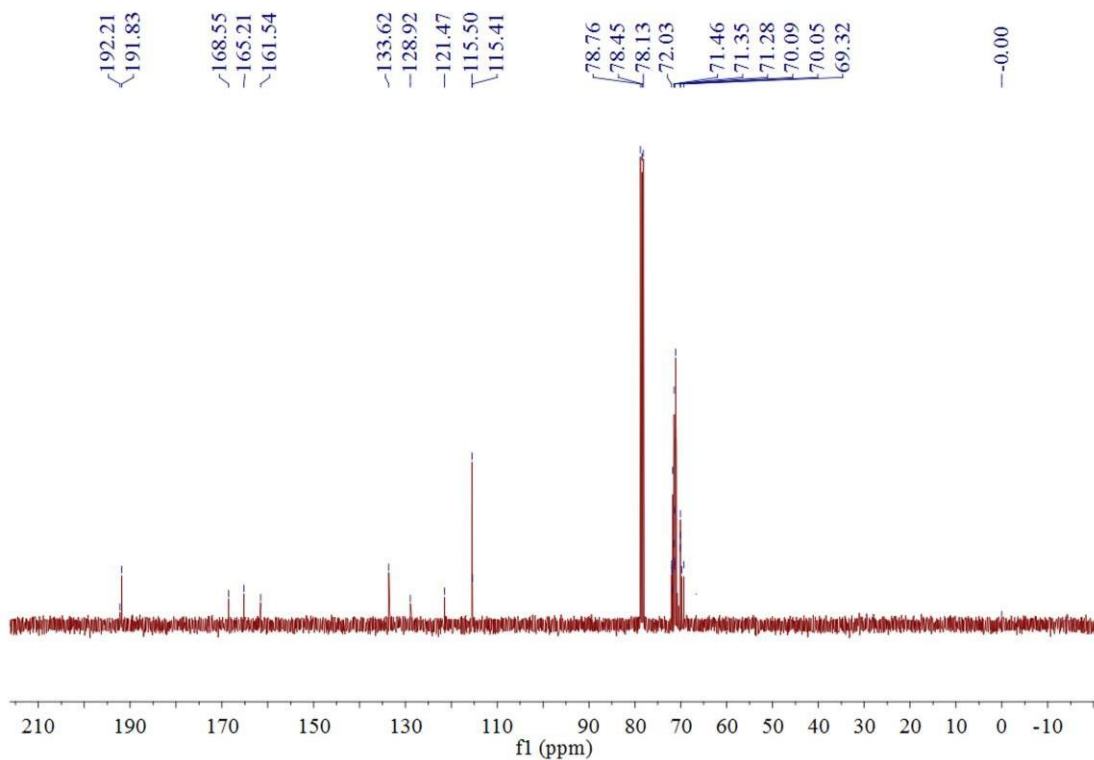

$^{13}\text{C}\{^1\text{H}\}$  NMR spectrum of compound **4b**.

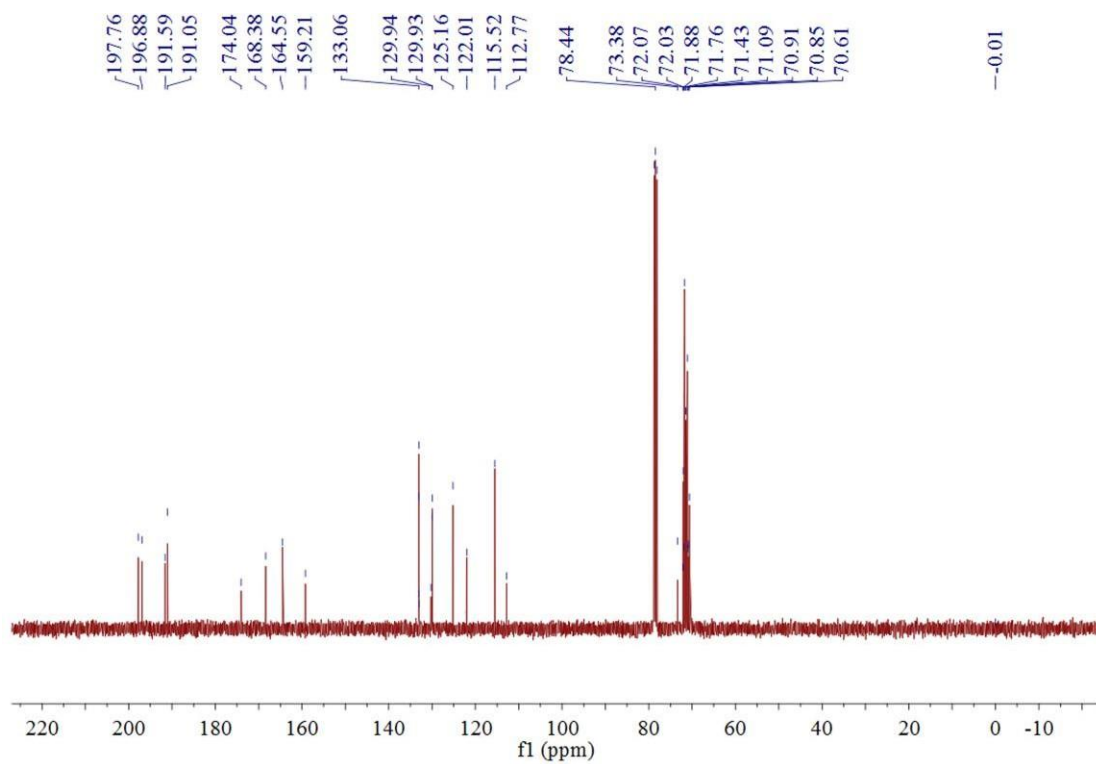

$^{13}\text{C}\{^1\text{H}\}$  NMR spectrum of compound **4c**.

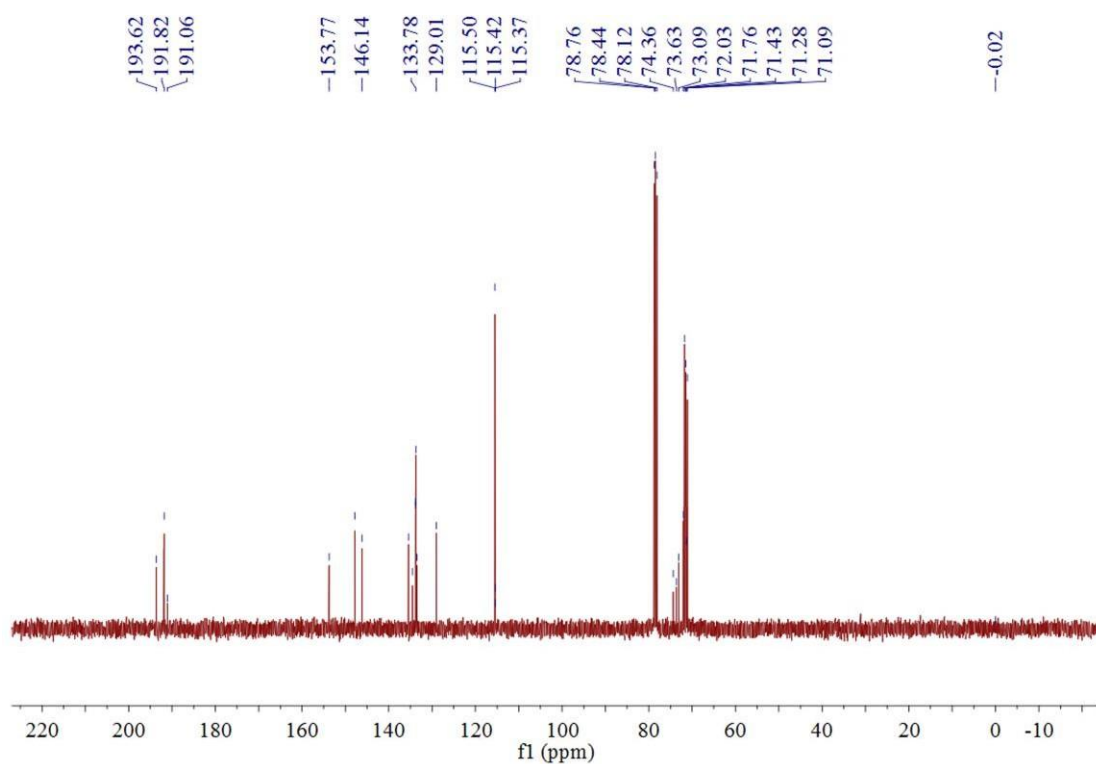

$^{13}\text{C}\{^1\text{H}\}$  NMR spectrum of compound **4d**.

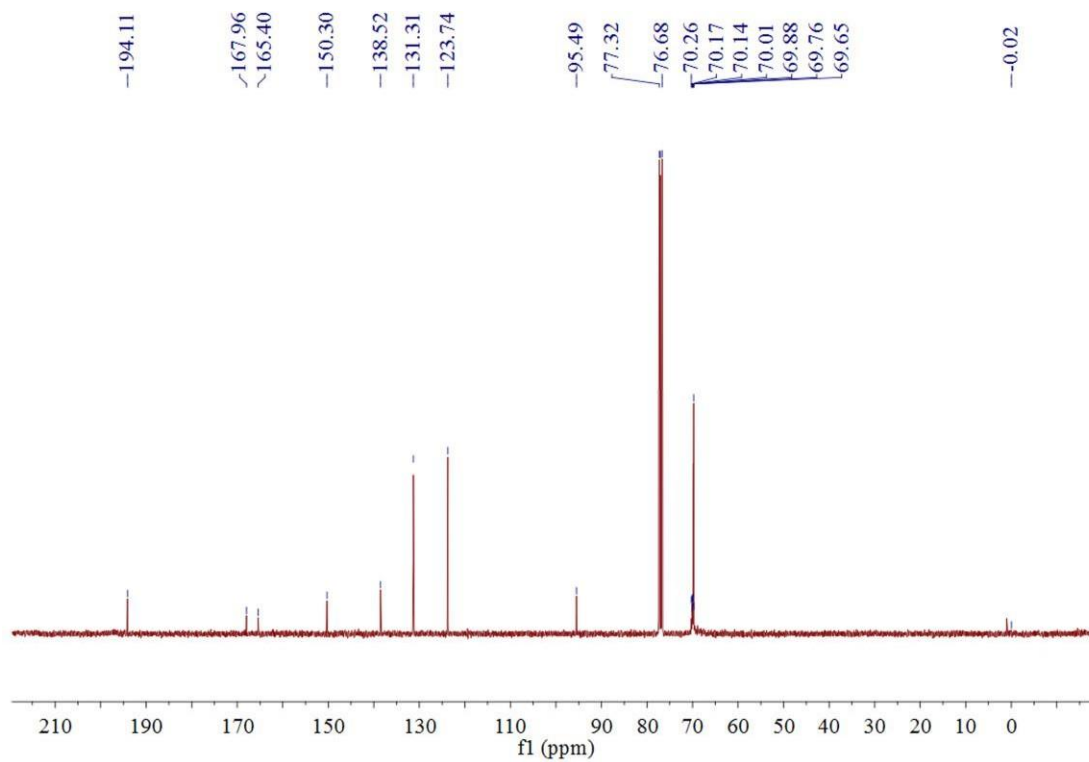

$^{13}\text{C}\{^1\text{H}\}$  NMR spectrum of compound **5a**.

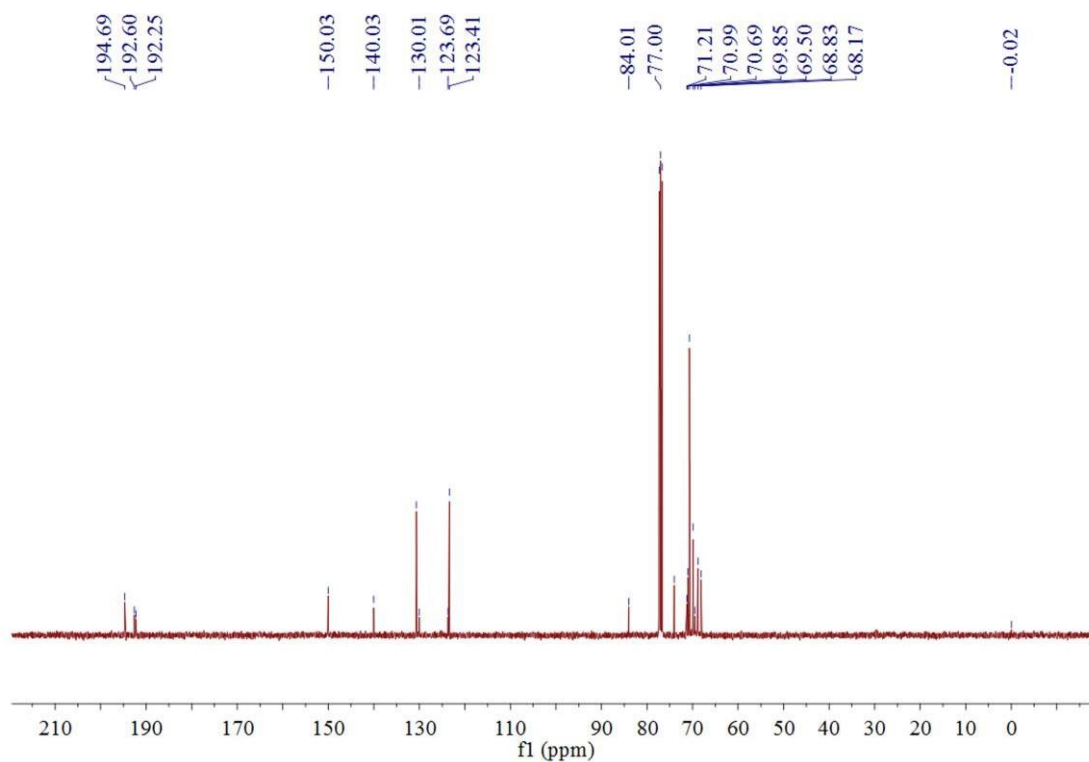

$^{13}\text{C}\{^1\text{H}\}$  NMR spectrum of compound **5b**.

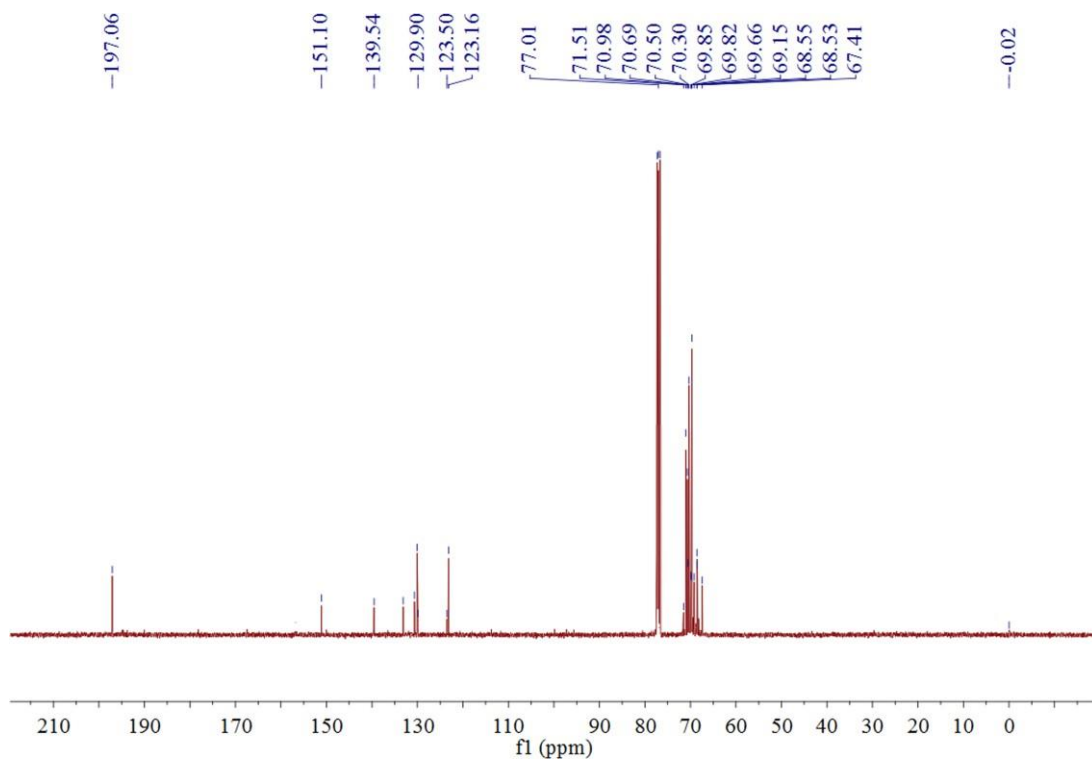

$^{13}\text{C}\{^1\text{H}\}$  NMR spectrum of compound **5c**.

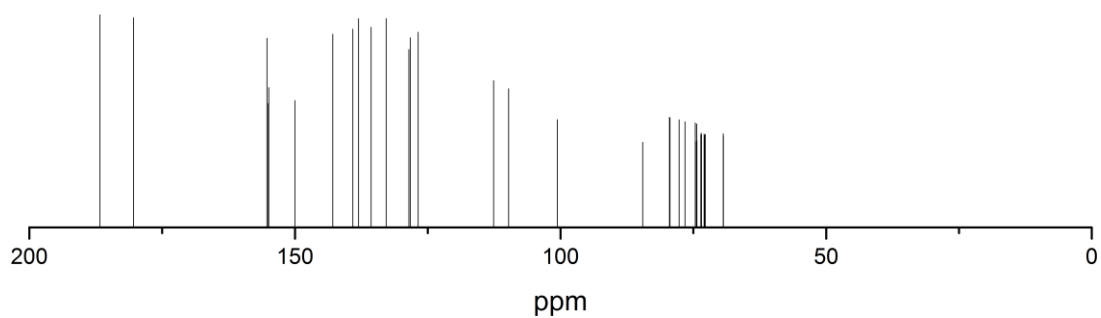

Calculated  $^{13}\text{C}\{^1\text{H}\}$  NMR spectrum of compound **5c**.

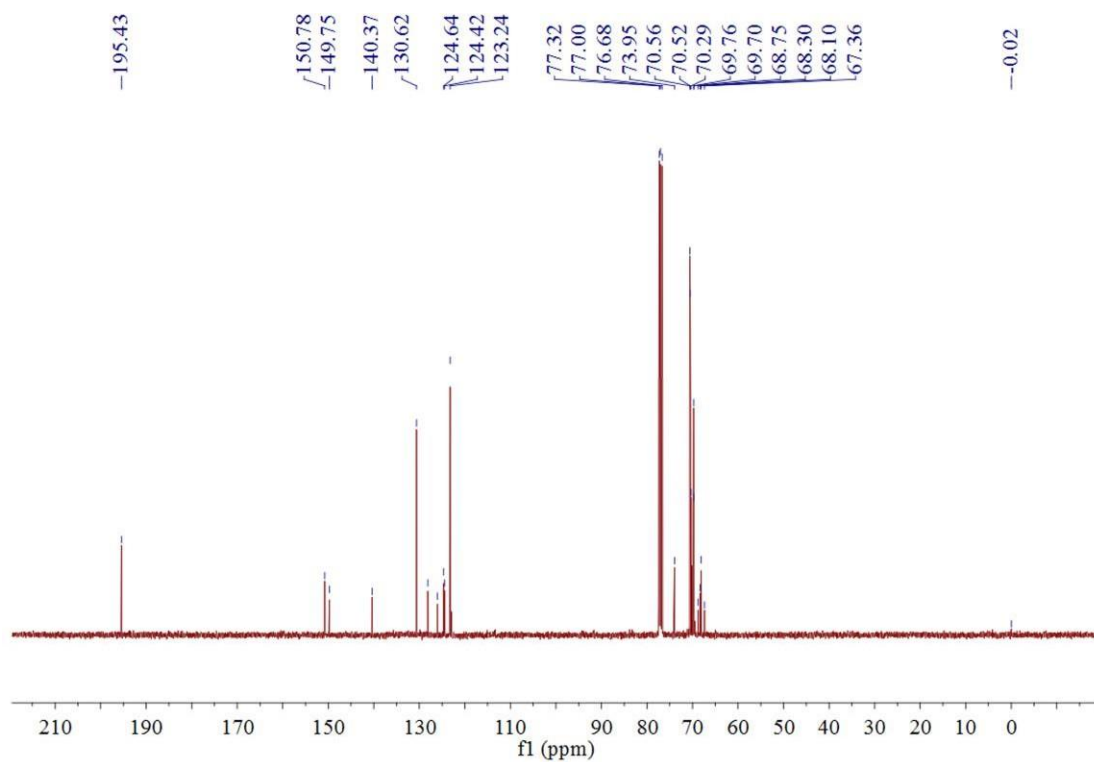

$^{13}\text{C}\{^1\text{H}\}$  NMR spectrum of compound **5d**.

+

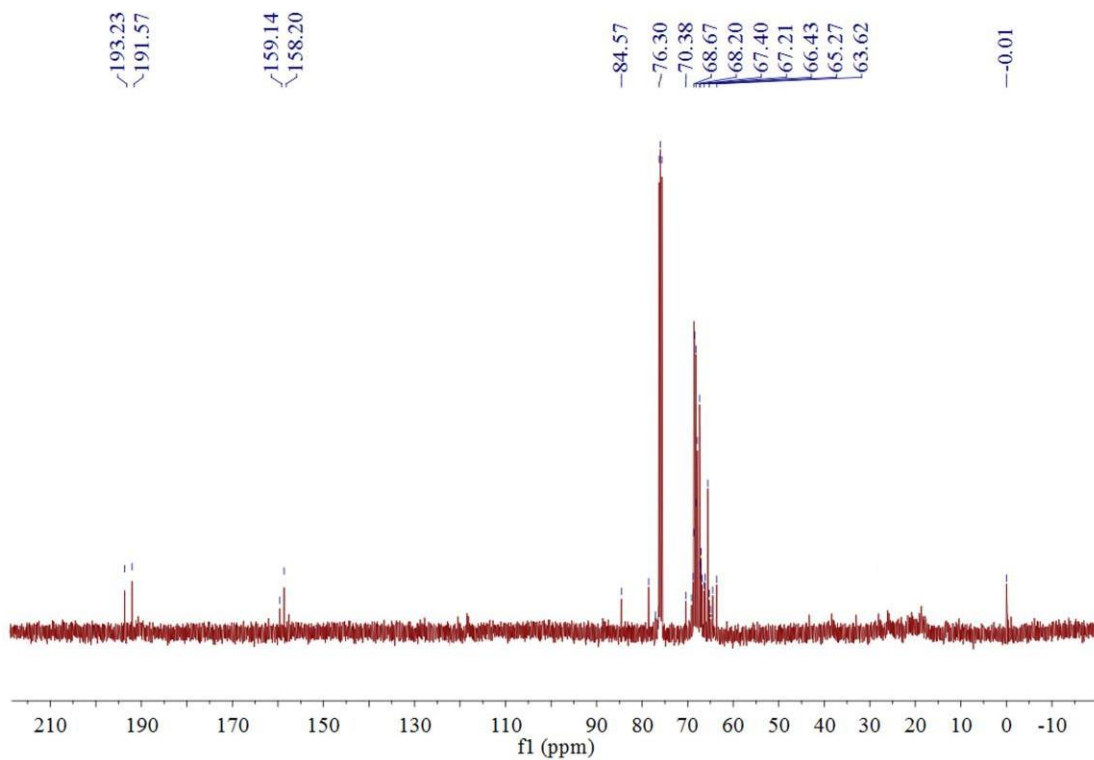

$^{13}\text{C}\{^1\text{H}\}$  NMR spectrum of compound **6a**.



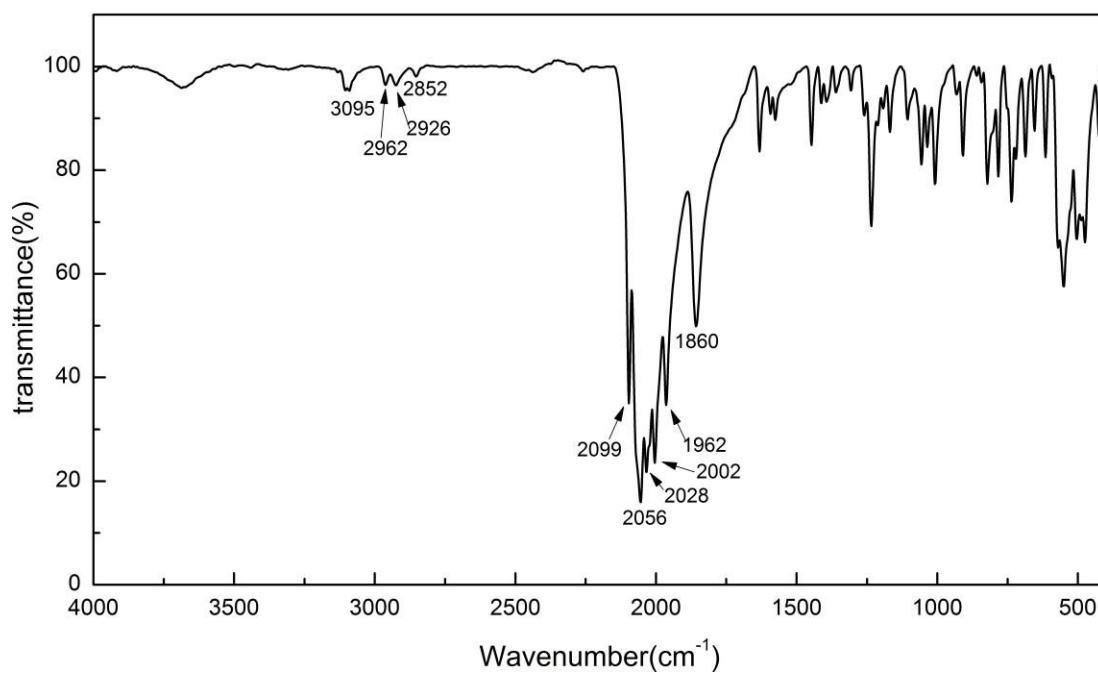

IR spectrum of compound **1a**.

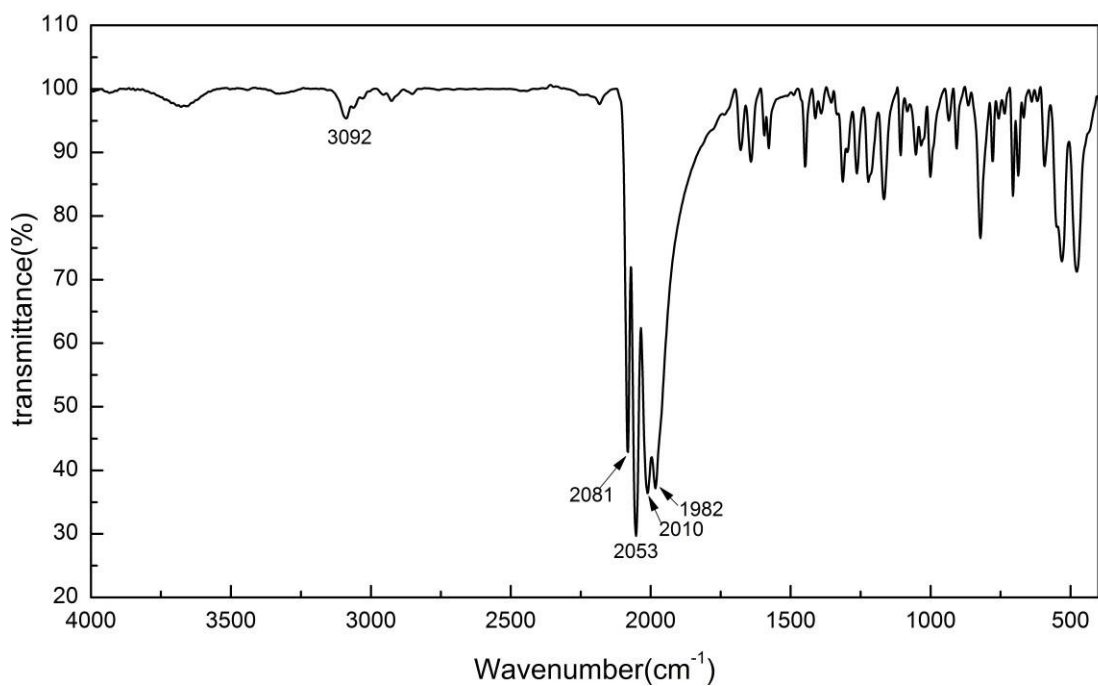

IR spectrum of compound **1b**.

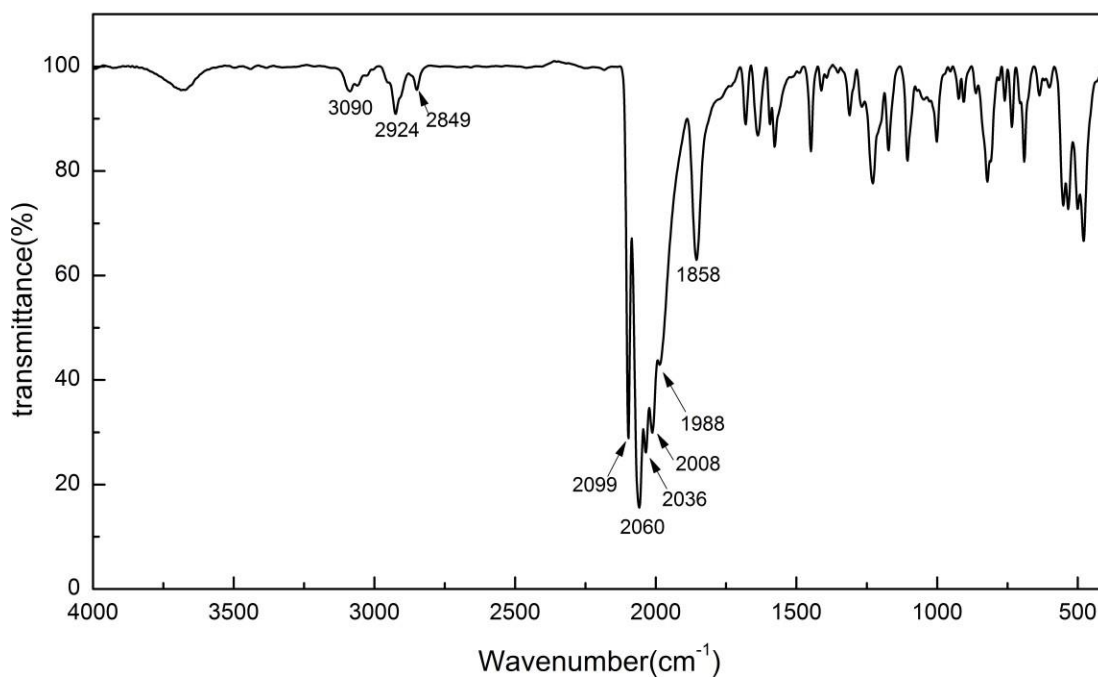

IR spectrum of compound **1c**.

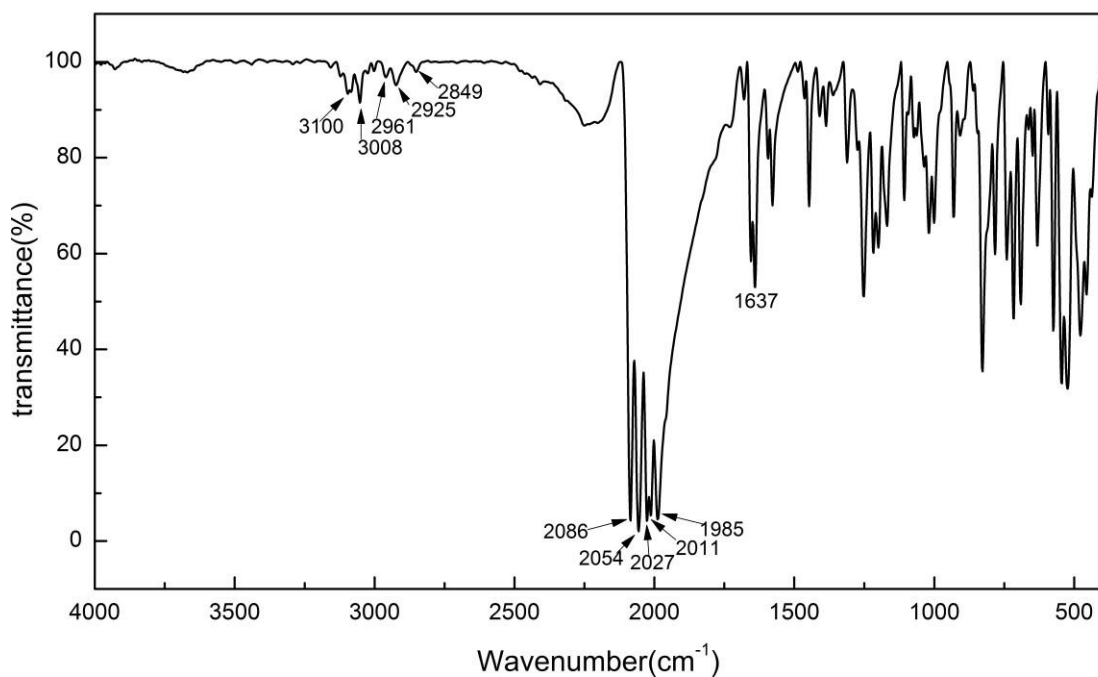

IR spectrum of compound **1d**.

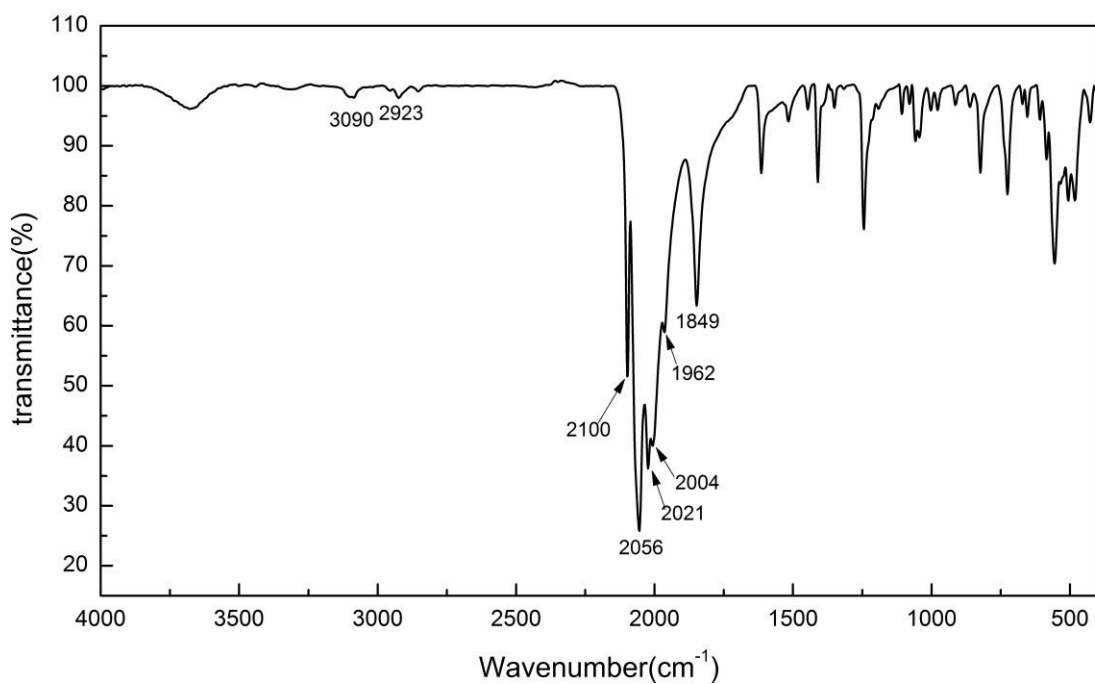

IR spectrum of compound **2a**.

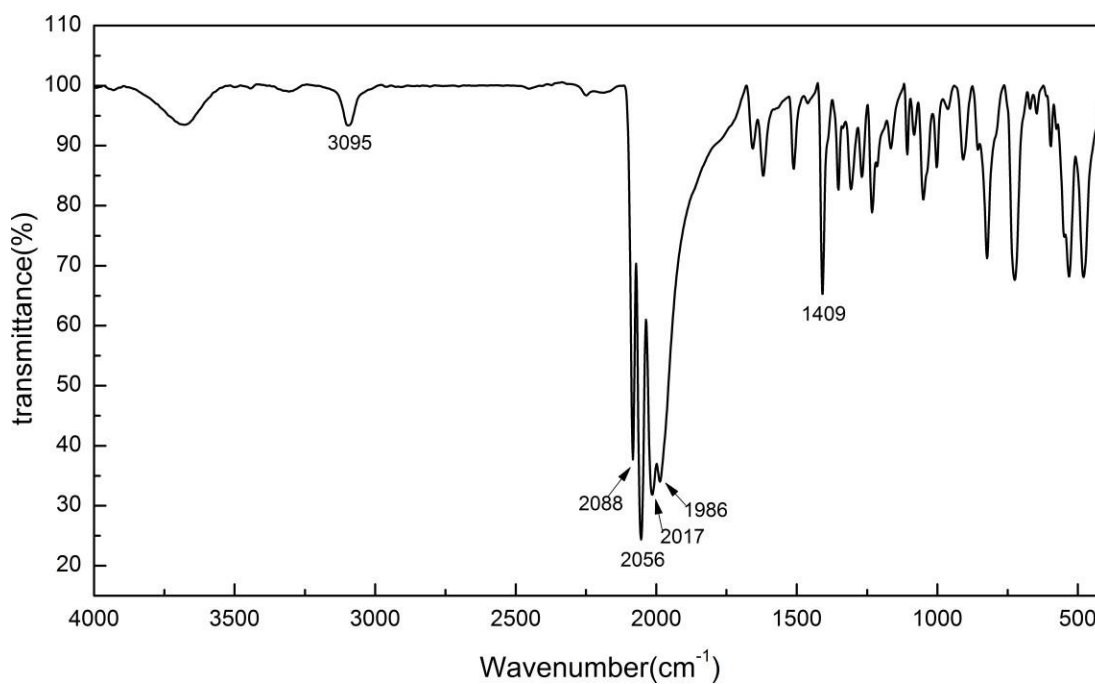

IR spectrum of compound **2b**.

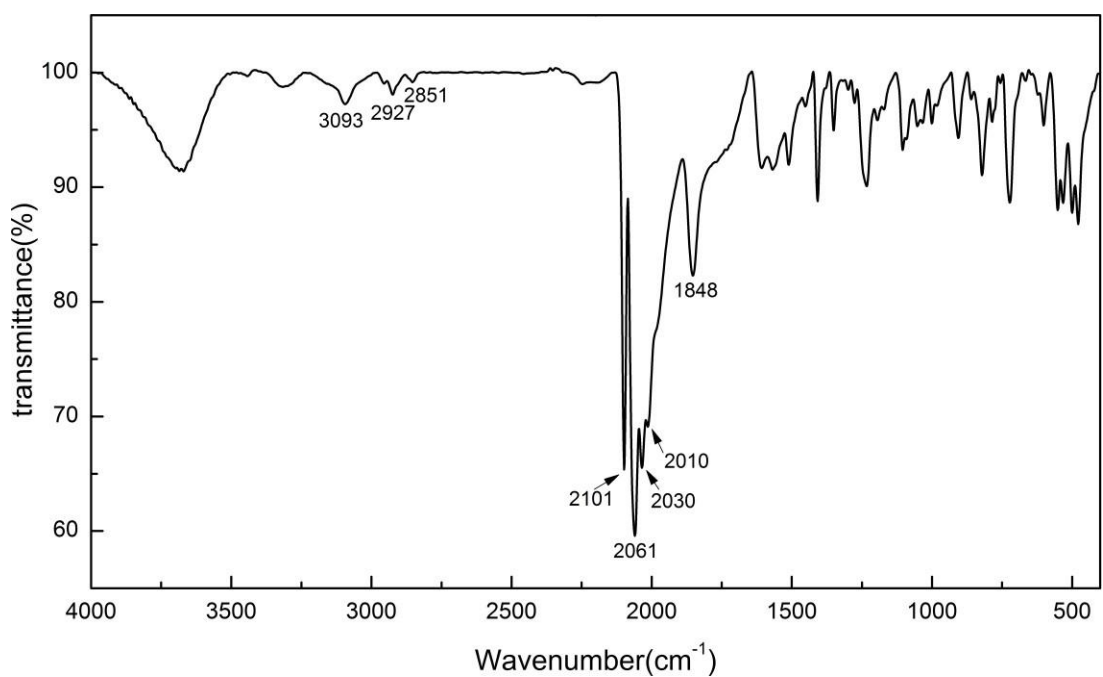

IR spectrum of compound **2c**.

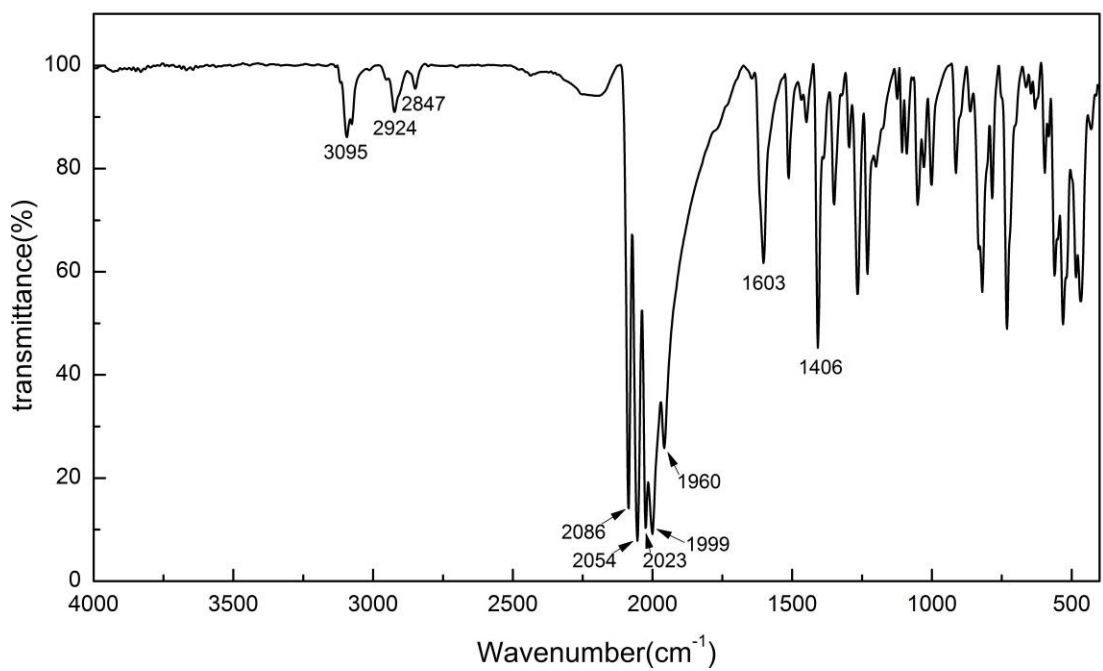

IR spectrum of compound **2d**.

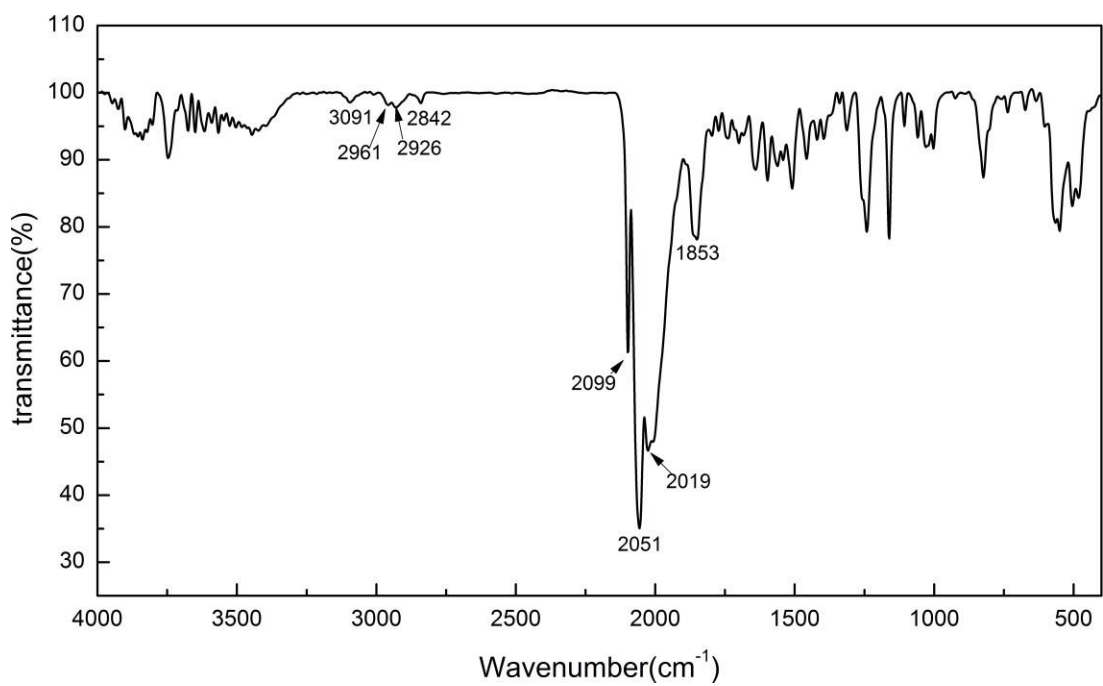

IR spectrum of compound **3a**.

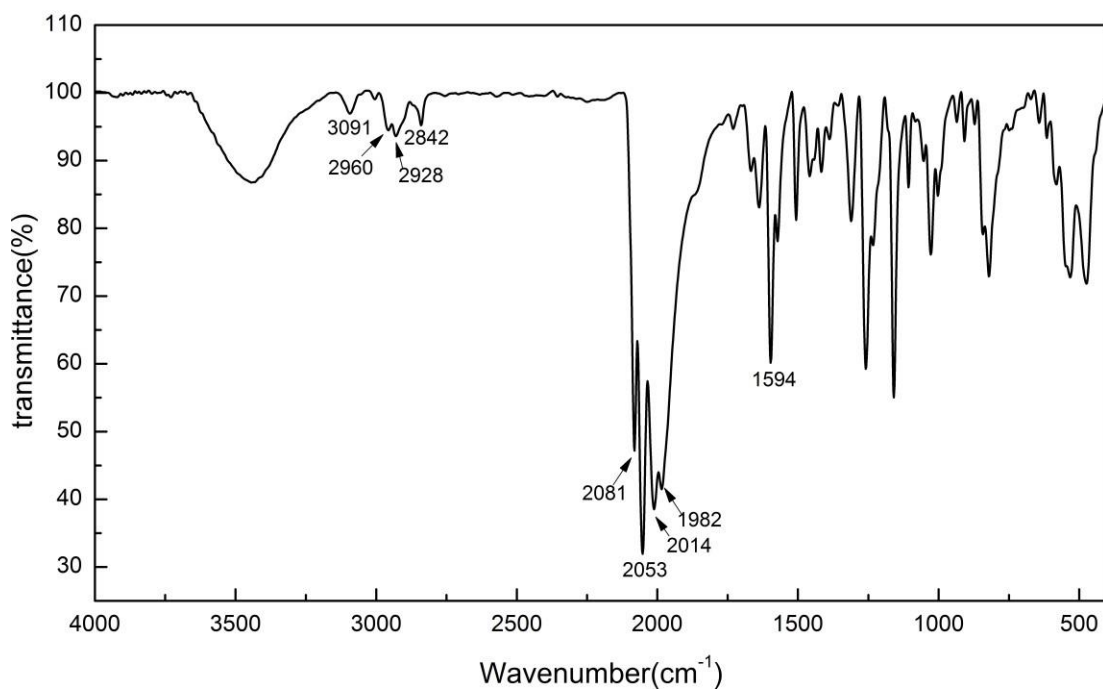

IR spectrum of compound **3b**.

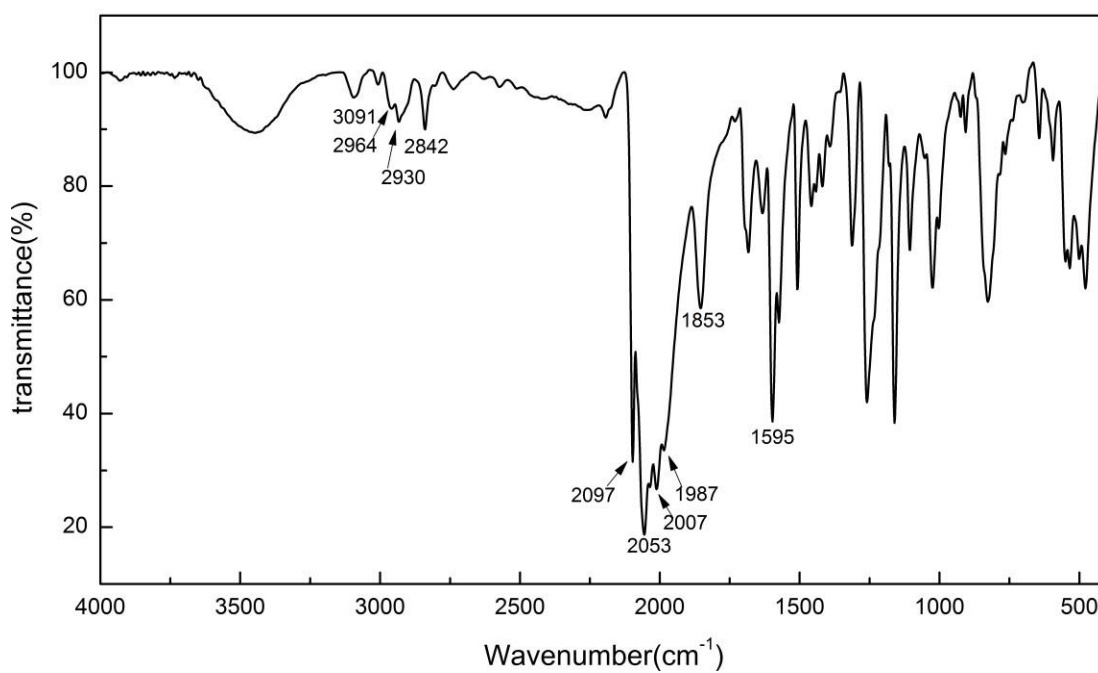

IR spectrum of compound **3c**.

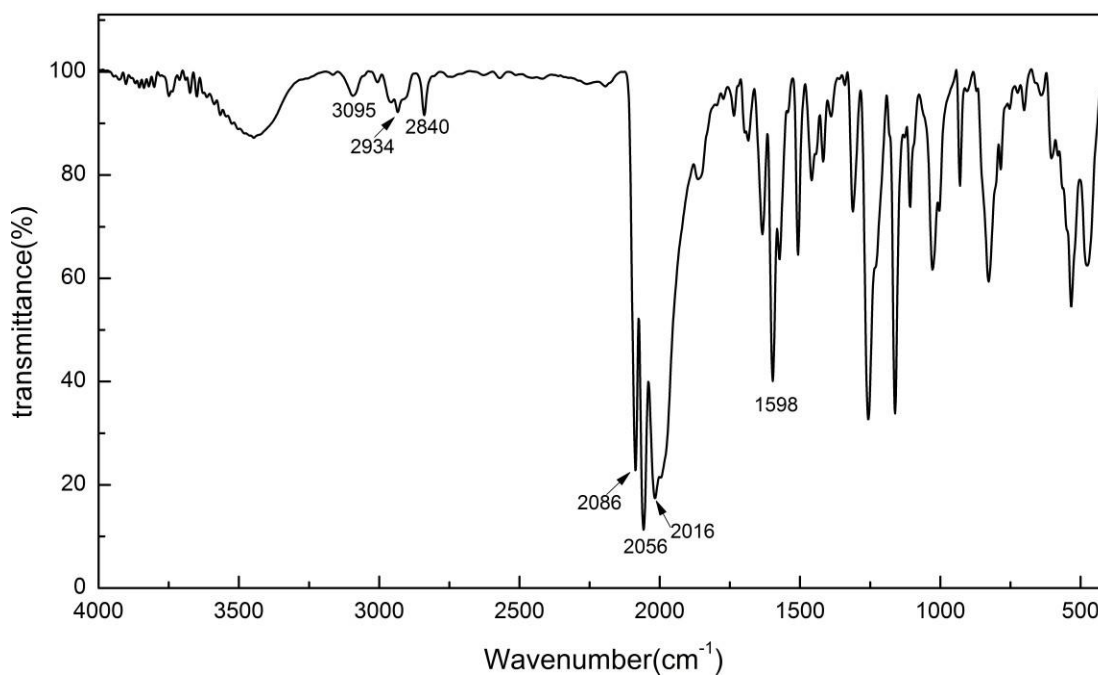

IR spectrum of compound **3d**.

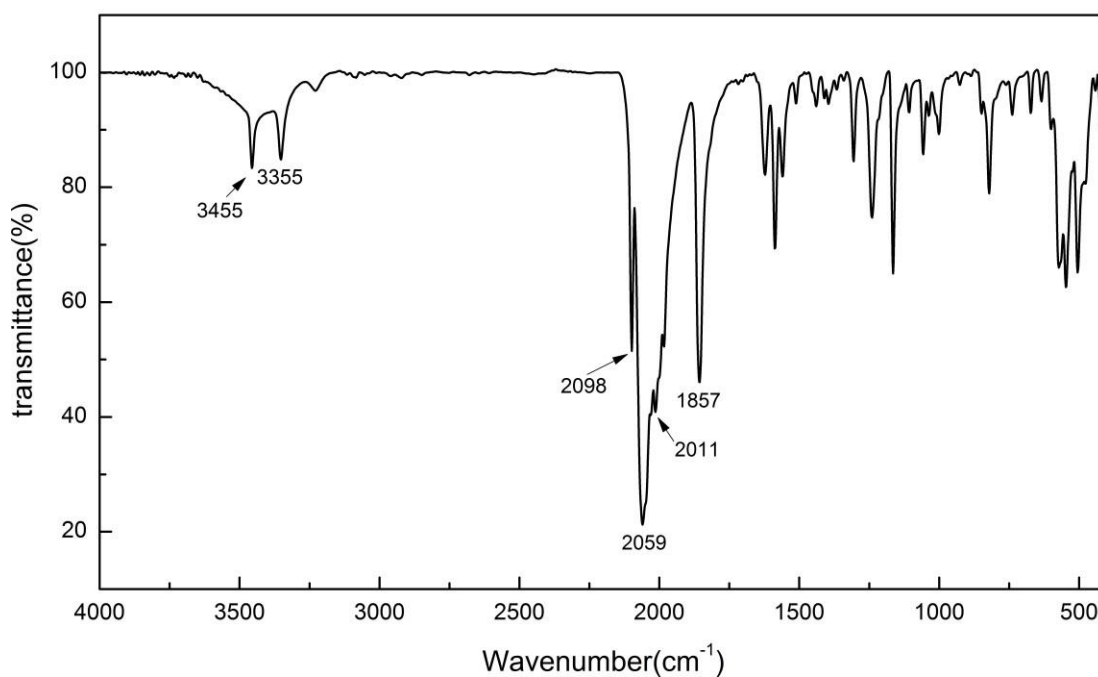

IR spectrum of compound **4a**.

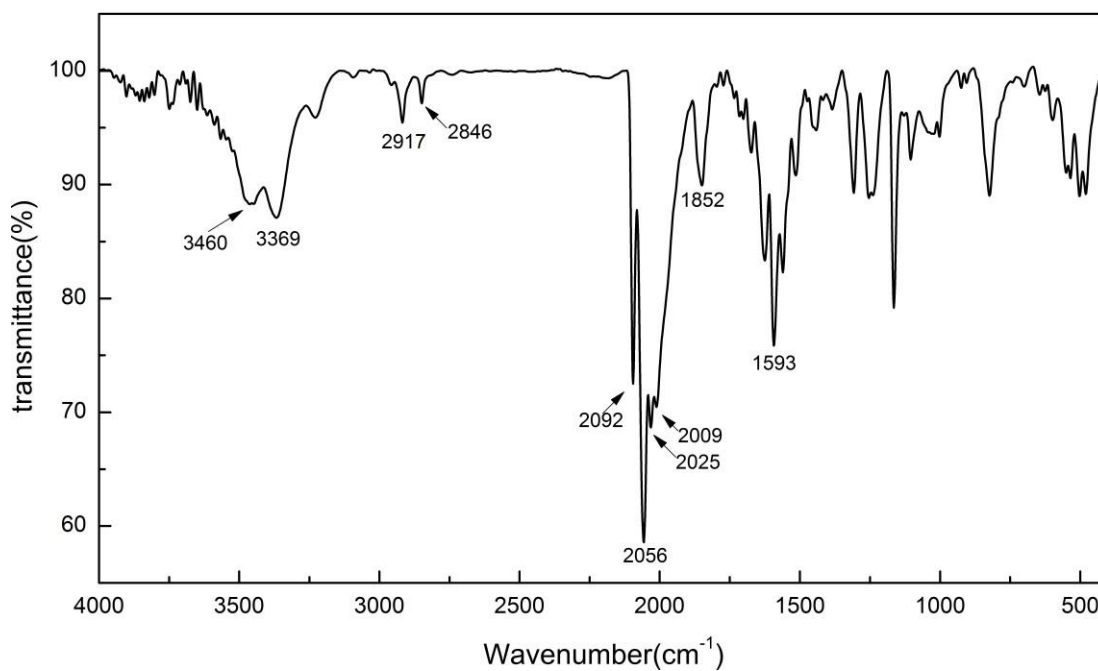

IR spectrum of compound **4b**.

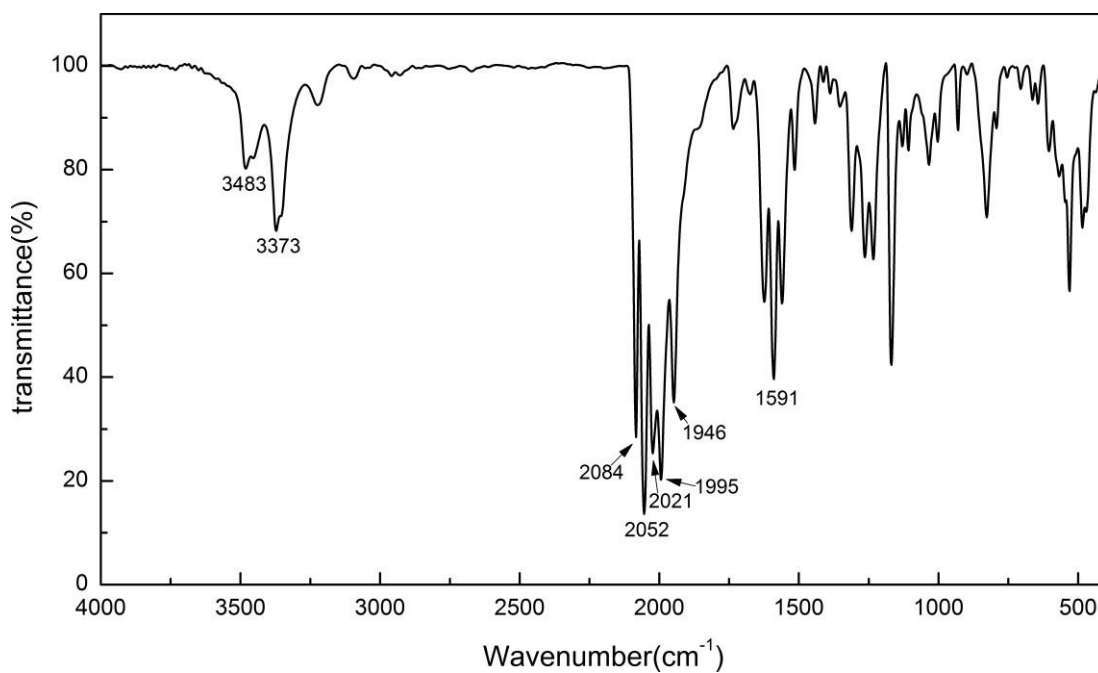

IR spectrum of compound **4c**.

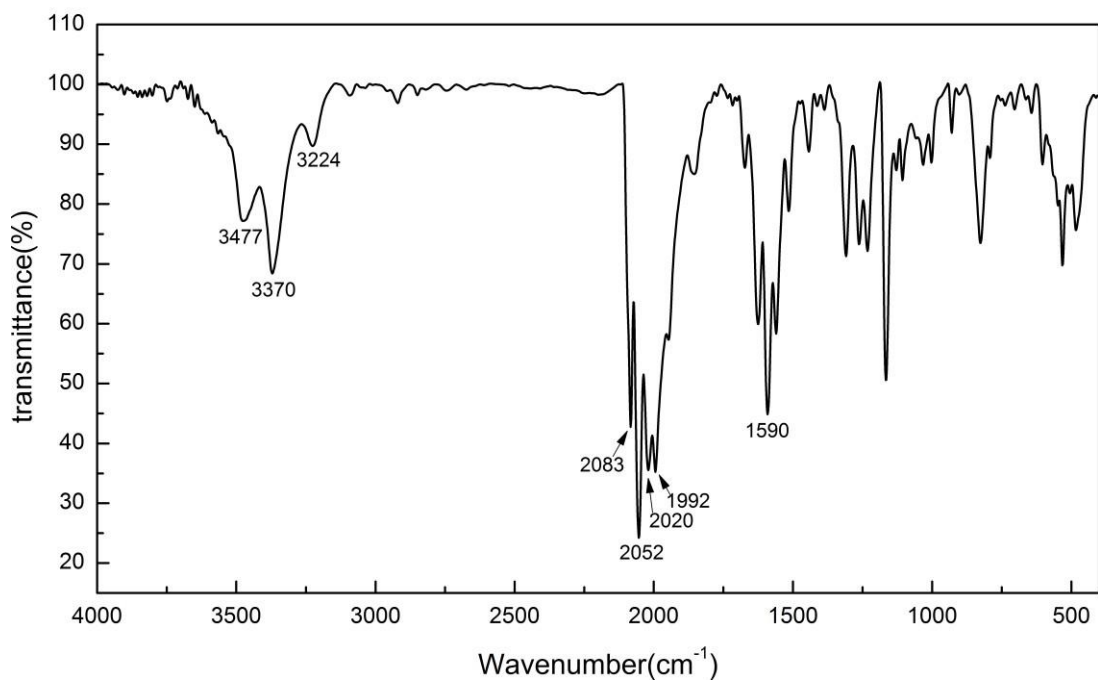

IR spectrum of compound **4d**.



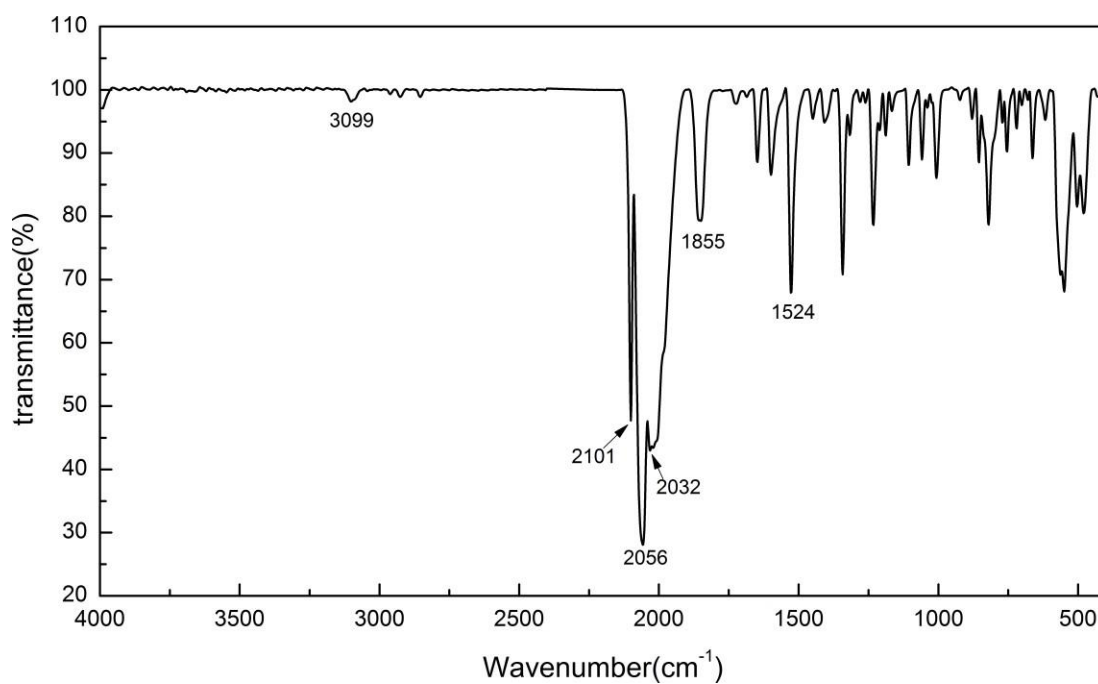

IR spectrum of compound **5a**.

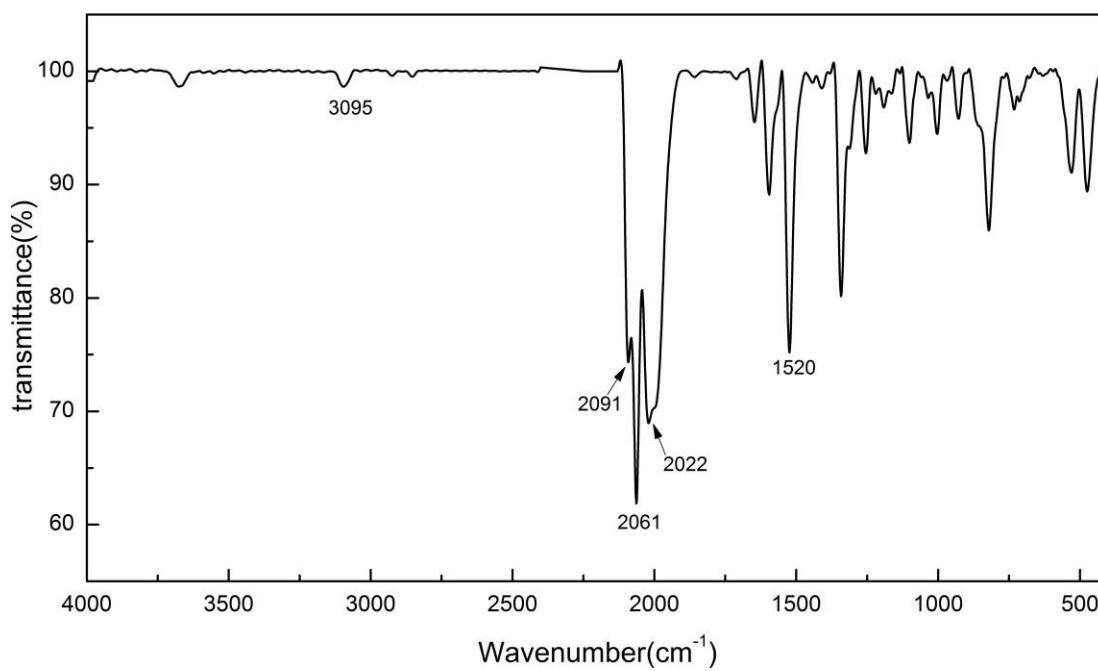

IR spectrum of compound **5b**.

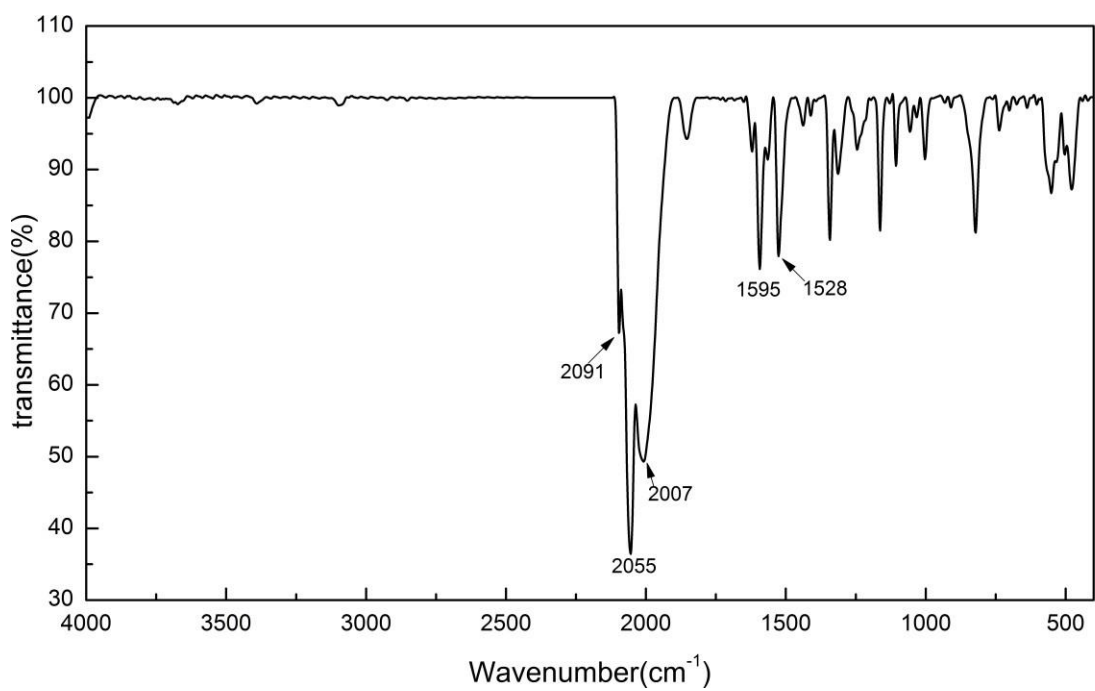

IR spectrum of compound **5c**.

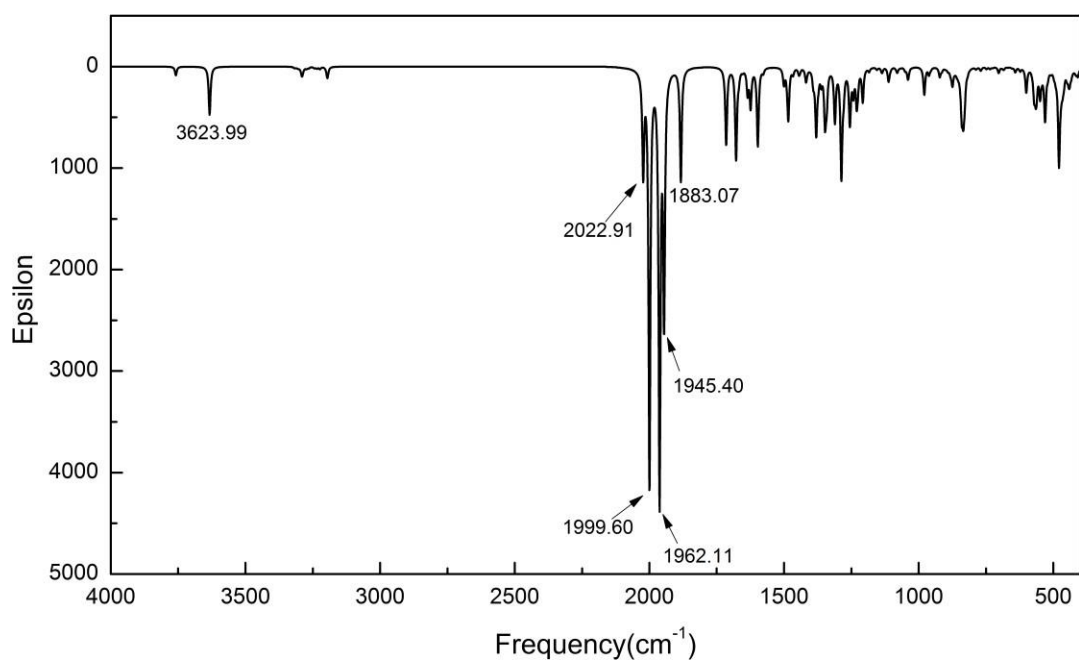

Calculated IR spectrum of compound **5c**.

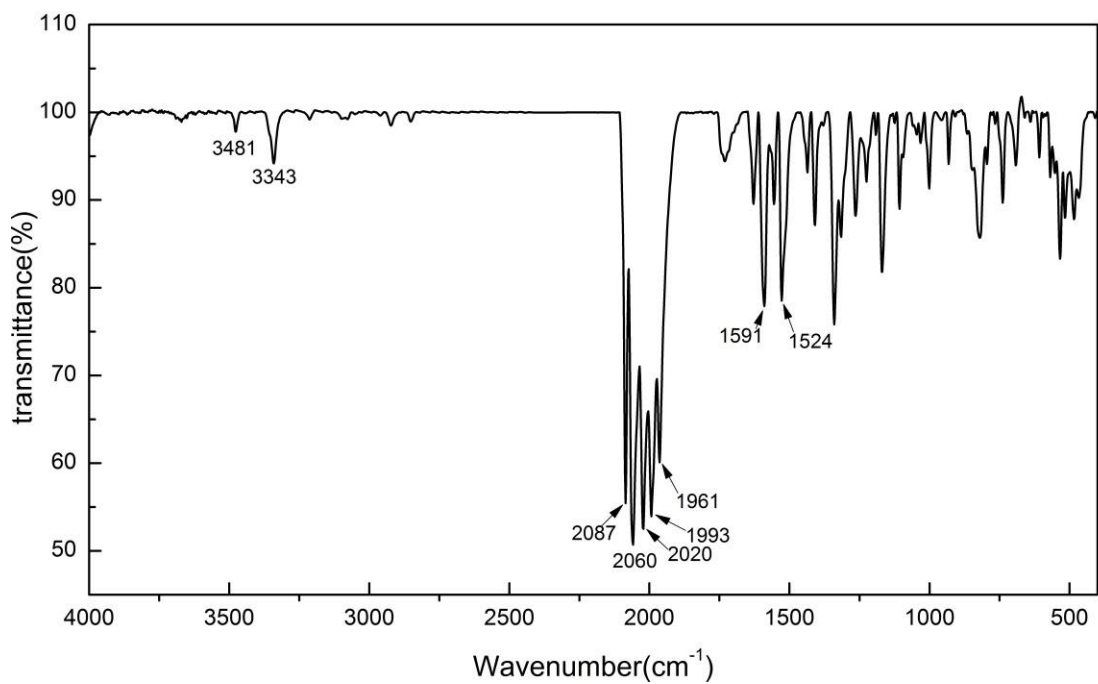

IR spectrum of compound **5d**.

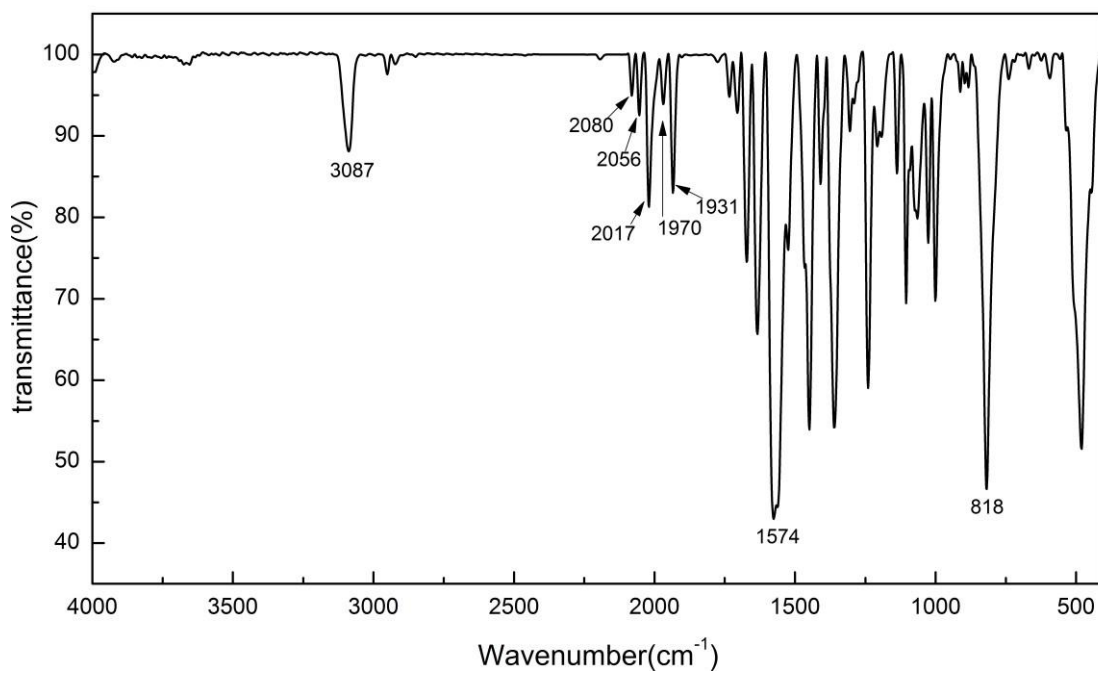

IR spectrum of compound **6a**.
